# Supplementary material for: N,N′-Dioxide/nickel(ii)-catalyzed asymmetric Diels–Alder reaction of cyclopentadiene with 2,3-dioxopyrrolidines and 2-alkenoyl pyridines
Source: Royal Society of Chemistry journal article supplement (doi:10.1039/c6cc03346f), 2016-01-01
Supplement: c6cc03346f1.pdf [file c6cc03346f1.pdf]

# Electronic Supplementary Information (ESI)

## ***N,N'*-Dioxide/ nickel(II)-catalyzed asymmetric Diels–Alder reaction of cyclopentadiene with 2,3-dioxopyrrolidines and 2-alkenoyl pyridines**

Yan Lu, Yuhang Zhou, Lili Lin,\* Haifeng Zheng, Kai Fu, Xiaohua Liu, and Xiaoming Feng\*

Key Laboratory of Green Chemistry & Technology, Ministry of Education, College of Chemistry, Sichuan University, Chengdu 610064, People's Republic of China

Fax: (+86)28-85418249

E-mail: [lililin@scu.edu.cn](mailto:lililin@scu.edu.cn); [xmfeng@scu.edu.cn](mailto:xmfeng@scu.edu.cn)

### Contents

|                                                                                       |           |
|---------------------------------------------------------------------------------------|-----------|
| <b>1. General method</b>                                                              | <b>2</b>  |
| <b>2. General procedure of the catalytic reactions</b>                                | <b>2</b>  |
| <b>3. Product characterization data</b>                                               | <b>3</b>  |
| <b>4. Determination methods of relative and absolute configurations of products 5</b> | <b>31</b> |
| <b>5. Experimental procedure for the reduction of 3d</b>                              | <b>32</b> |
| <b>6. Gram scale experiment</b>                                                       | <b>33</b> |
| <b>7. Operando IR experiments</b>                                                     | <b>33</b> |
| <b>8. ESI-MS analysis of the solution of catalyst/substrate</b>                       | <b>34</b> |
| <b>9. Copies of CD Spectra and their Absolute Configurations</b>                      | <b>35</b> |
| <b>10. Copies of <sup>1</sup>H NMR and <sup>13</sup>C NMR Spectra for Products</b>    | <b>39</b> |
| <b>11. References</b>                                                                 | <b>69</b> |

## 1. General method

$^1\text{H}$  NMR spectra were recorded on commercial instruments (400 MHz). Chemical shifts were reported in ppm from tetramethylsilane with the solvent resonance as the internal standard ( $\text{CDCl}_3$ ,  $\delta = 7.26$ ). Spectra were reported as follows: chemical shift ( $\delta$  ppm), multiplicity (s = singlet, d = doublet, t = triplet, q = quartet, m = multiplet), coupling constants (Hz), integration and assignment.  $^{13}\text{C}$  NMR spectra were collected on commercial instruments (100 MHz) with complete proton decoupling. Chemical shifts are reported in ppm from the tetramethylsilane with the solvent resonance as internal standard ( $\text{CDCl}_3$ ,  $\delta = 77.0$ ). HRMS was recorded on a commercial apparatus (ESI Source). Enantiomeric excesses (ee) were determined by HPLC analysis using the corresponding commercial chiralpak column as stated in the experimental procedures at 25 °C. Optical rotations were reported as follows:  $[\alpha]_{\text{D}}^{\text{T}}$  (c g/100 mL, in solvent). Reactions were carried out with commercial available reagent in over dried apparatus. All the solvents were purified by usual methods before use. Chiral *N,N'*-dioxide ligands<sup>1</sup>, 2,3-dioxopyrrolidines<sup>2</sup> and 2-alkenoyl pyridines<sup>3</sup> were prepared using literature method.

## 2. General procedure of the catalytic reactions

**L-RaPr**<sub>2</sub> (7.0 mg, 0.01 mmol), **1** or **4** (0.10 mmol) and  $\text{Ni}(\text{OTf})_2$  (3.6 mg, 0.01 mmol) were added to an over-dried reaction tube under nitrogen atmosphere. Then 1.0 mL anhydrous  $\text{Cl}_2\text{CHCH}_2\text{Cl}$  was added and the solution was stirred at 30 °C for 40 min. Subsequently, cyclopentadiene **2** (100 $\mu\text{L}$ ) was added under 30 °C, and the reaction mixture continued stirring for 0.5-24 h. Need to be clearly explained, the diastereomer of the product was same point on TLC plate, but suffer somewhat separation after the chromatography on silica gel. For example, the dr value of **3a** varied from 93:7 to 97:3. To avoid the variation, all dr values were determined using the flash filtration as the isolated procedure. To get the exact yield, the product was further purified by a flash chromatography on silica gel (petroleum ether/ethyl acetate = 3:1-10:1). The enantiomeric excesses (ee) was determined by high-performance liquid chromatography (HPLC). Optical rotations, copies of CD spectra and copies of  $^1\text{H}$  NMR and  $^{13}\text{C}$  NMR spectra of products were determined using the flash chromatography on silica gel as the isolated procedure.

### 3. Product characterization data

(1R,2R,3S,4S)-1'-benzyl-3-phenylspiro[bicyclo[2.2.1]heptane-2,3'-pyrrolidin]-5-ene-4',5'-dione **3a**

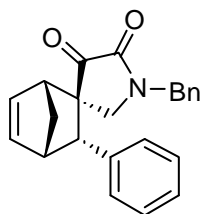

Yield: 30.8 mg (90%), white amorphous solid, 93:7 dr, 97% ee;  $[\alpha]_{D}^{17.3} = -84.8$  ( $c = 0.59$ ,  $\text{CH}_2\text{Cl}_2$ ); HPLC (Daicel chiralcel ID, *n*-hexane/*i*-PrOH 80/20, 1.0 mL/min, 254 nm)  $t_{R(\text{major})} = 26.62$  min,  $t_{R(\text{minor})} = 23.08$  min;  $^1\text{H}$  NMR (400 MHz,  $\text{CDCl}_3$ )  $\delta$  7.28 – 7.25 (m, 3H), 7.21 – 7.12 (m, 3H), 7.07 (dd,  $J = 6.0$ , 2.4 Hz, 1H), 6.89 (dd,  $J = 6.0$ , 2.4 Hz, 1H), 6.70 (dd,  $J = 5.6$ , 3.2 Hz, 1H), 6.17 (dd,  $J = 5.6$ , 3.2 Hz, 1H), 4.70 (d,  $J = 14.4$  Hz, 1H), 4.15 (d,  $J = 14.4$  Hz, 1H), 3.90 (d,  $J = 2.8$  Hz, 1H), 3.27 (s, 1H), 3.01 (s, 1H), 2.97 (d,  $J = 11.2$  Hz, 1H), 2.79 (d,  $J = 11.2$  Hz, 1H), 2.31 (d,  $J = 9.2$  Hz, 1H), 1.57 (d,  $J = 9.2$  Hz, 1H).  $^{13}\text{C}$  NMR (100 MHz,  $\text{CDCl}_3$ )  $\delta = 203.5$ , 159.8, 140.7, 138.8, 135.7, 134.4, 128.9, 128.5, 128.3, 128.1, 127.2, 58.8, 55.7, 51.9, 48.9, 48.4, 48.3, 47.8. ESI-HRMS calcd for  $[\text{C}_{23}\text{H}_{21}\text{NO}_2 + \text{Na}^+]$ : 366.1470, found 366.1470.

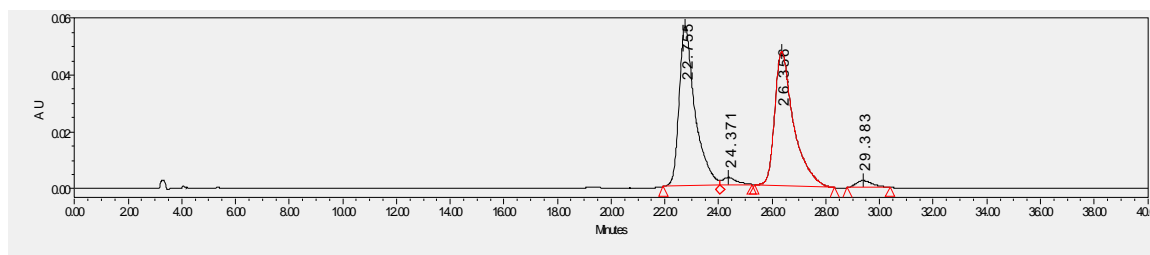

|   | Retention Time | Area    | % Area |
|---|----------------|---------|--------|
| 1 | 22.755         | 2305347 | 47.85  |
| 2 | 24.371         | 96367   | 2.00   |
| 3 | 26.356         | 2311304 | 47.98  |
| 4 | 29.383         | 104562  | 2.17   |

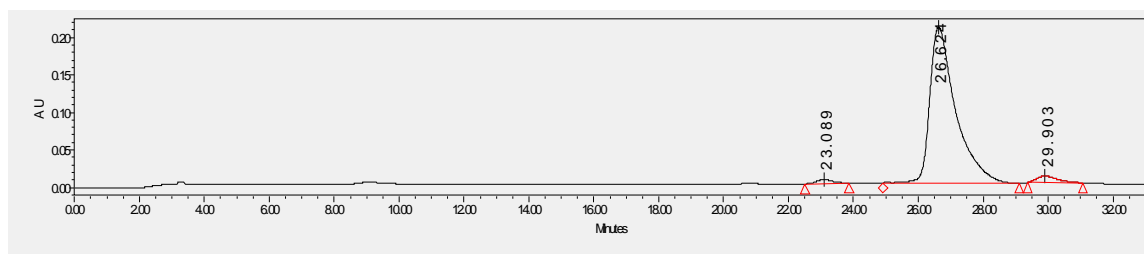

|   | Retention Time | Area     | % Area |
|---|----------------|----------|--------|
| 1 | 23.089         | 182165   | 1.49   |
| 2 | 26.624         | 11616673 | 95.30  |
| 3 | 29.903         | 391080   | 3.21   |

(1R,2R,3S,4S)-1'-benzyl-3-(3-fluorophenyl)spiro[bicyclo[2.2.1]heptane-2,3'-pyrrolidin]-5-ene-4',5'-dione **3b**

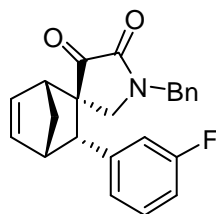

Yield: 32.9 mg (91%), white powder, 93:7 dr, 96% ee;  $[\alpha]_{D}^{20.6} = -68.1$  (c = 0.66, CH<sub>2</sub>Cl<sub>2</sub>); HPLC (Daicel chiralcel IC, *n*-hexane/*i*-PrOH 70/30, 1.0 mL/min, 254 nm)  $t_{R(\text{major})} = 54.68$  min,  $t_{R(\text{minor})} = 27.48$  min; <sup>1</sup>H NMR (400 MHz, CDCl<sub>3</sub>) δ 7.30 – 7.27 (m, 3H), 7.15 – 7.06 (m, 3H), 6.88 – 6.81 (m, 1H), 6.67 (dd, *J* = 5.6, 3.2 Hz, 1H), 6.63 (d, *J* = 8.0 Hz, 2H), 6.21 (dd, *J* = 5.6, 3.2 Hz, 1H), 4.64 (d, *J* = 14.4 Hz, 1H), 4.30 (d, *J* = 14.4 Hz, 1H), 3.89 (d, *J* = 2.8 Hz, 1H), 3.25 (s, 1H), 3.08 – 2.94 (m, 2H), 2.78 (d, *J* = 11.6 Hz, 1H), 2.28 (d, *J* = 9.2 Hz, 1H), 1.57 (d, *J* = 8.8 Hz, 1H). <sup>13</sup>C NMR (100 MHz, CDCl<sub>3</sub>) δ = 203.0, 162.6 (d, *J* = 245 Hz), 159.5, 141.5 (d, *J* = 6.9 Hz), 140.5, 136.1, 134.3, 130.0 (d, *J* = 8.4 Hz), 128.9, 128.3, 128.2, 124.6 (d, *J* = 2.8 Hz), 115.1 (d, *J* = 21.6 Hz), 114.1 (d, *J* = 20.8 Hz), 58.1, 55.6, 52.1, 48.8, 48.4, 48.3, 47.8. ESI-HRMS calcd for [C<sub>23</sub>H<sub>20</sub>FNO<sub>2</sub>+Na<sup>+</sup>]: 384.1376, found 384.1371.

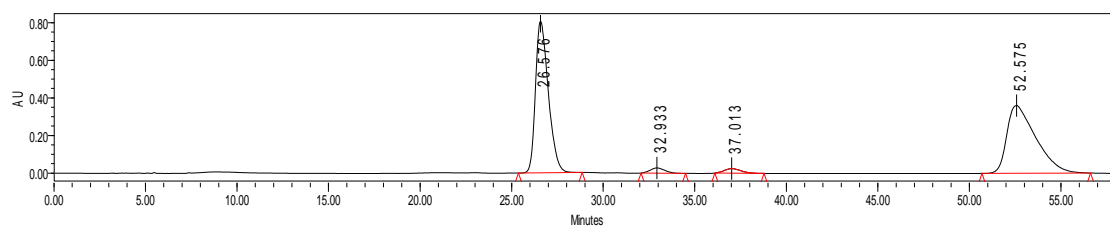

|   | Retention Time | Area     | % Area |
|---|----------------|----------|--------|
| 1 | 26.576         | 39307903 | 48.07  |
| 2 | 32.933         | 1528148  | 1.87   |
| 3 | 37.013         | 1512775  | 1.85   |
| 4 | 52.575         | 39419918 | 48.21  |

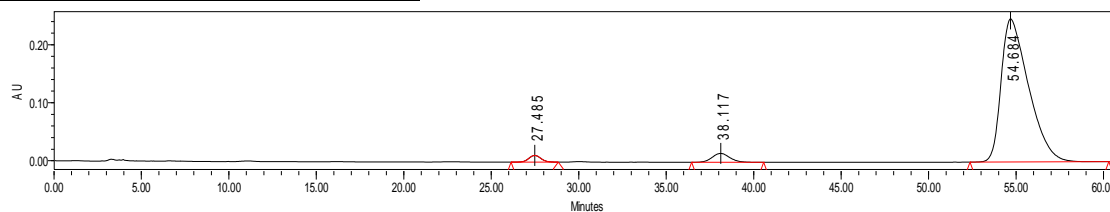

|   | Retention Time | Area     | % Area |
|---|----------------|----------|--------|
| 1 | 27.485         | 567283   | 1.99   |
| 2 | 38.117         | 1071392  | 3.76   |
| 3 | 54.684         | 26887686 | 94.26  |



(1R,2R,3S,4S)-1'-benzyl-3-(4-fluorophenyl)spiro[bicyclo[2.2.1]heptane-2,3'-pyrrolidin]-5-ene-4',5'-dione **3c**

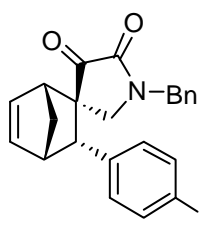

Yield: 31.3 mg (87%), white powder, 92:8 dr, 95% ee;  $[\alpha]^{25.0}_D = -67.6$  ( $c = 0.63$ ,  $\text{CH}_2\text{Cl}_2$ ); HPLC (Daicel chiralcel IC, *n*-hexane/*i*-PrOH 70/30, 1.0 mL/min, 254 nm)  $t_{R(\text{major})} = 41.47$  min,  $t_{R(\text{minor})} = 29.61$  min;  $^1\text{H}$  NMR (400 MHz,  $\text{CDCl}_3$ )  $\delta$  7.32 – 7.27 (m, 3H), 7.10 – 7.01 (m, 2H), 6.90 – 6.76 (m, 4H), 6.67 (dd,  $J = 5.6, 2.8$  Hz, 1H), 6.22 (dd,  $J = 5.6, 3.2$  Hz, 1H), 4.54 (d,  $J = 14.4$  Hz, 1H), 4.35 (d,  $J = 14.4$  Hz, 1H), 3.85 (d,  $J = 2.7$  Hz, 1H), 3.23 (s, 1H), 3.08 – 2.94 (m, 2H), 2.76 (d,  $J = 11.6$  Hz, 1H), 2.31 (d,  $J = 9.2$  Hz, 1H), 1.57 (d,  $J = 9.2$  Hz, 1H).  $^{13}\text{C}$  NMR (100 MHz,  $\text{CDCl}_3$ )  $\delta = 203.5, 161.7$  (d,  $J = 245$  Hz), 159.6, 140.4, 136.1, 134.4 (d,  $J = 3.3$  Hz), 134.3, 130.0 (d,  $J = 7.8$  Hz), 128.9, 128.4, 128.2, 115.3 (d,  $J = 21.1$  Hz), 58.2, 55.4, 52.0, 48.7, 48.5, 48.3, 47.9. ESI-HRMS calcd for  $[\text{C}_{23}\text{H}_{20}\text{FNO}_2 + \text{Na}^+]$ : 384.1376, found 384.1375.

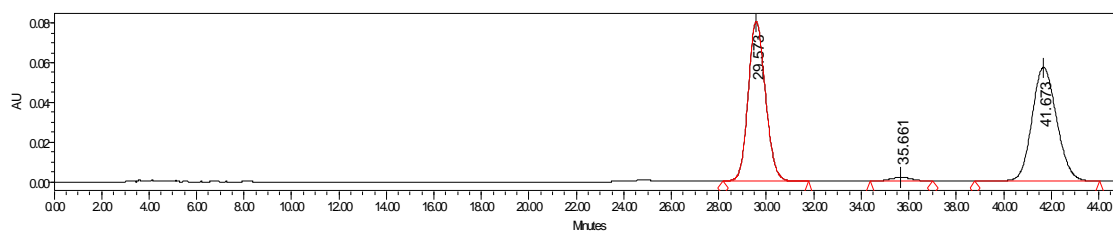

|   | Retention Time | Area    | % Area |
|---|----------------|---------|--------|
| 1 | 29.573         | 4115925 | 49.12  |
| 2 | 35.661         | 125669  | 1.50   |
| 3 | 41.673         | 4137112 | 49.38  |

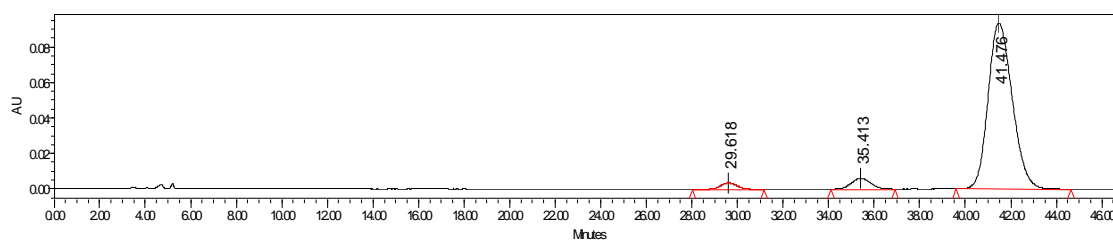

|   | Retention Time | Area    | % Area |
|---|----------------|---------|--------|
| 1 | 29.618         | 184680  | 2.48   |
| 2 | 35.413         | 367201  | 4.93   |
| 3 | 41.476         | 6890907 | 92.59  |

(1R,2R,3S,4S)-1'-benzyl-3-(3-chlorophenyl)spiro[bicyclo[2.2.1]heptane-2,3'-pyrrolidin]-5-ene-4',  
5'-dione **3d**

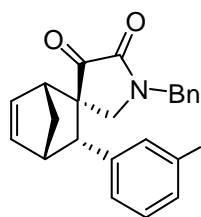

Yield: 34.3 mg (91%), white solid, 93:7 dr, 97% ee;  $[\alpha]_D^{19.0} = -80.6$  (c = 0.75, CH<sub>2</sub>Cl<sub>2</sub>); HPLC (Daicel chiralcel IC, *n*-hexane/*i*-PrOH 70/30, 1.0 mL/min, 254 nm)  $t_{R(\text{major})} = 40.37$  min,  $t_{R(\text{minor})} = 25.67$  min; <sup>1</sup>H NMR (400 MHz, CDCl<sub>3</sub>) δ 7.30 – 7.27 (m, 3H), 7.14 – 7.02 (m, 4H), 6.91 (t, *J* = 1.6 Hz, 1H), 6.72 (d, *J* = 7.6 Hz, 1H), 6.68 (dd, *J* = 6.0, 3.2 Hz, 1H), 6.21 (dd, *J* = 6.0, 3.2 Hz, 1H), 4.63 (d, *J* = 14.4 Hz, 1H), 4.32 (d, *J* = 14.4 Hz, 1H), 3.86 (d, *J* = 2.8 Hz, 1H), 3.25 (s, 1H), 3.02 – 2.98 (m, 2H), 2.78 (d, *J* = 11.6 Hz, 1H), 2.28 (d, *J* = 8.8 Hz, 1H), 1.57 (d, *J* = 9.2 Hz, 1H). <sup>13</sup>C NMR (100 MHz, CDCl<sub>3</sub>) δ = 203.0, 159.5, 141.0, 140.4, 136.2, 134.4, 134.3, 129.8, 128.9, 128.4, 128.3, 128.2, 127.4, 126.9, 58.1, 55.6, 52.1, 48.8, 48.4, 48.3, 47.8. ESI-HRMS: calcd for [C<sub>23</sub>H<sub>20</sub><sup>34.9689</sup>CINO<sub>2</sub>+Na<sup>+</sup>] 400.1080, found 400.1079; ESI-HRMS: calcd for [C<sub>23</sub>H<sub>20</sub><sup>36.9659</sup>CINO<sub>2</sub>+Na<sup>+</sup>] 402.1051, found 402.1069.

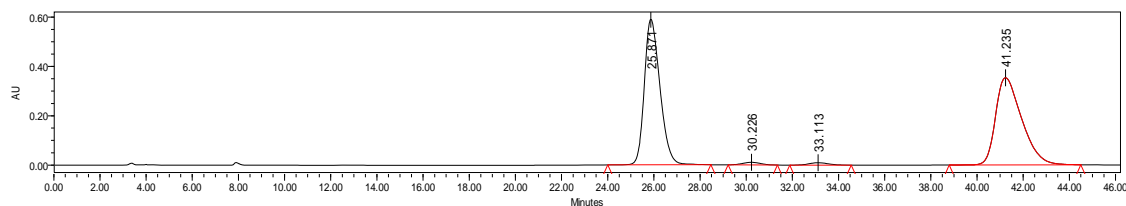

|   | Retention Time | Area     | % Area |
|---|----------------|----------|--------|
| 1 | 25.871         | 27774686 | 49.06  |
| 2 | 30.226         | 562901   | 0.99   |
| 3 | 33.113         | 555649   | 0.98   |
| 4 | 41.235         | 27720996 | 48.96  |

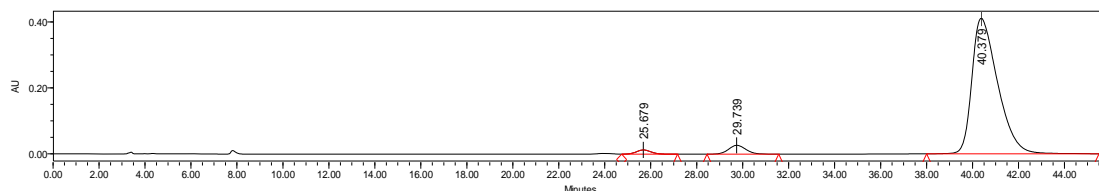

|   | Retention Time | Area     | % Area |
|---|----------------|----------|--------|
| 1 | 25.679         | 569298   | 1.68   |
| 2 | 29.739         | 1398259  | 4.13   |
| 3 | 40.379         | 31918263 | 94.19  |

(1R,2R,3S,4S)-1'-benzyl-3-(4-chlorophenyl)spiro[bicyclo[2.2.1]heptane-2,3'-pyrrolidin]-5-ene-4',  
5'-dione **3e**

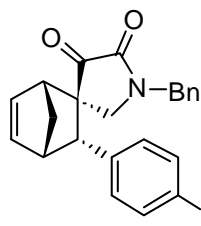

Yield: 32.3 mg (86%), white powder, 93:7 dr, 95% ee;  $[\alpha]_D^{23.0} = -76.0$  (c = 0.65, CH<sub>2</sub>Cl<sub>2</sub>); HPLC (Daicel chiralcel IC, *n*-hexane/*i*-PrOH 70/30, 1.0 mL/min, 254 nm)  $t_{R(\text{major})} = 41.95$  min,  $t_{R(\text{minor})} = 29.89$  min; <sup>1</sup>H NMR (400 MHz, CDCl<sub>3</sub>) δ 7.31 – 7.27 (m, 3H), 7.18 – 7.01 (m, 2H), 7.00 – 6.72 (m, 4H), 6.67 (dd, *J* = 5.6, 2.8 Hz, 1H), 6.22 (dd, *J* = 5.6, 2.8 Hz, 1H), 4.54 (d, *J* = 14.4 Hz, 1H), 4.35 (d, *J* = 14.4 Hz, 1H), 3.85 (d, *J* = 2.8 Hz, 1H), 3.24 (s, 1H), 3.11 – 2.94 (m, 2H), 2.76 (d, *J* = 11.6 Hz, 1H), 2.31 (d, *J* = 8.8 Hz, 1H), 1.57 (d, *J* = 9.2 Hz, 1H). <sup>13</sup>C NMR (100 MHz, CDCl<sub>3</sub>) δ = 203.5, 162.9, 160.5, 159.6, 140.4, 136.1, 134.5, 134.4, 134.3, 130.1, 129.9, 128.9, 128.4, 128.2, 115.5, 115.3, 58.2, 55.4, 52.0, 48.7, 48.5, 48.3, 47.9. ESI-HRMS: calcd for [C<sub>23</sub>H<sub>20</sub><sup>34.9689</sup>CINO<sub>2</sub>+Na<sup>+</sup>] 400.1080, found 400.1092; ESI-HRMS: calcd for [C<sub>23</sub>H<sub>20</sub><sup>36.9659</sup>CINO<sub>2</sub>+Na<sup>+</sup>] 402.1051, found 402.1088.

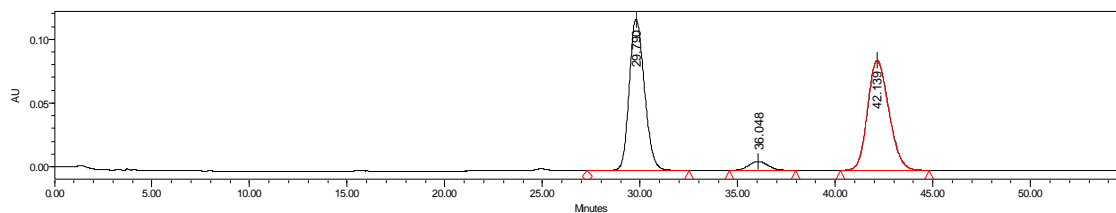

|   | Retention Time | Area    | % Area |
|---|----------------|---------|--------|
| 1 | 29.790         | 6446549 | 48.01  |
| 2 | 36.048         | 476441  | 3.55   |
| 3 | 42.139         | 6504205 | 48.44  |

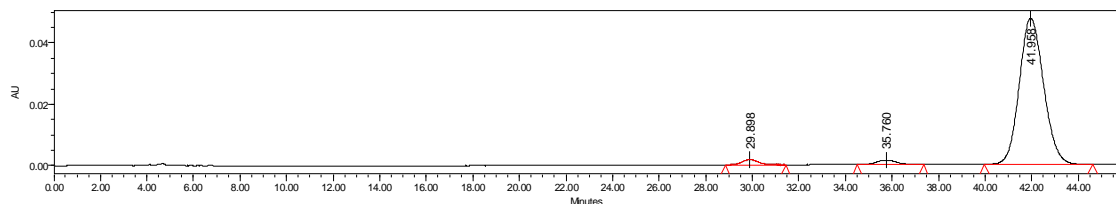

|   | Retention Time | Area    | % Area |
|---|----------------|---------|--------|
| 1 | 29.898         | 87517   | 2.42   |
| 2 | 35.760         | 85684   | 2.37   |
| 3 | 41.958         | 3441784 | 95.21  |

(1R,2R,3S,4S)-1'-benzyl-3-(3-bromophenyl)spiro[bicyclo[2.2.1]heptane-2,3'-pyrrolidin]-5-ene-4',  
5'-dione **3f**

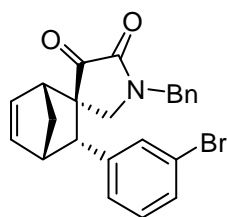

Yield: 38.9 mg (92%), white amorphous solid, 94:6 dr, 97% ee;  $[\alpha]^{18.1}_D = -87.5$  ( $c = 0.81$ ,  $\text{CH}_2\text{Cl}_2$ ); HPLC (Daicel chiralcel IC, *n*-hexane/*i*-PrOH 70/30, 1.0 mL/min, 254 nm)  $t_{R(\text{major})} = 39.06$  min,  $t_{R(\text{minor})} = 26.66$  min;  $^1\text{H}$  NMR (400 MHz,  $\text{CDCl}_3$ )  $\delta$  7.31 – 7.27 (m, 3H), 7.10 – 7.08 (m, 3H), 6.98 (t,  $J = 8.0$  Hz, 1H), 6.76 (d,  $J = 7.6$  Hz, 1H), 6.67 (dd,  $J = 5.6, 2.8$  Hz, 1H), 6.22 (dd,  $J = 5.6, 2.8$  Hz, 1H), 4.64 (d,  $J = 14.4$  Hz, 1H), 4.32 (d,  $J = 14.4$  Hz, 1H), 3.85 (d,  $J = 2.8$  Hz, 1H), 3.25 (s, 1H), 3.02 – 2.98 (m, 2H), 2.78 (d,  $J = 11.2$  Hz, 1H), 2.28 (d,  $J = 8.8$  Hz, 1H), 1.57 (d,  $J = 9.2$  Hz, 1H).  $^{13}\text{C}$  NMR (100 MHz,  $\text{CDCl}_3$ )  $\delta = 203.0, 159.5, 141.3, 140.3, 136.2, 134.3, 131.3, 130.3, 130.0, 128.9, 128.3, 128.2, 127.4, 122.7, 58.1, 55.6, 52.1, 48.8, 48.4, 48.3, 47.8$ . ESI-HRMS: calcd for  $[\text{C}_{23}\text{H}_{20}^{78.9183}\text{BrNO}_2 + \text{Na}^+]$  444.0575, found 444.0573; ESI-HRMS: calcd for  $[\text{C}_{23}\text{H}_{20}^{80.9163}\text{BrNO}_2 + \text{Na}^+]$  446.0555, found 446.0546.

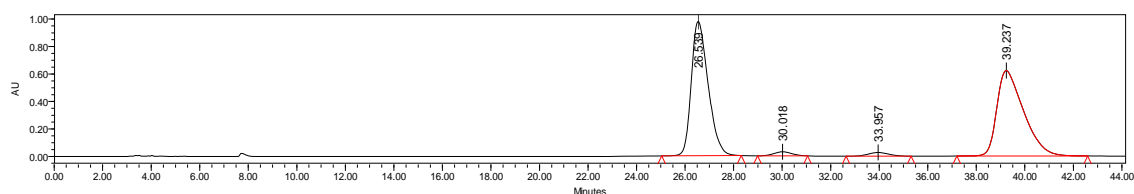

|   | Retention Time | Area     | % Area |
|---|----------------|----------|--------|
| 1 | 26.539         | 47122219 | 48.25  |
| 2 | 30.018         | 1521675  | 1.56   |
| 3 | 33.957         | 1585574  | 1.62   |
| 4 | 39.237         | 47436026 | 48.57  |

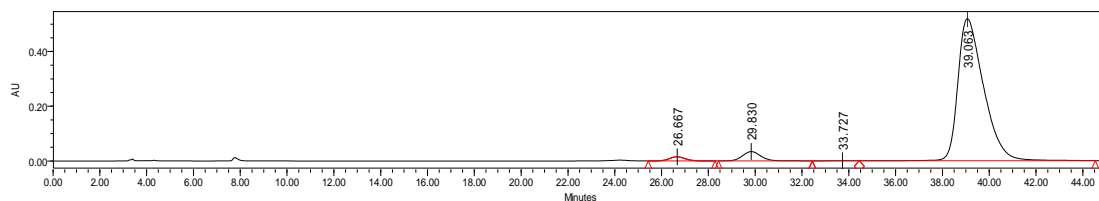

|   | Retention Time | Area     | % Area |
|---|----------------|----------|--------|
| 1 | 26.667         | 701020   | 1.66   |
| 2 | 29.830         | 1835033  | 4.36   |
| 3 | 33.727         | 19663    | 0.05   |
| 4 | 39.063         | 39548753 | 93.93  |

(1R,2R,3S,4S)-1'-benzyl-3-(4-bromophenyl)spiro[bicyclo[2.2.1]heptane-2,3'-pyrrolidin]-5-ene-4',  
5'-dione **3g**

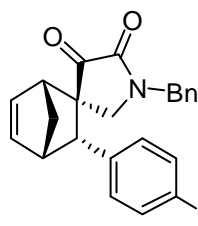

Yield: 40.8 mg (97%), white amorphous solid, 93:7 dr, 96% ee;  $[\alpha]_D^{22.8} = -80.5$  ( $c = 0.82$ ,  $\text{CH}_2\text{Cl}_2$ ); HPLC (Daicel chiralcel IC, *n*-hexane/*i*-PrOH 70/30, 1.0 mL/min, 254 nm)  $t_{R(\text{major})} = 43.11$  min,  $t_{R(\text{minor})} = 30.08$  min;  $^1\text{H}$  NMR (400 MHz,  $\text{CDCl}_3$ )  $\delta$  7.33 – 7.27 (m, 3H), 7.23 – 7.20 (m, 2H), 7.12 – 7.04 (m, 2H), 6.72 (d,  $J = 8.4$  Hz, 2H), 6.65 (dd,  $J = 5.6, 2.8$  Hz, 1H), 6.22 (dd,  $J = 5.6, 3.2$  Hz, 1H), 4.46 (q,  $J = 14.4$  Hz, 2H), 3.81 (d,  $J = 2.8$  Hz, 1H), 3.23 (s, 1H), 3.06 – 2.95 (m, 2H), 2.76 (d,  $J = 11.2$  Hz, 1H), 2.31 (d,  $J = 9.2$  Hz, 1H), 1.57 (d,  $J = 8.8$  Hz, 1H).  $^{13}\text{C}$  NMR (100 MHz,  $\text{CDCl}_3$ )  $\delta = 203.3, 159.5, 140.4, 137.8, 136.2, 134.2, 131.6, 130.1, 128.9, 128.4, 128.3, 121.1, 58.4, 55.3, 52.1, 48.7, 48.3, 47.9$ . ESI-HRMS: calcd for  $[\text{C}_{23}\text{H}_{20}^{78.9183}\text{BrNO}_2 + \text{Na}^+]$  444.0575, found 444.0580; ESI-HRMS: calcd for  $[\text{C}_{23}\text{H}_{20}^{80.9163}\text{BrNO}_2 + \text{Na}^+]$  446.0555, found 446.0543.

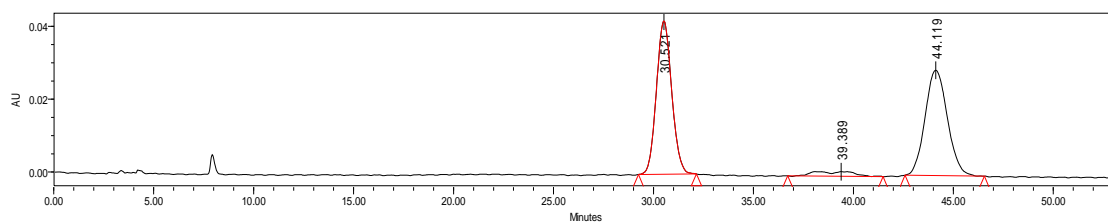

|   | Retention Time | Area    | % Area |
|---|----------------|---------|--------|
| 1 | 30.521         | 2236138 | 48.02  |
| 2 | 39.389         | 179965  | 3.86   |
| 3 | 44.119         | 2240571 | 48.12  |

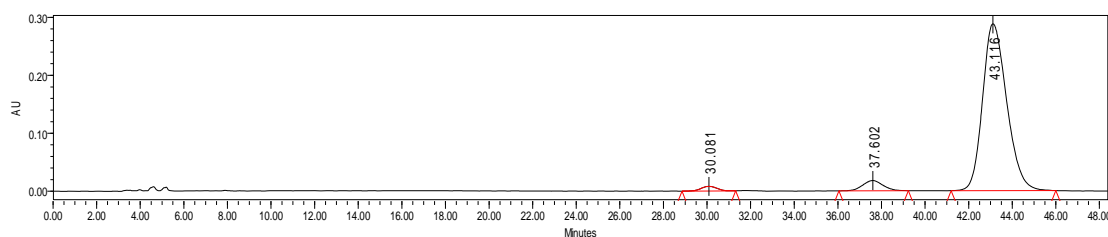

|   | Retention Time | Area     | % Area |
|---|----------------|----------|--------|
| 1 | 30.081         | 405185   | 1.71   |
| 2 | 37.602         | 1153697  | 4.88   |
| 3 | 43.116         | 22102811 | 93.41  |

(1R,2R,3S,4S)-1'-benzyl-3-(4-(trifluoromethyl)phenyl)spiro[bicyclo[2.2.1]heptane-2,3'-pyrrolidin]-5-ene-4',5'-dione **3h**

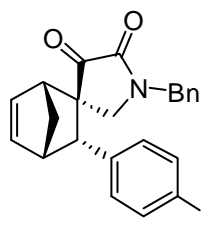

Yield: 36.5 mg (89%), white amorphous solid, 94:6 dr, 96% ee;  $[\alpha]_{D}^{18.6} = -60.8$  ( $c = 0.73$ ,  $\text{CH}_2\text{Cl}_2$ ); HPLC (Daicel chiralcel IC, *n*-hexane/*i*-PrOH 70/30, 1.0 mL/min, 254 nm)  $t_{R(\text{major})} = 27.79$  min,  $t_{R(\text{minor})} = 18.53$  min;  $^1\text{H}$  NMR (400 MHz,  $\text{CDCl}_3$ )  $\delta$  7.34 (d,  $J = 8.2$  Hz, 2H), 7.30 – 7.26 (m, 3H), 7.10 – 7.06 (m, 2H), 6.95 (d,  $J = 8.4$  Hz, 2H), 6.68 (dd,  $J = 5.6, 2.8$  Hz, 1H), 6.24 (dd,  $J = 5.6, 3.2$  Hz, 1H), 4.48 (s, 2H), 3.94 (d,  $J = 2.4$  Hz, 1H), 3.29 (s, 1H), 3.13 – 2.97 (m, 2H), 2.74 (d,  $J = 11.6$  Hz, 1H), 2.33 (d,  $J = 8.8$  Hz, 1H), 1.60 (d,  $J = 9.2$  Hz, 1H).  $^{13}\text{C}$  NMR (100 MHz,  $\text{CDCl}_3$ )  $\delta$  = 202.9, 159.4, 143.0, 140.4, 136.3, 134.3, 128.9, 128.8, 128.4, 128.4, 125.4 (q, 2C), 122.5, 58.3, 55.2, 52.3, 48.7, 48.4, 48.2, 47.7. ESI-HRMS calcd for  $[\text{C}_{24}\text{H}_{20}\text{F}_3\text{NO}_2 + \text{Na}^+]$ : 434.1344, found 434.1343.

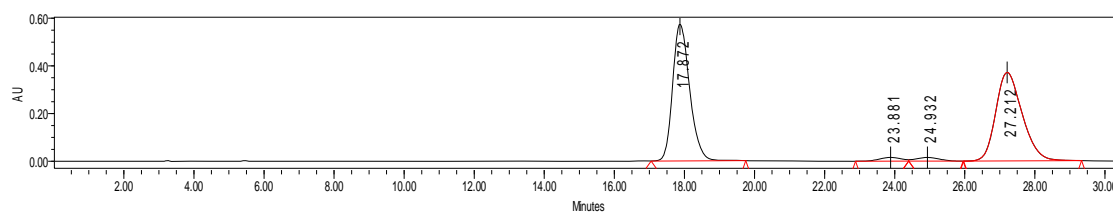

|   | Retention Time | Area     | % Area |
|---|----------------|----------|--------|
| 1 | 17.872         | 19392930 | 48.32  |
| 2 | 23.881         | 672190   | 1.67   |
| 3 | 24.932         | 698281   | 1.74   |
| 4 | 27.212         | 19368200 | 48.26  |

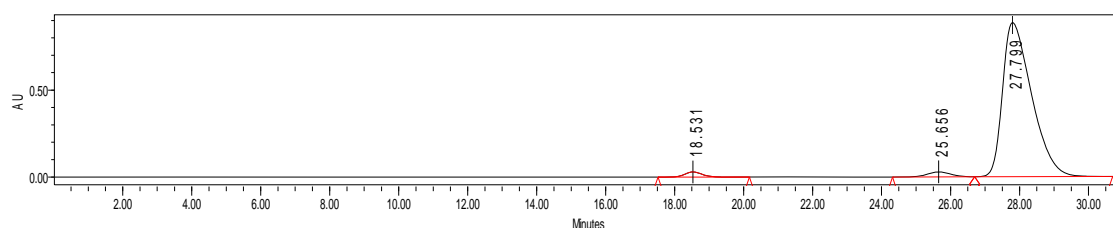

|   | Retention Time | Area     | % Area |
|---|----------------|----------|--------|
| 1 | 18.531         | 1053424  | 1.95   |
| 2 | 25.656         | 1358687  | 2.51   |
| 3 | 27.799         | 51740620 | 95.55  |

(1R,2R,3S,4S)-1'-benzyl-3-(3,4-dichlorophenyl)spiro[bicyclo[2.2.1]heptane-2,3'-pyrrolidin]-5-ene  
-4',5'-dione **3i**

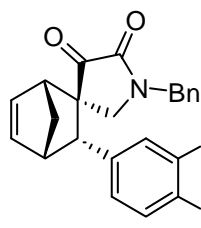

Yield: 36.8 mg (90%), white amorphous solid, 93:7 dr, 97% ee;  $[\alpha]_{\text{D}}^{18.4} = -92.5$  ( $c = 0.74$ ,  $\text{CH}_2\text{Cl}_2$ ); HPLC (Daicel chiralcel IC, *n*-hexane/*i*-PrOH 70/30, 1.0 mL/min, 254 nm)  $t_{\text{R}(\text{major})} = 45.49$  min,  $t_{\text{R}(\text{minor})} = 28.80$  min;  $^1\text{H}$  NMR (400 MHz,  $\text{CDCl}_3$ )  $\delta$  7.38 – 7.26 (m, 3H), 7.16 – 6.95 (m, 4H), 6.67 – 6.61 (m, 2H), 6.26 (dd,  $J = 5.6, 3.2$  Hz, 1H), 4.49 (dd,  $J = 37.2, 14.4$  Hz, 2H), 3.79 (d,  $J = 2.8$  Hz, 1H), 3.22 (s, 1H), 3.11 – 2.98 (m, 2H), 2.76 (d,  $J = 11.6$  Hz, 1H), 2.30 (d,  $J = 9.2$  Hz, 1H), 1.58 (d,  $J = 8.8$  Hz, 1H).  $^{13}\text{C}$  NMR (100 MHz,  $\text{CDCl}_3$ )  $\delta = 202.9, 159.3, 140.1, 139.1, 136.6, 134.1, 132.6, 131.3, 130.4, 130.2, 128.9, 128.4, 128.3, 128.1, 57.8, 55.4, 52.2, 48.6, 48.5, 48.3, 47.9$ . ESI-HRMS: calcd for  $[\text{C}_{23}\text{H}_{19}^{34.9689}\text{Cl}_2\text{NO}_2 + \text{Na}^+]$  434.0691, found 434.0690; ESI-HRMS: calcd for  $[\text{C}_{23}\text{H}_{19}^{36.9659}\text{Cl}_2\text{NO}_2 + \text{Na}^+]$  436.0661, found 436.0666.

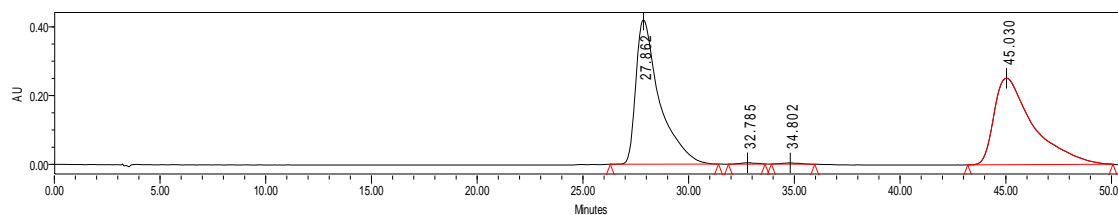

|   | Retention Time | Area     | % Area |
|---|----------------|----------|--------|
| 1 | 27.862         | 32423830 | 49.73  |
| 2 | 32.785         | 197461   | 0.30   |
| 3 | 34.802         | 197304   | 0.30   |
| 4 | 45.030         | 32376270 | 49.66  |

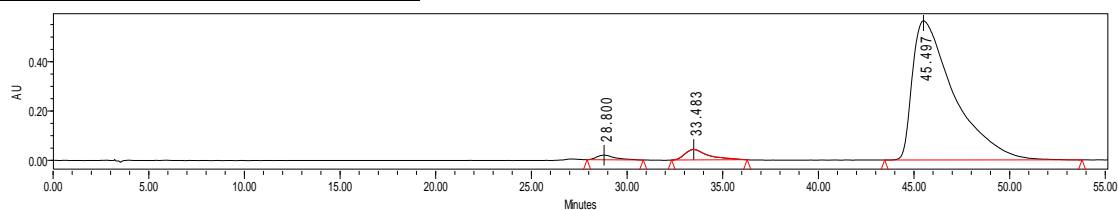

|   | Retention Time | Area     | % Area |
|---|----------------|----------|--------|
| 1 | 28.800         | 1252213  | 1.39   |
| 2 | 33.483         | 3612096  | 4.02   |
| 3 | 45.497         | 84928633 | 94.58  |

(1R,2R,3S,4S)-1'-benzyl-3-(*o*-tolyl)spiro[bicyclo[2.2.1]heptane-2,3'-pyrrolidin]-5-ene-4',5'-dione

3j

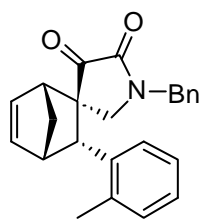

Yield: 28.6 mg (80%), white amorphous solid, 90:10 dr, 75% ee;  $[\alpha]^{20.1}_D = -58.6$  ( $c = 0.57$ ,  $\text{CH}_2\text{Cl}_2$ ); HPLC (Chiralpak Lux 5u Cellulose-2, *n*-hexane/*i*-PrOH 70/30, 1.0 mL/min, 254 nm)  $t_{R(\text{major})} = 28.53$  min,  $t_{R(\text{minor})} = 21.83$  min;  $^1\text{H NMR}$  (400 MHz,  $\text{CDCl}_3$ )  $\delta$  7.20 – 7.18 (m, 3H), 7.05 – 6.88 (m, 6H), 6.73 (dd,  $J = 5.6, 3.2$  Hz, 1H), 6.06 (dd,  $J = 5.6, 3.2$  Hz, 1H), 4.55 (d,  $J = 14.4$  Hz, 1H), 4.27 (d,  $J = 14.4$  Hz, 1H), 3.98 (d,  $J = 2.8$  Hz, 1H), 3.18 (s, 1H), 2.93 (s, 1H), 2.85 (d,  $J = 11.6$  Hz, 1H), 2.63 (d,  $J = 11.6$  Hz, 1H), 2.23 (d,  $J = 9.2$  Hz, 1H), 1.85 (s, 3H), 1.49 (d,  $J = 9.2$  Hz, 1H).  $^{13}\text{C NMR}$  (100 MHz,  $\text{CDCl}_3$ )  $\delta = 202.7, 159.5, 141.6, 137.8, 137.6, 135.2, 134.4, 130.8, 128.9, 128.2, 128.1, 127.4, 127.0, 125.9, 55.4, 53.9, 52.4, 48.7, 48.6, 48.2, 47.9, 21.0$ . ESI-HRMS calcd for  $[\text{C}_{24}\text{H}_{23}\text{NO}_2 + \text{Na}^+]$ : 380.1626, found 380.1623.

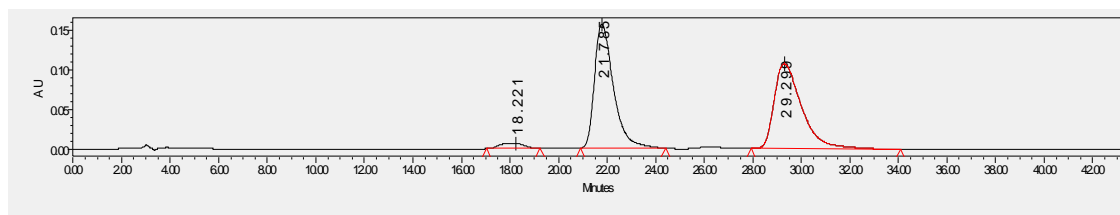

|   | Retention Time | Area    | % Area |
|---|----------------|---------|--------|
| 1 | 18.221         | 451977  | 2.59   |
| 2 | 21.785         | 8542732 | 48.96  |
| 3 | 29.299         | 8452552 | 48.45  |

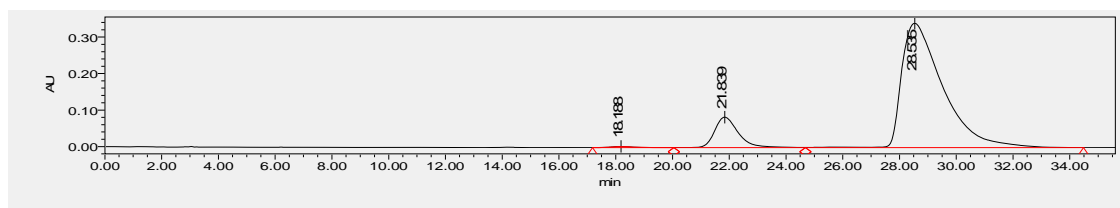

|   | Retention Time | Area     | % Area |
|---|----------------|----------|--------|
| 1 | 18.188         | 153528   | 0.39   |
| 2 | 21.839         | 4811609  | 12.28  |
| 3 | 28.535         | 34212948 | 87.33  |



(1R,2R,3S,4S)-1'-benzyl-3-(p-tolyl)spiro[bicyclo[2.2.1]heptane-2,3'-pyrrolidin]-5-ene-4',5'-dione

**3k**

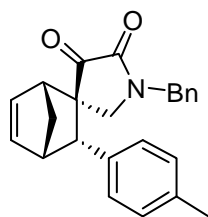

Yield: 29.7 mg (83%), white amorphous solid, 92:8 dr, 93% ee;  $[\alpha]_{D}^{18.8} = -101.7$  ( $c = 0.59$ ,  $\text{CH}_2\text{Cl}_2$ ); HPLC (Daicel chiralcel IC, *n*-hexane/*i*-PrOH 70/30, 1.0 mL/min, 254 nm)  $t_{R(\text{major})} = 38.38$  min,  $t_{R(\text{minor})} = 29.05$  min;  $^1\text{H}$  NMR (400 MHz,  $\text{CDCl}_3$ )  $\delta$  7.23 – 7.18 (m, 3H), 7.05 – 6.97 (m, 2H), 6.87 (d,  $J = 8.0$  Hz, 2H), 6.69 (d,  $J = 8.0$  Hz, 2H), 6.61 (dd,  $J = 5.6, 2.8$  Hz, 1H), 6.10 (dd,  $J = 5.6, 3.2$  Hz, 1H), 4.57 (d,  $J = 14.8$  Hz, 1H), 4.16 (d,  $J = 14.4$  Hz, 1H), 3.79 (d,  $J = 2.8$  Hz, 1H), 3.17 (s, 1H), 2.98 – 2.86 (m, 2H), 2.73 (d,  $J = 11.6$  Hz, 1H), 2.23 (d,  $J = 8.8$  Hz, 1H), 2.20 (s, 3H), 1.48 (d,  $J = 8.8$  Hz, 1H).  $^{13}\text{C}$  NMR (100 MHz,  $\text{CDCl}_3$ )  $\delta = 203.7, 159.8, 140.8, 136.7, 135.7, 135.6, 134.4, 129.2, 128.8, 128.4, 128.4, 128.0, 58.7, 55.6, 51.9, 48.9, 48.4, 48.3, 47.9, 20.9$ . ESI-HRMS calcd for  $[\text{C}_{24}\text{H}_{23}\text{NO}_2 + \text{Na}^+]$ : 380.1626, found 380.1623.

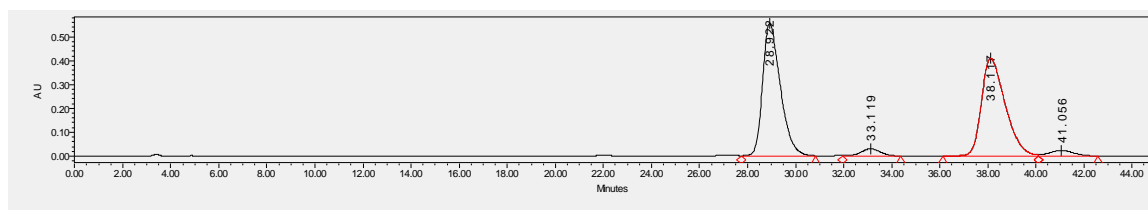

|   | Retention Time | Area     | % Area |
|---|----------------|----------|--------|
| 1 | 28.922         | 28386877 | 47.49  |
| 2 | 33.119         | 1694635  | 2.83   |
| 3 | 38.117         | 28039239 | 46.91  |
| 4 | 41.056         | 1654876  | 2.77   |

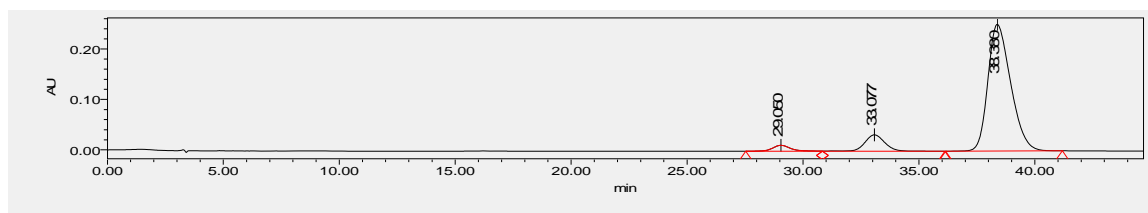

|   | Retention Time | Area     | % Area |
|---|----------------|----------|--------|
| 1 | 29.050         | 608575   | 3.10   |
| 2 | 33.077         | 1908644  | 9.71   |
| 3 | 38.380         | 17132471 | 87.19  |

(1R,2R,3S,4S)-1'-benzyl-3-(4-methoxyphenyl)spiro[bicyclo[2.2.1]heptane-2,3'-pyrrolidin]-5-ene-4',5'-dione **31**

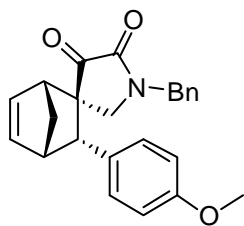

Yield: 31.8 mg (85%), white power, 92:8 dr, 96% ee;  $[\alpha]_{\text{D}}^{18.7} = -113.4$  ( $c = 0.64$ ,  $\text{CH}_2\text{Cl}_2$ ); HPLC (Daicel chiralcel IC,  $n$ -hexane/ $i$ -PrOH 70/30, 1.0 mL/min, 254 nm)  $t_{\text{R}(\text{major})} = 63.74$  min,  $t_{\text{R}(\text{minor})} = 41.23$  min;  $^1\text{H}$  NMR (400 MHz,  $\text{CDCl}_3$ )  $\delta$  7.28 – 7.26 (m, 3H), 7.07 – 7.04 (m, 2H), 6.83 – 6.77 (m, 2H), 6.71 – 6.65 (m, 3H), 6.18 (dd,  $J = 5.6, 2.8$  Hz, 1H), 4.63 (d,  $J = 14.4$  Hz, 1H), 4.23 (d,  $J = 14.4$  Hz, 1H), 3.83 (d,  $J = 2.8$  Hz, 1H), 3.76 (s, 3H), 3.22 (s, 1H), 3.03 – 2.94 (m, 2H), 2.82 (d,  $J = 11.6$  Hz, 1H), 2.31 (d,  $J = 8.8$  Hz, 1H), 1.55 (d,  $J = 8.8$  Hz, 1H).  $^{13}\text{C}$  NMR (100 MHz,  $\text{CDCl}_3$ )  $\delta = 203.8, 159.8, 158.5, 140.7, 135.7, 134.4, 130.7, 129.6, 128.8, 128.3, 128.1, 113.8, 58.4, 55.6, 55.2, 51.9, 48.8, 48.6, 48.3, 47.9$ . ESI-HRMS calcd for  $[\text{C}_{24}\text{H}_{23}\text{NO}_3 + \text{Na}^+]$ : 396.1576, found 396.1572.

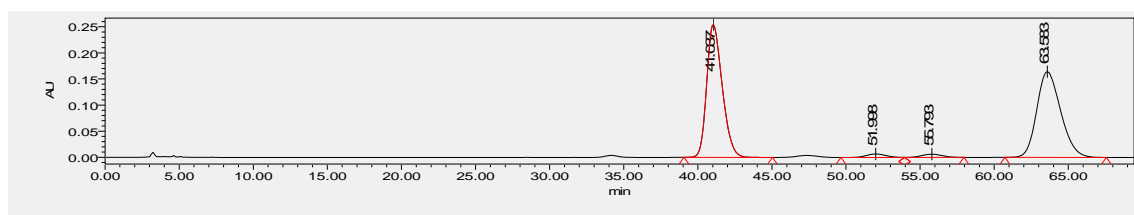

|   | Retention Time | Area     | % Area |
|---|----------------|----------|--------|
| 1 | 41.037         | 18501998 | 48.54  |
| 2 | 51.998         | 602585   | 1.58   |
| 3 | 55.793         | 584442   | 1.53   |
| 4 | 63.583         | 18425569 | 48.34  |

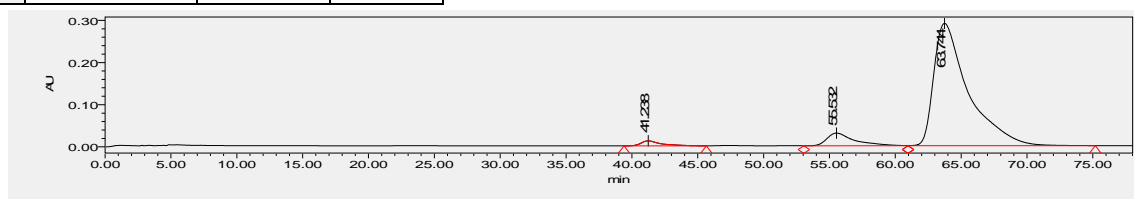

|   | Retention Time | Area     | % Area |
|---|----------------|----------|--------|
| 1 | 41.238         | 1215425  | 2.08   |
| 2 | 55.532         | 4364333  | 7.48   |
| 3 | 63.744         | 52753303 | 90.43  |

(1R,2R,3S,4S)-1'-benzyl-3-(naphthalen-1-yl)spiro[bicyclo[2.2.1]heptane-2,3'-pyrrolidin]-5-ene-4',  
5'-dione **3m**

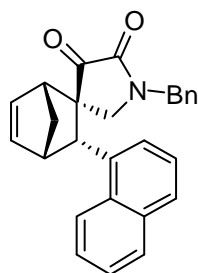

Yield: 36.8 mg (94%), white power, 88:12 dr, 95% ee;  $[\alpha]_{D}^{20.1} = 55.6$  ( $c = 0.74$ ,  $\text{CH}_2\text{Cl}_2$ ); HPLC (Daicel chiralcel IC, *n*-hexane/*i*-PrOH 70/30, 1.0 mL/min, 254 nm)  $t_{R(\text{major})} = 32.68$  min,  $t_{R(\text{minor})} = 28.04$  min;  $^1\text{H NMR}$  (400 MHz,  $\text{CDCl}_3$ )  $\delta$  7.77-7.73(m, 1H), 7.60(d,  $J = 8.0$  Hz, 1H), 7.41-7.37(m, 2H), 7.24-7.14(m, 3H), 7.03(t,  $J = 7.2$  Hz, 1H), 6.94(m, 2H), 6.87(dd,  $J = 5.6, 3.2$  Hz, 1H), 6.49(d,  $J = 7.2$  Hz, 2H), 6.08(dd,  $J = 5.6, 3.2$  Hz, 1H), 4.51(d,  $J = 2.4$ , 1H), 4.14(s, 2H), 3.35(s, 1H), 2.99(s, 1H), 2.67(d,  $J = 12.0$  Hz, 1H), 2.43(d,  $J = 9.2$  Hz, 1H), 2.19(d,  $J = 11.6$  Hz, 1H), 1.61(d,  $J = 9.2$  Hz, 1H).  $^{13}\text{C NMR}$  (100 MHz,  $\text{CDCl}_3$ )  $\delta = 204.3, 159.5, 141.5, 135.5, 135.0, 133.9, 133.6, 132.5, 129.2, 128.6, 128.1, 127.7, 127.6, 126.9, 126.0, 124.9, 124.9, 122.9, 55.0, 54.8, 52.6, 48.5, 48.2, 47.9$ . ESI-HRMS calcd for  $[\text{C}_{27}\text{H}_{23}\text{NO}_2 + \text{Na}^+]$ : 416.1626, found 416.1624.

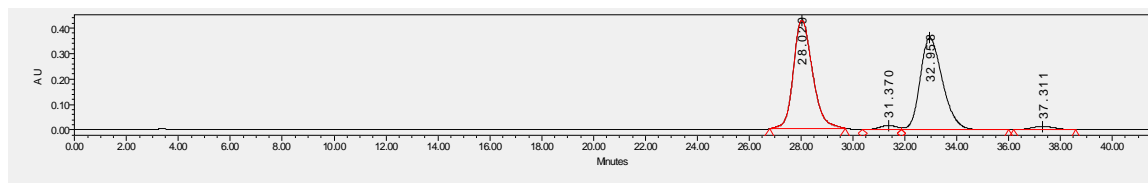

|   | Retention Time | Area     | % Area |
|---|----------------|----------|--------|
| 1 | 28.029         | 21703797 | 48.21  |
| 2 | 31.370         | 838350   | 1.86   |
| 3 | 32.958         | 21639571 | 48.07  |
| 4 | 37.311         | 838830   | 1.86   |

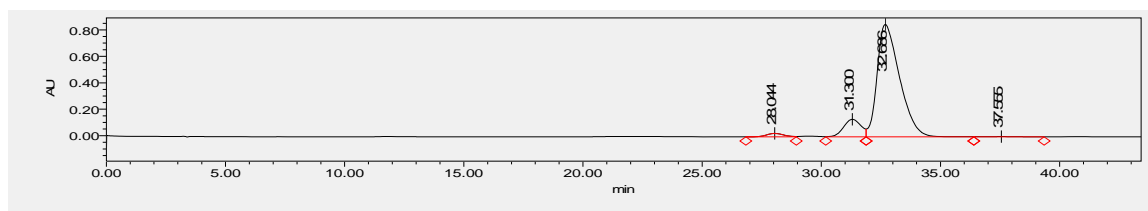

|   | Retention Time | Area     | % Area |
|---|----------------|----------|--------|
| 1 | 28.044         | 1343175  | 2.09   |
| 2 | 31.300         | 6786078  | 10.57  |
| 3 | 32.686         | 55800337 | 86.95  |
| 4 | 37.555         | 244147   | 0.38   |

(1R,2R,3S,4S)-1'-benzyl-3-(naphthalen-2-yl)spiro[bicyclo[2.2.1]heptane-2,3'-pyrrolidin]-5-ene-4',  
5'-dione **3n**

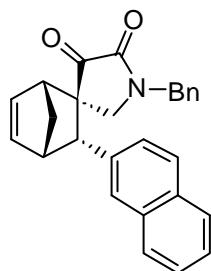

Yield: 33.5 mg (85%), white power, 93:7 dr, 94% ee;  $[\alpha]_{\text{D}}^{18.9} = -131.2$  (c = 0.67, CH<sub>2</sub>Cl<sub>2</sub>); HPLC (Daicel chiralcel ASH, *n*-hexane/*i*-PrOH 70/30, 1.0 mL/min, 254 nm)  $t_{\text{R}(\text{major})} = 58.90$  min,  $t_{\text{R}(\text{minor})} = 33.96$  min; <sup>1</sup>H NMR (400 MHz, CDCl<sub>3</sub>) δ 7.76 – 7.69 (m, 2H), 7.55 (d, *J* = 8.4 Hz, 1H), 7.48 – 7.42 (m, 3H), 7.13 (t, *J* = 7.2 Hz, 1H), 7.04 (t, *J* = 7.2 Hz, 2H), 6.94 – 6.86 (m, 3H), 6.82 (dd, *J* = 5.6, 3.2 Hz, 1H), 6.23 (dd, *J* = 5.6, 3.2 Hz, 1H), 4.57 (d, *J* = 14.4 Hz, 1H), 4.22 (d, *J* = 14.4 Hz, 1H), 4.07 (d, *J* = 2.8 Hz, 1H), 3.35 (s, 1H), 3.05 (s, 1H), 2.99 (d, *J* = 11.6 Hz, 1H), 2.81 (d, *J* = 11.6 Hz, 1H), 2.38 (d, *J* = 9.2 Hz, 1H), 1.62 (d, *J* = 9.2 Hz, 1H). <sup>13</sup>C NMR (100 MHz, CDCl<sub>3</sub>) δ = 203.7, 159.8, 140.8, 136.4, 135.8, 134.2, 133.2, 132.3, 128.7, 128.2, 127.9, 127.8, 127.6, 127.1, 126.6, 126.4, 126.1, 59.4, 55.5, 52.1, 48.9, 48.4, 48.3, 48.1. ESI-HRMS calcd for [C<sub>27</sub>H<sub>23</sub>NO<sub>2</sub>+Na<sup>+</sup>]: 416.1626, found 416.1629.

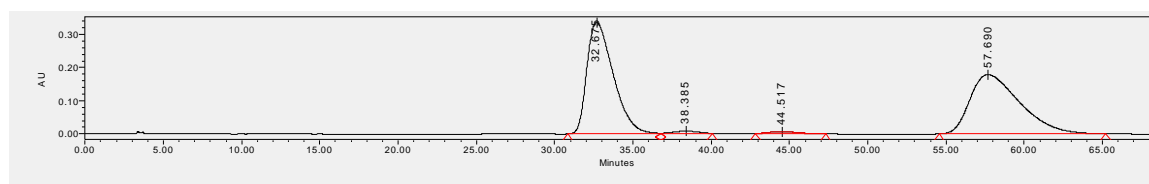

|   | Retention Time | Area     | % Area |
|---|----------------|----------|--------|
| 1 | 32.675         | 39330042 | 49.01  |
| 2 | 38.385         | 772908   | 0.96   |
| 3 | 44.517         | 767227   | 0.96   |
| 4 | 57.690         | 39377979 | 49.07  |

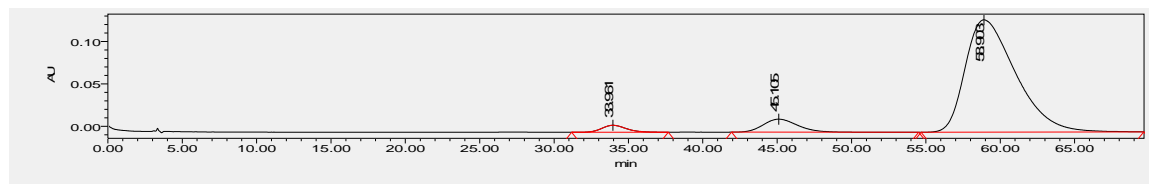

|   | Retention Time | Area     | % Area |
|---|----------------|----------|--------|
| 1 | 33.961         | 934769   | 2.70   |
| 2 | 45.105         | 2484534  | 7.18   |
| 3 | 58.903         | 31194493 | 90.12  |

(1R,2R,3R,4S)-3-(benzo[b]thiophen-3-yl)-1'-benzylspiro[bicyclo[2.2.1]heptane-2,3'-pyrrolidin]-5-ene-4',5'-dione **3o**

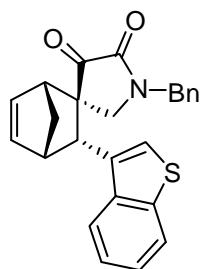

Yield: 31.0 mg (78%), white power, 82:18 dr, 92% ee;  $[\alpha]^{19.0}_D = 6.6$  ( $c = 0.62$ ,  $\text{CH}_2\text{Cl}_2$ ); HPLC (Daicel chiralcel IC, *n*-hexane/*i*-PrOH 70/30, 1.0 mL/min, 254 nm)  $t_{R(\text{major})} = 31.35$  min,  $t_{R(\text{minor})} = 25.68$  min;  $^1\text{H}$  NMR (400 MHz,  $\text{CDCl}_3$ )  $\delta$  7.80 – 7.74 (m, 1H), 7.32 – 7.22 (m, 2H), 7.17 – 7.05 (m, 2H), 7.06 – 6.85 (m, 3H), 6.75 (dd,  $J = 5.7, 2.8$  Hz, 1H), 6.62 (d,  $J = 7.2$  Hz, 1H), 6.13 (dd,  $J = 5.6, 3.2$  Hz, 1H), 4.23 (q,  $J = 14.8$  Hz, 2H), 4.10 (d,  $J = 2.8$  Hz, 1H), 3.32 (s, 1H), 3.01 (s, 1H), 2.78 (d,  $J = 11.6$  Hz, 1H), 2.43 (d,  $J = 11.6$  Hz, 1H), 2.34 (d,  $J = 9.2$  Hz, 1H), 1.57 (d,  $J = 9.2$  Hz, 1H).  $^{13}\text{C}$  NMR (100 MHz,  $\text{CDCl}_3$ )  $\delta = 203.9, 159.5, 140.8, 139.8, 138.9, 135.9, 134.7, 133.8, 128.7, 127.8, 127.8, 127.7, 124.9, 124.8, 122.9, 122.6, 121.3, 54.5, 52.4, 51.6, 48.7, 48.3, 48.1, 47.9$ . ESI-HRMS calcd for  $[\text{C}_{25}\text{H}_{21}\text{NO}_2\text{S} + \text{Na}^+]$ : 422.1191, found 422.1194.

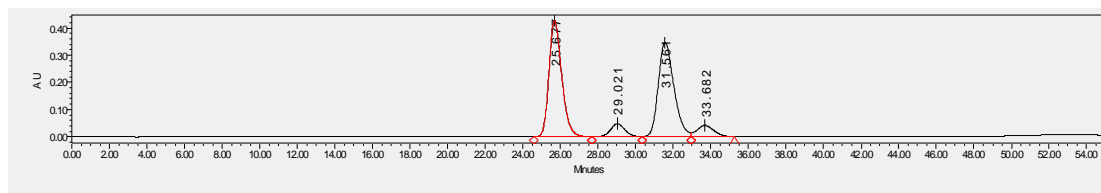

|   | Retention Time | Area     | % Area |
|---|----------------|----------|--------|
| 1 | 25.677         | 20051744 | 44.37  |
| 2 | 29.021         | 2528943  | 5.60   |
| 3 | 31.561         | 20032182 | 44.32  |
| 4 | 33.682         | 2583831  | 5.72   |

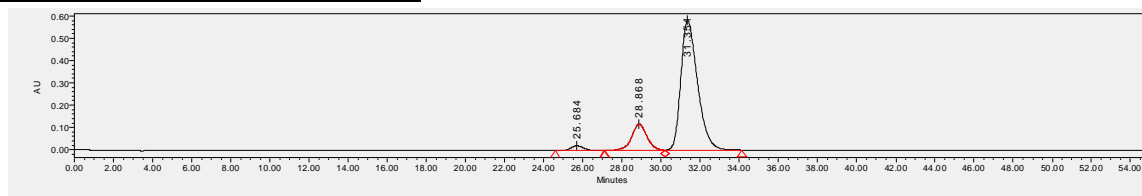

|   | Retention Time | Area     | % Area |
|---|----------------|----------|--------|
| 1 | 25.684         | 1018643  | 2.42   |
| 2 | 28.868         | 6513711  | 15.50  |
| 3 | 31.351         | 34481693 | 82.07  |

(1S,2R,3S,4R)-1'-benzyl-3-(3-chlorophenyl)spiro[bicyclo[2.2.1]heptane-2,3'-pyrrolidine]-4',5'-dione **6**

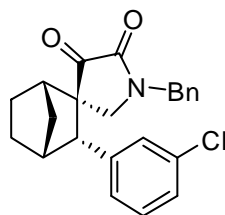

Yield: 25.8 mg (68%), white power, >95:5 dr, 96% ee;  $[\alpha]_{D}^{15.7} = -49.8$  (c = 0.52, CH<sub>2</sub>Cl<sub>2</sub>); HPLC (Daicel chiralcel IC, *n*-hexane/*i*-PrOH 70/30, 1.0 mL/min, 254 nm)  $t_{R(\text{major})} = 44.30$  min,  $t_{R(\text{minor})} = 27.55$  min; <sup>1</sup>H NMR (400 MHz, CDCl<sub>3</sub>) δ 7.37 – 7.29 (m, 3H), 7.24 – 7.18 (m, 2H), 7.17 – 7.13 (m, 1H), 7.03 (t, *J* = 8.0 Hz, 1H), 6.97 (s, 1H), 6.65 (d, *J* = 8.0 Hz, 1H), 4.73 (d, *J* = 14.4 Hz, 1H), 4.45 (d, *J* = 14.4 Hz, 1H), 3.53 (d, *J* = 2.8 Hz, 1H), 3.41 (d, *J* = 11.6 Hz, 1H), 3.18 (d, *J* = 11.6 Hz, 1H), 2.68 (s, 1H), 2.43 (s, 1H), 2.30 (d, *J* = 10.4 Hz, 1H), 1.73 – 1.66 (m, 1H), 1.61 – 1.49 (m, 1H), 1.48 – 1.39 (m, 1H). <sup>13</sup>C NMR (100 MHz, CDCl<sub>3</sub>) δ = 203.3, 159.2, 139.9, 134.4, 134.3, 129.6, 129.0, 128.8, 128.5, 128.3, 127.1, 126.9, 53.3, 51.9, 48.6, 46.9, 46.4, 40.9, 37.1, 25.1, 21.8. ESI-HRMS calcd for [C<sub>23</sub>H<sub>22</sub>ClNO<sub>2</sub>+Na<sup>+</sup>]: 402.1237, found 402.1231.

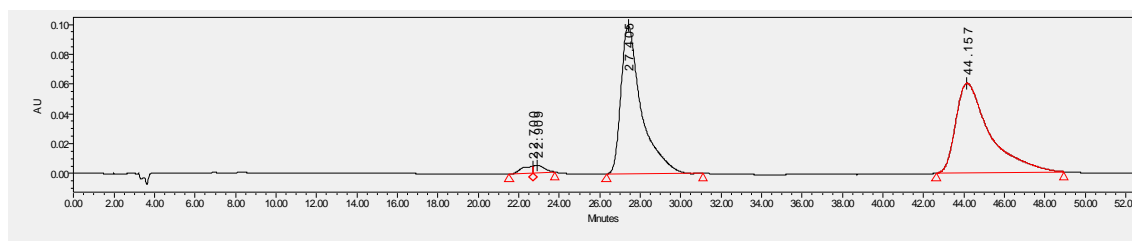

|   | Retention Time | Area    | % Area |
|---|----------------|---------|--------|
| 1 | 22.700         | 185798  | 1.30   |
| 2 | 22.909         | 188638  | 1.32   |
| 3 | 27.405         | 6947122 | 48.46  |
| 4 | 44.157         | 7014929 | 48.93  |

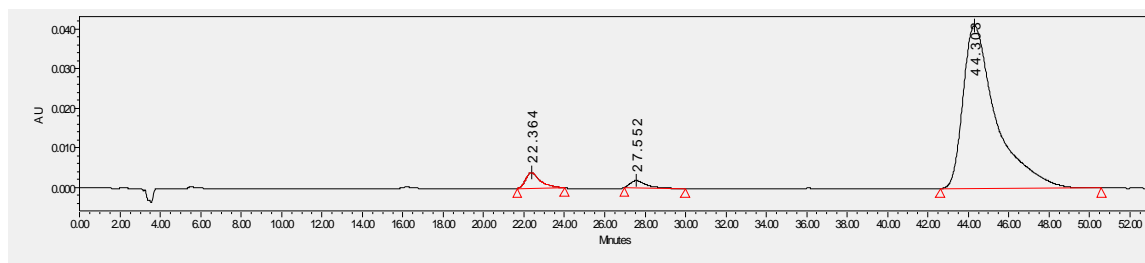

|   | Retention Time | Area    | % Area |
|---|----------------|---------|--------|
| 1 | 22.364         | 204620  | 4.10   |
| 2 | 27.552         | 100412  | 2.01   |
| 3 | 44.303         | 4685041 | 93.89  |

(1S,2R,3R,4R)-3-phenylbicyclo[2.2.1]hept-5-en-2-yl(pyridin-2-yl)methanone **5a**

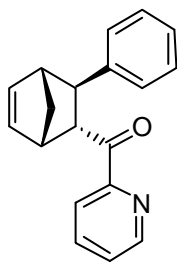

Yield: 24.5 mg (89%), colorless oil, 93:7 dr, 96% ee;  $[\alpha]_{D}^{18.6} = -184.6$  ( $c = 0.51$ ,  $\text{CHCl}_3$ ); HPLC (Daicel chiralcel ODH,  $n$ -hexane/ $i$ -PrOH 98/2, 1.0 mL/min, 254 nm)  $t_{R(\text{major})} = 7.59$  min,  $t_{R(\text{minor})} = 9.83$  min;  $^1\text{H NMR}$  (400 MHz,  $\text{CDCl}_3$ )  $\delta$  8.60 (d,  $J = 4.4$  Hz, 1H), 7.94 (d,  $J = 8.0$  Hz, 1H), 7.74 (td,  $J = 7.6, 1.6$  Hz, 1H), 7.37 (ddd,  $J = 7.6, 4.8, 1.2$  Hz, 1H), 7.27 – 7.16 (m, 4H), 7.11 – 7.06 (m, 1H), 6.42 (dd,  $J = 5.6, 3.2$  Hz, 1H), 5.75 (dd,  $J = 5.6, 2.8$  Hz, 1H), 4.46 (dd,  $J = 5.2, 4.4$  Hz, 1H), 3.47 (s, 1H), 3.38 (d,  $J = 4.4$  Hz, 1H), 3.01 (s, 1H), 2.00 (d,  $J = 8.4$  Hz, 1H), 1.54 (dd,  $J = 8.8, 2.0$  Hz, 1H).  $^{13}\text{C NMR}$  (100 MHz,  $\text{CDCl}_3$ )  $\delta = 201.2, 153.6, 148.9, 144.6, 139.5, 136.9, 132.9, 128.4, 127.7, 126.9, 125.8, 122.2, 54.2, 49.4, 48.8, 48.2, 45.6$ . ESI-HRMS calcd for  $[\text{C}_{19}\text{H}_{17}\text{NO} + \text{Na}^+]$ : 298.1208, found 298.1205.

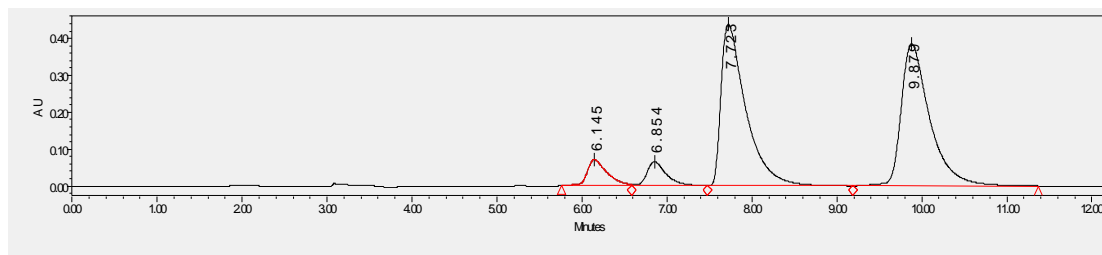

|   | Retention Time | Area    | % Area |
|---|----------------|---------|--------|
| 1 | 6.145          | 1168584 | 5.81   |
| 2 | 6.854          | 1057562 | 5.26   |
| 3 | 7.723          | 8892787 | 44.22  |
| 4 | 9.879          | 8993362 | 44.72  |

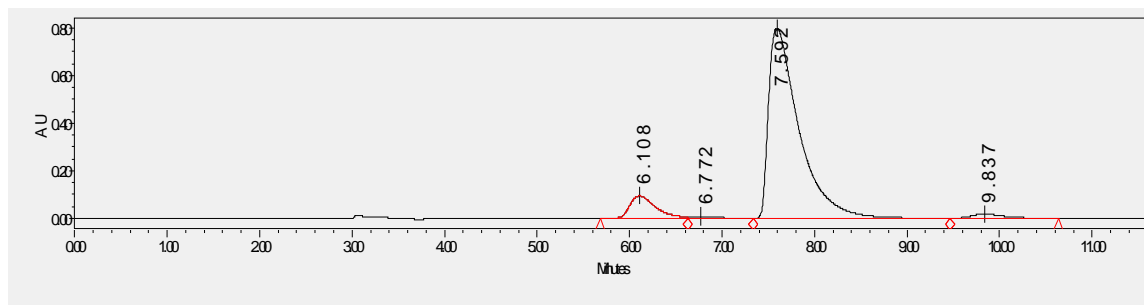

|   | Retention Time | Area     | % Area |
|---|----------------|----------|--------|
| 1 | 6.108          | 1828121  | 8.85   |
| 2 | 6.772          | 161746   | 0.78   |
| 3 | 7.592          | 18245128 | 88.37  |
| 4 | 9.837          | 411754   | 1.99   |

(1S,2R,3R,4R)-3-(4-fluorophenyl)bicyclo[2.2.1]hept-5-en-2-yl(pyridin-2-yl)methanone **5b**

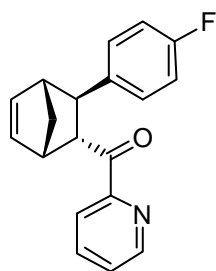

Yield: 25.2 mg (86%), colorless oil, 93:7 dr, 95% ee;  $[\alpha]_{D}^{12.7} = -132.6$  ( $c = 0.47$ ,  $\text{CH}_2\text{Cl}_2$ ); HPLC (Daicel chiralcel ADH, *n*-hexane/*i*-PrOH 95/5, 1.0 mL/min, 254 nm)  $t_{R(\text{major})} = 10.41$  min,  $t_{R(\text{minor})} = 8.26$  min;  $^1\text{H}$  NMR (400 MHz,  $\text{CDCl}_3$ )  $\delta$  8.60 (ddd,  $J = 4.4, 1.6, 0.8$  Hz, 1H), 7.96 – 7.90 (m, 1H), 7.75 (td,  $J = 7.6, 1.6$  Hz, 1H), 7.39 (ddd,  $J = 7.6, 4.8, 1.2$  Hz, 1H), 7.20 – 7.17 (m, 2H), 6.91 – 6.85 (m, 2H), 6.41 (dd,  $J = 5.6, 3.2$  Hz, 1H), 5.75 (dd,  $J = 5.6, 2.8$  Hz, 1H), 4.39 (dd,  $J = 5.2, 3.6$  Hz, 1H), 3.47 (s, 1H), 3.34 (d,  $J = 4.8$  Hz, 1H), 2.97 (d,  $J = 1.2$  Hz, 1H), 1.96 (d,  $J = 8.4$  Hz, 1H), 1.54 (dd,  $J = 8.8, 2.0$  Hz, 1H).  $^{13}\text{C}$  NMR (100 MHz,  $\text{CDCl}_3$ )  $\delta = 201.0, 161.6$  (d,  $J = 242$  Hz), 153.5, 148.9, 140.3, 139.4, 136.9, 132.9, 128.9 (d,  $J = 0.8$  Hz), 127.0, 122.3, 115.2 (d,  $J = 21.0$  Hz), 54.5, 49.4, 48.7, 48.2, 44.9. ESI-HRMS calcd for  $[\text{C}_{19}\text{H}_{16}\text{FNO} + \text{H}^+]$ : 294.1294, found 294.1292.

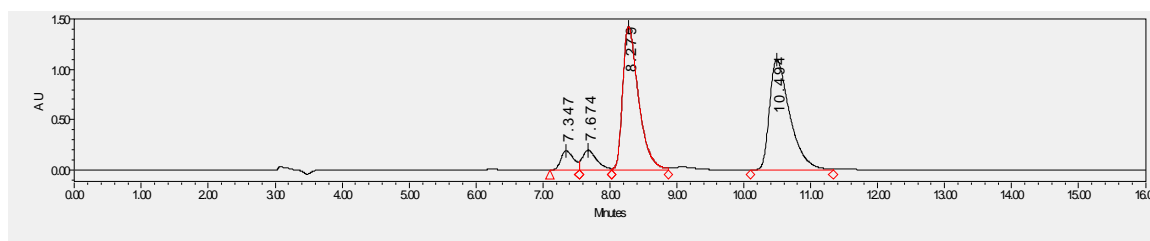

|   | Retention Time | Area     | % Area |
|---|----------------|----------|--------|
| 1 | 7.347          | 2510371  | 4.83   |
| 2 | 7.674          | 2913663  | 5.61   |
| 3 | 8.279          | 23414745 | 45.06  |
| 4 | 10.494         | 23126754 | 44.50  |

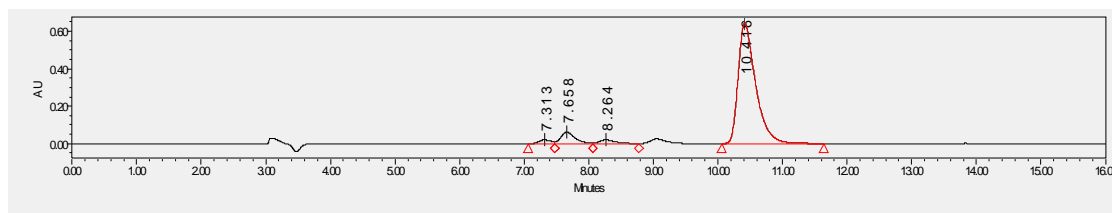

|   | Retention Time | Area     | % Area |
|---|----------------|----------|--------|
| 1 | 7.313          | 253709   | 1.87   |
| 2 | 7.658          | 932058   | 6.87   |
| 3 | 8.264          | 328303   | 2.42   |
| 4 | 10.416         | 12050878 | 88.84  |



(1S,2R,3R,4R)-3-(4-chlorophenyl)bicyclo[2.2.1]hept-5-en-2-yl(pyridin-2-yl)methanone **5c**

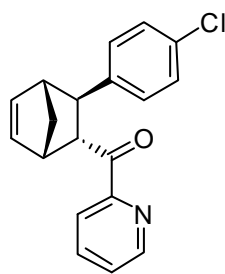

Yield: 27.8 mg (90%), colorless oil, 92:8 dr, 88% ee;  $[\alpha]^{10.6}_D = -132.4$  ( $c = 0.48$ ,  $\text{CH}_2\text{Cl}_2$ ); HPLC (Daicel chiralcel ADH, *n*-hexane/*i*-PrOH 95/5, 1.0 mL/min, 254 nm)  $t_{R(\text{major})} = 10.39$  min,  $t_{R(\text{minor})} = 8.90$  min;  $^1\text{H}$  NMR (400 MHz,  $\text{CDCl}_3$ )  $\delta$  8.61 (d,  $J = 4.4$  Hz, 1H), 7.93 (d,  $J = 7.6$  Hz, 1H), 7.76 (td,  $J = 7.6, 1.6$  Hz, 1H), 7.39 (ddd,  $J = 7.2, 4.8, 0.8$  Hz, 1H), 7.20 – 7.15 (m, 4H), 6.41 (dd,  $J = 5.2, 3.2$  Hz, 1H), 5.76 (dd,  $J = 5.2, 2.4$  Hz, 1H), 4.38 (dd,  $J = 4.8, 3.2$  Hz, 1H), 3.47 (s, 1H), 3.34 (dd,  $J = 4.8, 1.2$  Hz, 1H), 2.98 (s, 1H), 1.94 (d,  $J = 8.4$  Hz, 1H), 1.56 (d,  $J = 1.6$  Hz, 1H).  $^{13}\text{C}$  NMR (100 MHz,  $\text{CDCl}_3$ )  $\delta = 200.9, 153.4, 148.9, 143.2, 139.3, 136.9, 133.0, 131.5, 128.9, 128.4, 127.0, 122.3, 54.4, 49.3, 48.7, 48.2, 45.0$ . ESI-HRMS: calcd for  $[\text{C}_{19}\text{H}_{16}^{34.9689}\text{ClNO} + \text{Na}^+]$  332.0818, found 400.0811; ESI-HRMS: calcd for  $[\text{C}_{19}\text{H}_{16}^{36.9659}\text{ClNO} + \text{Na}^+]$  334.0789, found 402.0786.

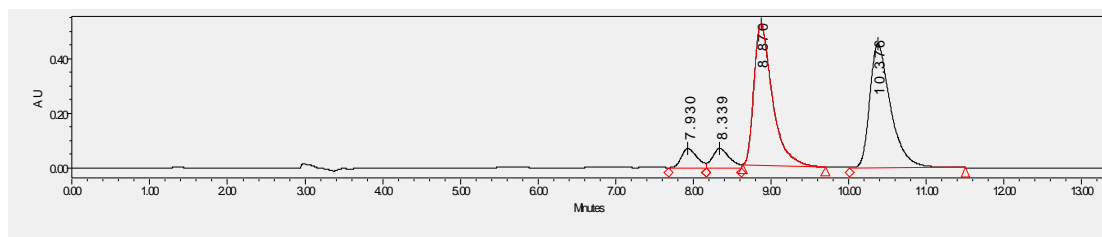

|   | Retention Time | Area    | % Area |
|---|----------------|---------|--------|
| 1 | 7.930          | 966341  | 5.10   |
| 2 | 8.339          | 1056042 | 5.57   |
| 3 | 8.870          | 8489093 | 44.80  |
| 4 | 10.376         | 8435721 | 44.52  |

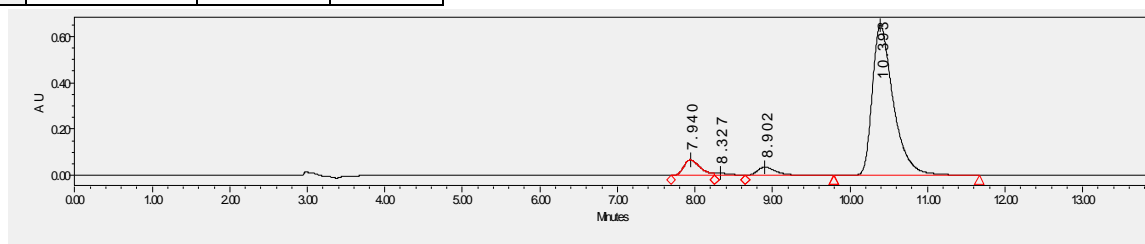

|   | Retention Time | Area     | % Area |
|---|----------------|----------|--------|
| 1 | 7.940          | 983477   | 7.06   |
| 2 | 8.327          | 128991   | 0.93   |
| 3 | 8.902          | 604612   | 4.34   |
| 4 | 10.393         | 12221224 | 87.68  |

(1S,2R,3R,4R)-3-(2-bromophenyl)bicyclo[2.2.1]hept-5-en-2-yl(pyridin-2-yl)methanone **5d**

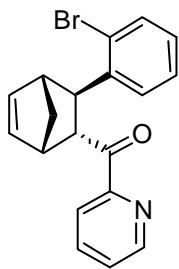

Yield: 28.9 mg (82%), colorless oil, 92:8 dr, 90% ee;  $[\alpha]_D^{25} = -91.5$  (c = 0.58, CH<sub>2</sub>Cl<sub>2</sub>); HPLC (Daicel chiralcel ADH, *n*-hexane/*i*-PrOH 95/5, 1.0 mL/min, 254 nm)  $t_{R(\text{major})} = 8.25$  min,  $t_{R(\text{minor})} = 7.20$  min; <sup>1</sup>H NMR (400 MHz, CDCl<sub>3</sub>) δ 8.59 (d, *J* = 4.4 Hz, 1H), 7.95 (d, *J* = 7.6 Hz, 1H), 7.75 (td, *J* = 7.6, 1.6 Hz, 1H), 7.46 (ddd, *J* = 10.8, 7.6, 1.2 Hz, 2H), 7.38 (ddd, *J* = 7.6, 4.0, 0.8 Hz, 1H), 7.25 – 7.20 (m, 1H), 6.98 (td, *J* = 8.0, 1.6 Hz, 1H), 6.46 (dd, *J* = 5.6, 3.2 Hz, 1H), 5.83 (dd, *J* = 5.6, 2.8 Hz, 1H), 4.61 (dd, *J* = 4.8, 3.6 Hz, 1H), 3.53 (d, *J* = 4.0 Hz, 1H), 3.41 (s, 1H), 2.99 (d, *J* = 1.2 Hz, 1H), 1.92 (d, *J* = 8.4 Hz, 1H), 1.52 (dd, *J* = 8.9, 1.6 Hz, 1H). <sup>13</sup>C NMR (100 MHz, CDCl<sub>3</sub>) δ = 200.4, 153.6, 148.8, 143.4, 138.5, 136.9, 133.7, 133.2, 127.9, 127.4, 127.2, 126.9, 126.4, 122.3, 51.2, 49.9, 48.5, 47.5, 46.3. ESI-HRMS: calcd for [C<sub>19</sub>H<sub>16</sub><sup>78.9183</sup>BrNO + Na<sup>+</sup>] 376.0313, found 376.0315; ESI-HRMS: calcd for [C<sub>19</sub>H<sub>16</sub><sup>80.9163</sup>BrNO + Na<sup>+</sup>] 378.0292, found 378.0287.

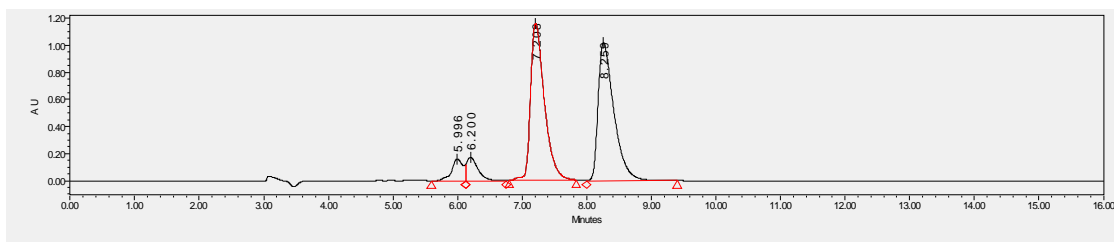

|   | Retention Time | Area     | % Area |
|---|----------------|----------|--------|
| 1 | 5.996          | 1983504  | 5.15   |
| 2 | 6.200          | 2054120  | 5.34   |
| 3 | 7.208          | 17258436 | 44.83  |
| 4 | 8.259          | 17203587 | 44.69  |

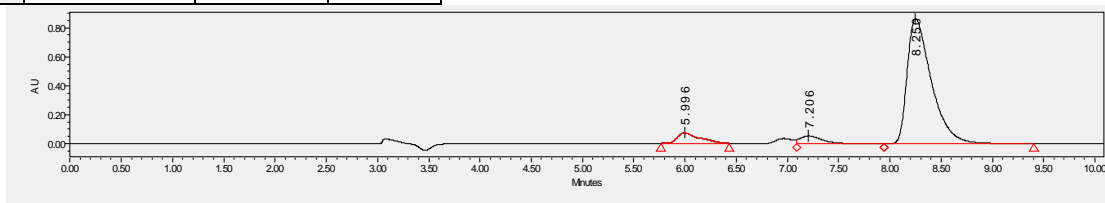

|   | Retention Time | Area     | % Area |
|---|----------------|----------|--------|
| 1 | 5.996          | 1067570  | 6.68   |
| 2 | 7.206          | 789406   | 4.94   |
| 3 | 8.250          | 14113809 | 88.37  |

(1S,2R,3R,4R)-3-(3-bromophenyl)bicyclo[2.2.1]hept-5-en-2-yl(pyridin-2-yl)methanone **5e**

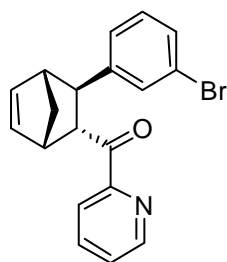

Yield: 26.2 mg (74%), colorless oil, 90:10 dr, 88% ee;  $[\alpha]_D^{25} = -133.9$  (c = 0.52, CH<sub>2</sub>Cl<sub>2</sub>); HPLC (Daicel chiralcel ID-Chiralpak Lux 5u Cellulose-2, *n*-hexane/*i*-PrOH 90/10, 0.9 mL/min, 254 nm)  $t_{R(\text{major})} = 13.94$  min,  $t_{R(\text{minor})} = 12.16$  min; <sup>1</sup>H NMR (400 MHz, CDCl<sub>3</sub>) δ 8.65 – 8.59 (m, 1H), 7.94 (d, *J* = 7.6 Hz, 1H), 7.76 (td, *J* = 7.6, 1.6 Hz, 1H), 7.42 – 7.36 (m, 2H), 7.21 – 7.13 (m, 2H), 7.06 (t, *J* = 8.0 Hz, 1H), 6.40 (dd, *J* = 5.6, 3.2 Hz, 0H), 5.75 (dd, *J* = 5.6, 2.4 Hz, 1H), 4.38 (dd, *J* = 5.2, 3.2 Hz, 1H), 3.49 (s, 0H), 3.34 (d, *J* = 4.4 Hz, 1H), 2.99 (d, *J* = 1.2 Hz, 1H), 1.96 (d, *J* = 8.4 Hz, 1H), 1.56 (dd, *J* = 8.4, 1.6 Hz, 1H). <sup>13</sup>C NMR (100 MHz, CDCl<sub>3</sub>) δ = 199.7, 152.3, 147.9, 146.1, 138.2, 135.9, 132.0, 129.5, 128.9, 127.9, 126.0, 125.4, 121.5, 121.2, 53.4, 48.1, 47.7, 47.2, 44.2. ESI-HRMS: calcd for [C<sub>19</sub>H<sub>16</sub><sup>78.9183</sup>BrNO + Na<sup>+</sup>] 376.0313, found 376.0309; ESI-HRMS: calcd for [C<sub>19</sub>H<sub>16</sub><sup>80.9163</sup>BrNO + Na<sup>+</sup>] 378.0292, found 378.0285.

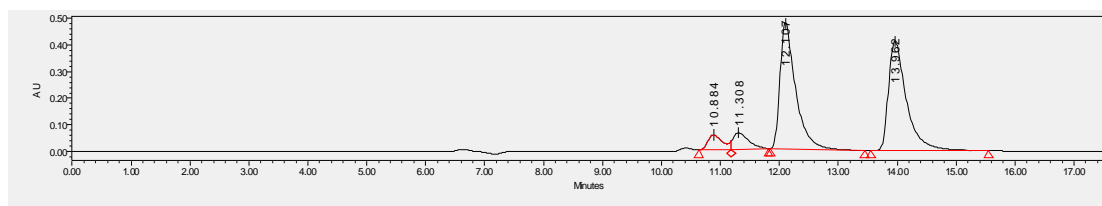

|   | Retention Time | Area    | % Area |
|---|----------------|---------|--------|
| 1 | 10.884         | 995501  | 5.06   |
| 2 | 11.308         | 1119589 | 5.69   |
| 3 | 12.107         | 8753920 | 44.50  |
| 4 | 13.962         | 8804460 | 44.75  |

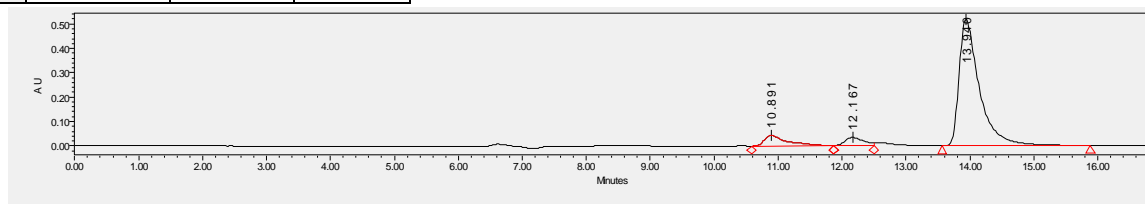

|   | Retention Time | Area     | % Area |
|---|----------------|----------|--------|
| 1 | 10.891         | 1143982  | 8.52   |
| 2 | 12.167         | 742971   | 5.53   |
| 3 | 13.940         | 11542197 | 85.95  |

(1S,2R,3R,4R)-3-(4-bromophenyl)bicyclo[2.2.1]hept-5-en-2-yl(pyridin-2-yl)methanone **5f**

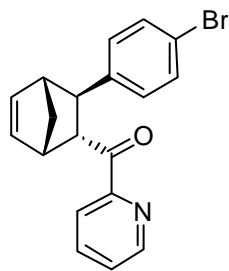

Yield: 29.1 mg (82%), colorless oil, 91:9 dr, 93% ee;  $[\alpha]_D^{25} = -117.5$  ( $c = 0.58$ ,  $\text{CH}_2\text{Cl}_2$ ); HPLC (Daicel chiralcel ADH, *n*-hexane/*i*-PrOH 95/5, 1.0 mL/min, 254 nm)  $t_{R(\text{major})} = 10.65$  min,  $t_{R(\text{minor})} = 9.42$  min;  $^1\text{H}$  NMR (400 MHz,  $\text{CDCl}_3$ )  $\delta$  8.68 (d,  $J = 4.4$  Hz, 1H), 8.00 (d,  $J = 8.0$  Hz, 1H), 7.81 (td,  $J = 8.0, 1.6$  Hz, 1H), 7.47 – 7.44 (m, 1H), 7.39 (d,  $J = 8.4$  Hz, 2H), 7.18 (d,  $J = 8.4$  Hz, 2H), 6.47 (dd,  $J = 5.2, 3.2$  Hz, 1H), 5.82 (dd,  $J = 4.8, 2.8$  Hz, 1H), 4.45 (dd,  $J = 5.2, 3.6$  Hz, 1H), 3.54 (s, 1H), 3.38 (d,  $J = 4.4$  Hz, 1H), 3.04 (s, 1H), 2.00 (d,  $J = 8.4$  Hz, 1H), 1.61 (dd,  $J = 8.8, 1.6$  Hz, 1H).  $^{13}\text{C}$  NMR (100 MHz,  $\text{CDCl}_3$ )  $\delta = 200.9, 153.4, 148.9, 143.7, 139.3, 136.9, 133.0, 131.4, 129.4, 127.0, 122.3, 119.6, 54.4, 49.2, 48.7, 48.2, 45.1$ . ESI-HRMS: calcd for  $[\text{C}_{19}\text{H}_{16}^{78,9183}\text{BrNO} + \text{Na}^+]$  376.0313, found 376.0307; ESI-HRMS: calcd for  $[\text{C}_{19}\text{H}_{16}^{80,9163}\text{BrNO} + \text{Na}^+]$  378.0292, found 378.0287.

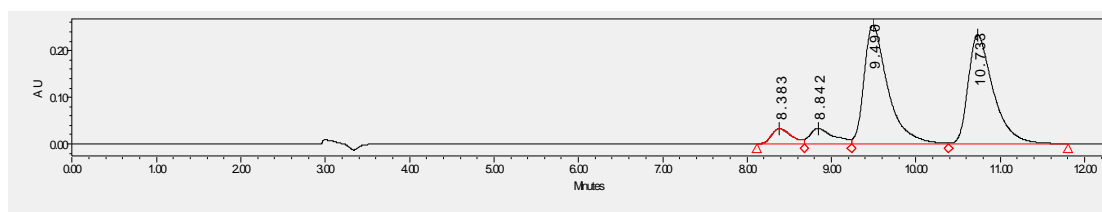

|   | Retention Time | Area    | % Area |
|---|----------------|---------|--------|
| 1 | 8.383          | 524459  | 4.80   |
| 2 | 8.842          | 640541  | 5.86   |
| 3 | 9.490          | 4955975 | 45.37  |
| 4 | 10.733         | 4801411 | 43.96  |

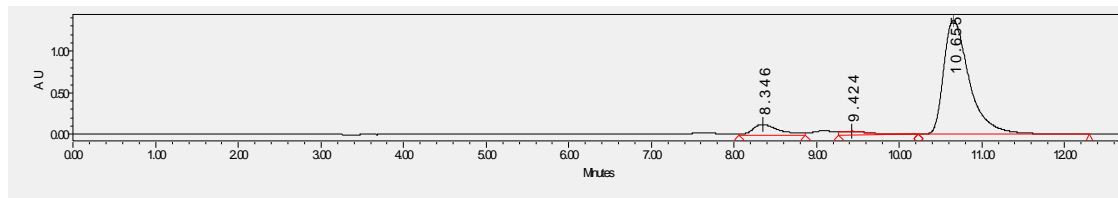

|   | Retention Time | Area     | % Area |
|---|----------------|----------|--------|
| 1 | 8.346          | 2724355  | 8.08   |
| 2 | 9.424          | 1044746  | 3.10   |
| 3 | 10.655         | 29966718 | 88.83  |

Pyridin-2-yl((1S,2R,3R,4R)-3-(p-tolyl)bicyclo[2.2.1]hept-5-en-2-yl)methanone **5g**

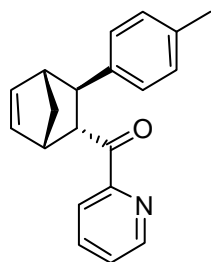

Yield: 24.2 mg (84%), colorless oil, 94:6 dr, 94% ee;  $[\alpha]_D^{25} = -165.9$  (c = 0.48, CH<sub>2</sub>Cl<sub>2</sub>); HPLC (Daicel chiralcel ODH, *n*-hexane/*i*-PrOH 95/5, 1.0 mL/min, 254 nm)  $t_{R(\text{major})} = 5.79$  min,  $t_{R(\text{minor})} = 7.04$  min; <sup>1</sup>H NMR (400 MHz, CDCl<sub>3</sub>) δ 8.60 (ddd, *J* = 4.8, 1.6, 0.8 Hz, 1H), 7.93 (d, *J* = 7.6 Hz, 1H), 7.74 (td, *J* = 7.6, 1.6 Hz, 1H), 7.37 (ddd, *J* = 7.2, 4.8, 1.2 Hz, 1H), 7.14 (d, *J* = 8.0 Hz, 2H), 7.01 (d, *J* = 8.0 Hz, 2H), 6.42 (dd, *J* = 5.6, 3.2 Hz, 1H), 5.74 (dd, *J* = 5.6, 2.8 Hz, 1H), 4.45 (dd, *J* = 5.2, 3.6 Hz, 1H), 3.46 (s, 1H), 3.33 (d, *J* = 4.8 Hz, 1H), 2.97 (d, *J* = 1.6 Hz, 1H), 2.23 (s, 1H), 1.99 (d, *J* = 8.4 Hz, 1H), 1.52 (dd, *J* = 8.4, 2.0 Hz, 1H). <sup>13</sup>C NMR (100 MHz, CDCl<sub>3</sub>) δ = 201.2, 153.6, 148.9, 141.6, 139.5, 136.8, 135.3, 132.8, 129.1, 127.6, 126.9, 122.2, 54.2, 49.6, 48.7, 48.2, 45.3, 20.9. ESI-HRMS calcd for [C<sub>20</sub>H<sub>19</sub>NO + H<sup>+</sup>]: 290.1545 found 290.1545.

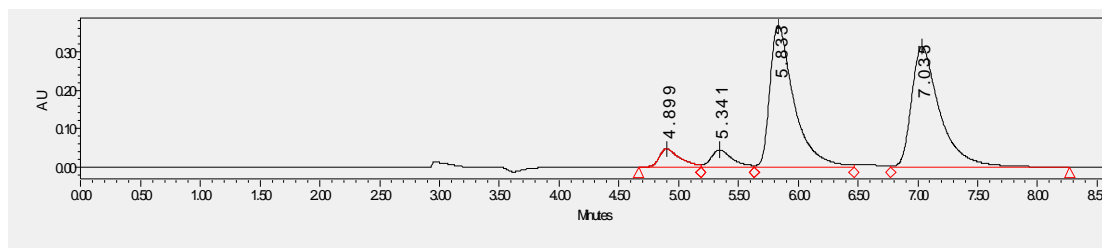

|   | Retention Time | Area    | % Area |
|---|----------------|---------|--------|
| 1 | 4.899          | 573869  | 5.03   |
| 2 | 5.341          | 552634  | 4.84   |
| 3 | 5.833          | 5141228 | 45.07  |
| 4 | 7.035          | 5139210 | 45.05  |

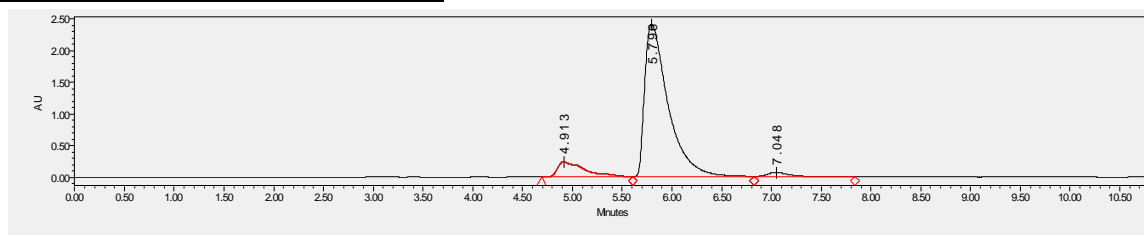

|   | Retention Time | Area     | % Area |
|---|----------------|----------|--------|
| 1 | 4.913          | 4702711  | 10.26  |
| 2 | 5.796          | 39820456 | 86.85  |
| 3 | 7.048          | 1323996  | 2.89   |

(1S,2R,3R,4R)-3-(4-methoxyphenyl)bicyclo[2.2.1]hept-5-en-2-yl(pyridin-2-yl)methanone **5h**

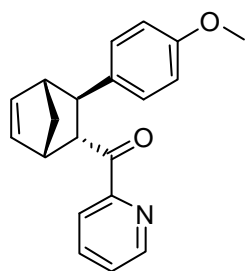

Yield: 20.2 mg (77%), colorless oil, 95:5 dr, 96% ee;  $[\alpha]_D^{25} = -159.6$  (c = 0.40, CH<sub>2</sub>Cl<sub>2</sub>); HPLC (Daicel chiralcel ADH, *n*-hexane/*i*-PrOH 90/10, 1.0 mL/min, 254 nm)  $t_{R(\text{major})} = 13.60$  min,  $t_{R(\text{minor})} = 10.57$  min; <sup>1</sup>H NMR (400 MHz, CDCl<sub>3</sub>) δ 8.61 (ddd, *J* = 4.8, 1.6, 0.8 Hz, 1H), 7.93 (dd, *J* = 6.8, 0.8 Hz, 1H), 7.75 (td, *J* = 7.6, 2.0 Hz, 1H), 7.38 (ddd, *J* = 7.6, 4.8, 1.2 Hz, 1H), 7.19 – 7.14 (m, 2H), 6.79 – 6.69 (m, 2H), 6.41 (dd, *J* = 5.6, 3.2 Hz, 1H), 5.74 (dd, *J* = 5.6, 2.8 Hz, 1H), 4.42 (dd, *J* = 5.2, 3.6 Hz, 1H), 3.70 (s, 3H), 3.45 (s, 1H), 3.31 (d, *J* = 4.0 Hz, 1H), 2.95 (d, *J* = 1.2 Hz, 1H), 1.99 (d, *J* = 8.4 Hz, 1H), 1.53 (dd, *J* = 8.4, 1.6 Hz, 1H). <sup>13</sup>C NMR (100 MHz, CDCl<sub>3</sub>) δ = 201.2, 157.7, 153.6, 148.9, 139.5, 136.9, 136.7, 132.7, 128.6, 126.9, 122.2, 113.8, 55.3, 54.3, 49.7, 48.7, 48.2, 44.9. ESI-HRMS calcd for [C<sub>20</sub>H<sub>19</sub>NO<sub>2</sub> + Na<sup>+</sup>]: 328.1313 found 328.1304.

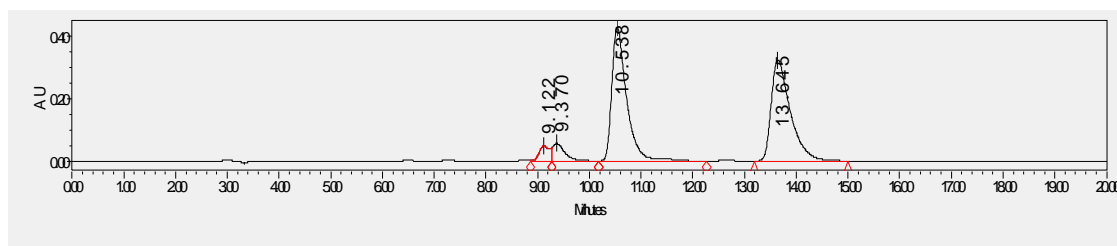

|   | Retention Time | Area    | % Area |
|---|----------------|---------|--------|
| 1 | 9.122          | 678662  | 3.70   |
| 2 | 9.370          | 910517  | 4.96   |
| 3 | 10.538         | 8496215 | 46.29  |
| 4 | 13.645         | 8269338 | 45.05  |

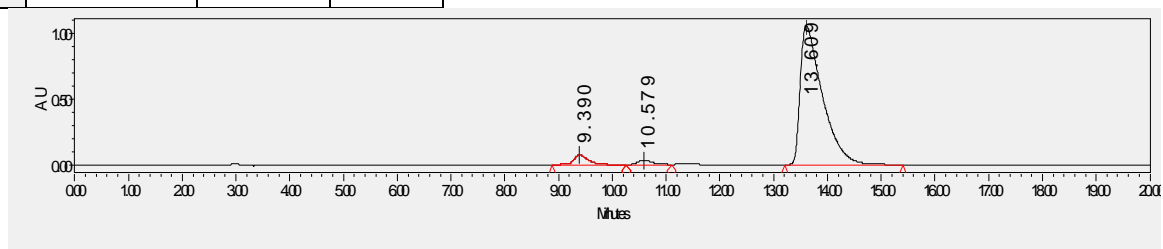

|   | Retention Time | Area     | % Area |
|---|----------------|----------|--------|
| 1 | 9.390          | 1415444  | 4.38   |
| 2 | 10.579         | 681190   | 2.11   |
| 3 | 13.609         | 30231216 | 93.51  |

(1S,2R,3R,4R)-3-(furan-2-yl)bicyclo[2.2.1]hept-5-en-2-yl(pyridin-2-yl)methanone **5i**

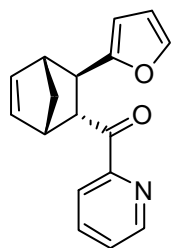

Yield: 20.5 mg (77%), colorless oil, 94:6 dr, 94% ee;  $[\alpha]^{14.2}_D = -120.9$  ( $c = 0.41$ ,  $\text{CH}_2\text{Cl}_2$ ); HPLC (Daicel chiralcel ADH, *n*-hexane/*i*-PrOH 98/2, 1.0 mL/min, 254 nm)  $t_{R(\text{major})} = 11.86$  min,  $t_{R(\text{minor})} = 11.18$  min;  $^1\text{H}$  NMR (400 MHz,  $\text{CDCl}_3$ )  $\delta$  8.64 (d,  $J = 4.0$  Hz, 1H), 7.93 (d,  $J = 8.0$  Hz, 1H), 7.75 (td,  $J = 7.6, 1.6$  Hz, 1H), 7.40 (ddd,  $J = 7.6, 4.8, 1.2$  Hz, 1H), 7.24 (d,  $J = 0.8$  Hz, 1H), 6.34 (dd,  $J = 5.6, 3.2$  Hz, 1H), 6.20 (dd,  $J = 3.2, 2.0$  Hz, 1H), 6.03 (d,  $J = 3.2$  Hz, 1H), 5.72 (dd,  $J = 5.6, 2.8$  Hz, 1H), 4.52 (dd,  $J = 4.8, 3.6$  Hz, 1H), 3.46 (s, 1H), 3.32 (d,  $J = 4.0$  Hz, 1H), 3.00 (d,  $J = 1.6$  Hz, 1H), 1.97 (d,  $J = 8.4$  Hz, 1H), 1.49 (dd,  $J = 8.4, 1.6$  Hz, 1H).  $^{13}\text{C}$  NMR (100 MHz,  $\text{CDCl}_3$ )  $\delta = 200.4, 158.1, 153.4, 148.9, 141.1, 138.4, 136.9, 132.8, 126.9, 122.3, 110.1, 104.8, 52.2, 49.2, 48.6, 48.2, 39.7$ . ESI-HRMS calcd for  $[\text{C}_{17}\text{H}_{15}\text{NO}_2 + \text{Na}^+]$ : 288.1000, found 288.0996.

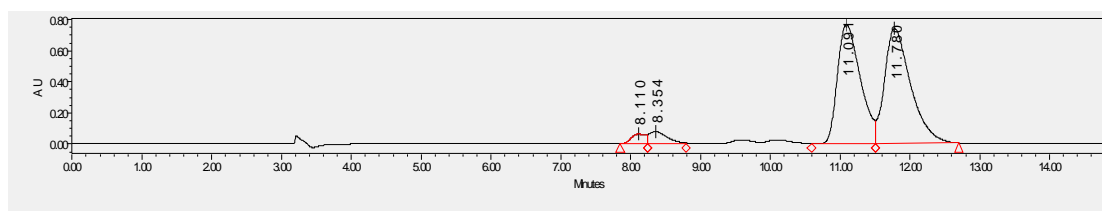

|   | Retention Time | Area     | % Area |
|---|----------------|----------|--------|
| 1 | 8.110          | 873514   | 2.26   |
| 2 | 8.354          | 1361632  | 3.52   |
| 3 | 11.091         | 17309949 | 44.77  |
| 4 | 11.780         | 19120757 | 49.45  |

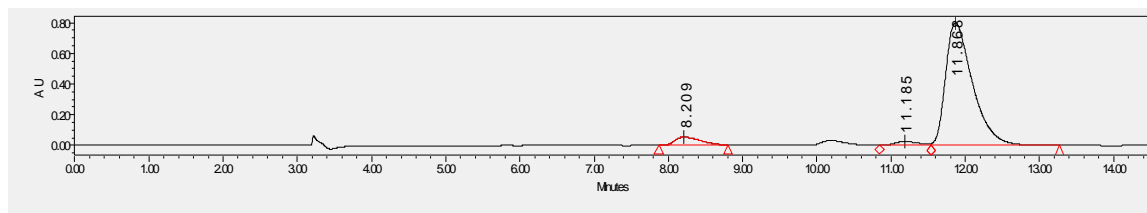

|   | Retention Time | Area     | % Area |
|---|----------------|----------|--------|
| 1 | 8.209          | 1256417  | 5.71   |
| 2 | 11.185         | 578678   | 2.63   |
| 3 | 11.868         | 20157900 | 91.66  |

(1S,2R,3R,4R)-3-(furan-3-yl)bicyclo[2.2.1]hept-5-en-2-yl(pyridin-2-yl)methanone **5j**

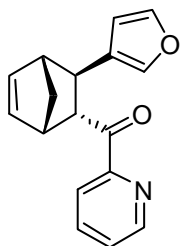

Yield: 17.4 mg (66%), colorless oil, 94:6 dr, 96% ee;  $[\alpha]^{12.3}_D = -136.5$  ( $c = 0.35$ ,  $\text{CH}_2\text{Cl}_2$ ); HPLC (Daicel chiralcel ODH, *n*-hexane/*i*-PrOH 99/1, 1.0 mL/min, 254 nm)  $t_{R(\text{major})} = 10.33$  min,  $t_{R(\text{minor})} = 11.80$  min;  $^1\text{H}$  NMR (400 MHz,  $\text{CDCl}_3$ )  $\delta$  8.64 (d,  $J = 4.4$  Hz, 1H), 7.92 (d,  $J = 8.0$  Hz, 1H), 7.76 (td,  $J = 7.6, 1.6$  Hz, 1H), 7.40 (ddd,  $J = 7.6, 4.8, 1.2$  Hz, 1H), 7.29 – 7.24 (m, 2H), 6.36 (dd,  $J = 5.6, 3.2$  Hz, 1H), 6.27 (d,  $J = 0.8$  Hz, 1H), 5.71 (dd,  $J = 5.6, 2.8$  Hz, 1H), 4.34 (dd,  $J = 4.8, 3.2$  Hz, 1H), 3.43 (s, 1H), 3.14 (d,  $J = 4.8$  Hz, 1H), 2.87 (d,  $J = 1.6$  Hz, 1H), 1.86 (d,  $J = 8.4$  Hz, 1H), 1.50 (dd,  $J = 8.4, 1.6$  Hz, 1H).  $^{13}\text{C}$  NMR (100 MHz,  $\text{CDCl}_3$ )  $\delta = 200.9, 153.5, 148.9, 142.8, 138.7, 138.6, 136.9, 132.4, 128.7, 126.9, 122.2, 110.8, 53.6, 49.8, 48.5, 48.4, 37.1$ . ESI-HRMS calcd for  $[\text{C}_{17}\text{H}_{15}\text{NO}_2 + \text{Na}^+]$ : 288.1000, found 288.1002.

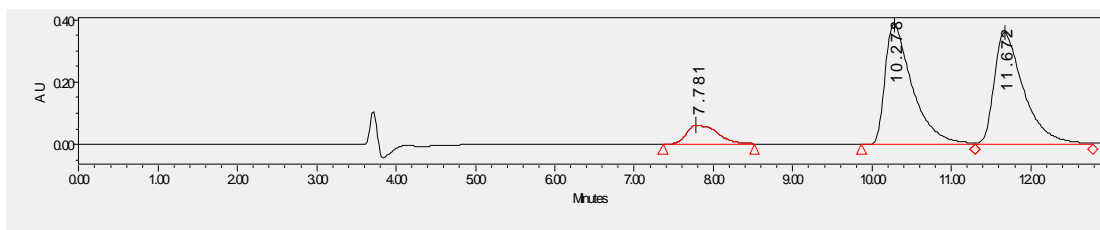

|   | Retention Time | Area    | % Area |
|---|----------------|---------|--------|
| 1 | 7.781          | 1616374 | 8.02   |
| 2 | 10.278         | 9233618 | 45.84  |
| 3 | 11.672         | 9293263 | 46.14  |

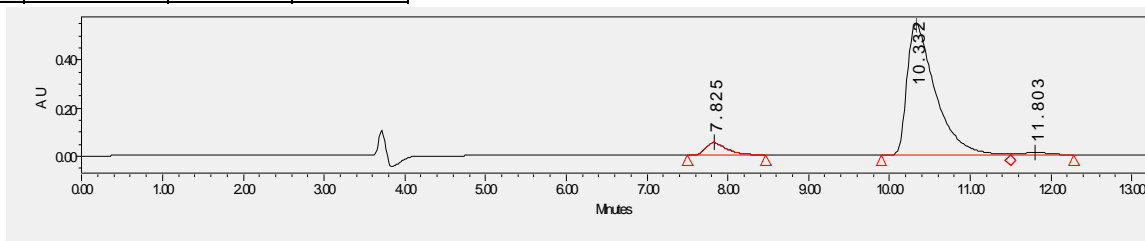

|   | Retention Time | Area     | % Area |
|---|----------------|----------|--------|
| 1 | 7.825          | 979526   | 6.72   |
| 2 | 10.332         | 13325998 | 91.45  |
| 3 | 11.803         | 266252   | 1.83   |



Pyridin-2-yl((1S,2R,3R,4R)-3-(thiophen-2-yl)bicyclo[2.2.1]hept-5-en-2-yl)methanone **5k**

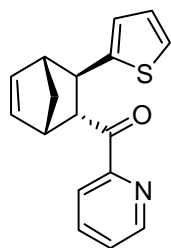

Yield: 23.3 mg (83%), white solid, 94:6 dr, 94% ee;  $[\alpha]^{17.5}_D = -104.9$  ( $c = 0.47$ ,  $\text{CH}_2\text{Cl}_2$ ); HPLC (Daicel chiralcel ODH, *n*-hexane/*i*-PrOH 98/2, 1.0 mL/min, 254 nm)  $t_{R(\text{major})} = 6.41$  min,  $t_{R(\text{minor})} = 7.23$  min;  $^1\text{H}$  NMR (400 MHz,  $\text{CDCl}_3$ )  $\delta$  8.63 (ddd,  $J = 4.8, 2.0, 1.2$  Hz, 1H), 7.96 – 7.89 (m, 1H), 7.75 (td,  $J = 7.6, 1.6$  Hz, 1H), 7.39 (ddd,  $J = 7.6, 4.8, 1.2$  Hz, 1H), 7.09 – 7.01 (m, 1H), 6.88 – 6.79 (m, 2H), 6.38 (dd,  $J = 5.6, 3.2$  Hz, 1H), 5.73 (dd,  $J = 5.6, 2.8$  Hz, 1H), 4.50 (dd,  $J = 4.8, 3.6$  Hz, 1H), 3.56 (dd,  $J = 4.8, 1.6$  Hz, 1H), 3.48 (s, 1H), 2.98 (s, 1H), 2.04 (d,  $J = 8.4$  Hz, 1H), 1.57 (dd,  $J = 8.4, 1.6$  Hz, 1H).  $^{13}\text{C}$  NMR (100 MHz,  $\text{CDCl}_3$ )  $\delta = 200.4, 153.4, 149.0, 148.9, 138.7, 136.9, 132.7, 127.0, 126.7, 123.7, 123.0, 122.3, 55.7, 51.5, 48.6, 48.6, 41.6$ . ESI-HRMS calcd for  $[\text{C}_{17}\text{H}_{15}\text{NOS} + \text{Na}^+]$ : 304.0772, found 304.0763.

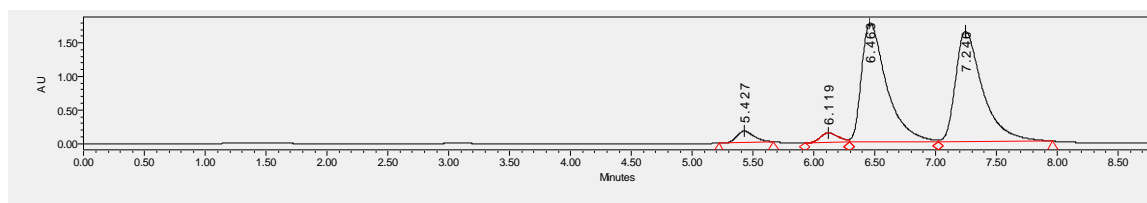

|   | Retention Time | Area     | % Area |
|---|----------------|----------|--------|
| 1 | 5.427          | 1714771  | 3.15   |
| 2 | 6.119          | 1512808  | 2.78   |
| 3 | 6.463          | 25599509 | 46.98  |
| 4 | 7.246          | 25663800 | 47.10  |

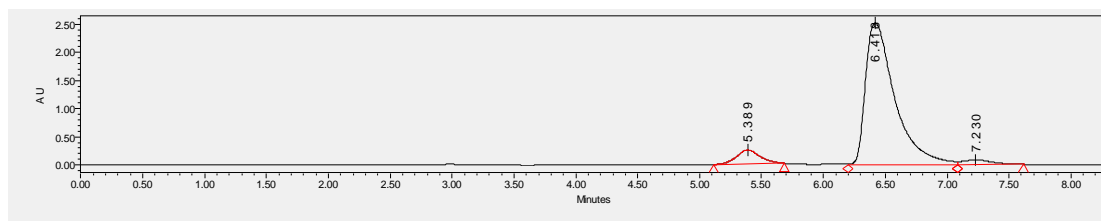

|   | Retention Time | Area     | % Area |
|---|----------------|----------|--------|
| 1 | 5.389          | 3314705  | 7.21   |
| 2 | 6.418          | 41354150 | 89.92  |
| 3 | 7.230          | 1320626  | 2.87   |

Pyridin-2-yl((1S,2R,3R,4R)-3-(thiophen-3-yl)bicyclo[2.2.1]hept-5-en-2-yl)methanone **51**

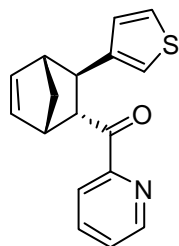

Yield: 21.1 mg (75%), white solid, 95:5 dr, 94% ee;  $[\alpha]^{14.9}_D = -109.1$  ( $c = 0.42$ ,  $\text{CH}_2\text{Cl}_2$ ); HPLC (Daicel chiralcel ODH, *n*-hexane/*i*-PrOH 98/2, 1.0 mL/min, 254 nm)  $t_{R(\text{major})} = 9.30$  min,  $t_{R(\text{minor})} = 10.57$  min;  $^1\text{H NMR}$  (400 MHz,  $\text{CDCl}_3$ )  $\delta$  8.63 (d,  $J = 4.4$  Hz, 1H), 7.93 (d,  $J = 8.0$  Hz, 1H), 7.75 (td,  $J = 7.6, 1.6$  Hz, 1H), 7.39 (dd,  $J = 6.4, 4.8$  Hz, 1H), 7.17 (dd,  $J = 4.8, 2.8$  Hz, 1H), 7.02 – 6.88 (m, 2H), 6.38 (dd,  $J = 5.6, 3.2$  Hz, 1H), 5.73 (dd,  $J = 5.6, 2.8$  Hz, 1H), 4.45 (dd,  $J = 4.8, 3.6$  Hz, 1H), 3.45 (s, 1H), 3.36 (d,  $J = 4.8$  Hz, 1H), 2.98 (d,  $J = 1.2$  Hz, 1H), 1.94 (d,  $J = 8.4$  Hz, 1H), 1.53 (dd,  $J = 8.4, 1.6$  Hz, 1H).  $^{13}\text{C NMR}$  (100 MHz,  $\text{CDCl}_3$ )  $\delta = 200.9, 153.5, 148.9, 145.8, 138.9, 136.9, 132.6, 128.2, 126.9, 125.3, 122.2, 119.4, 54.0, 49.9, 48.6, 48.4, 41.6$ . ESI-HRMS calcd for  $[\text{C}_{17}\text{H}_{15}\text{NOS} + \text{Na}^+]$ : 304.0772, found 304.0773.

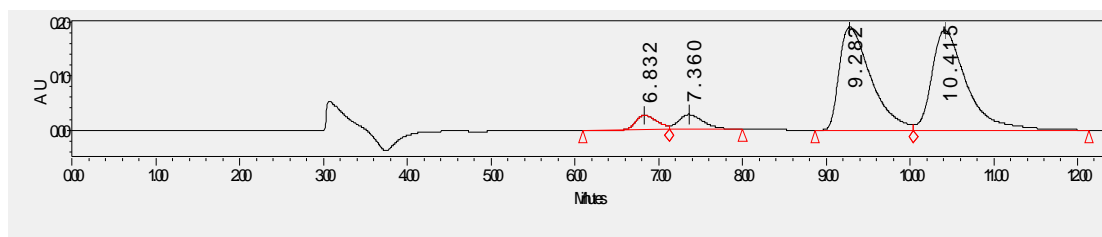

|   | Retention Time | Area    | % Area |
|---|----------------|---------|--------|
| 1 | 6.832          | 475446  | 4.20   |
| 2 | 7.360          | 564852  | 4.99   |
| 3 | 9.282          | 4988934 | 44.04  |
| 4 | 10.415         | 5298160 | 46.77  |

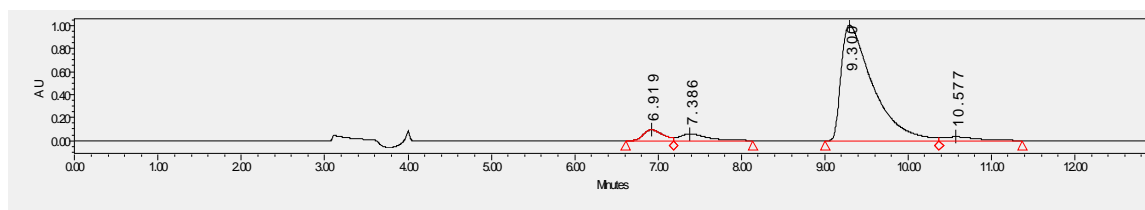

|   | Retention Time | Area     | % Area |
|---|----------------|----------|--------|
| 1 | 6.919          | 1489575  | 4.99   |
| 2 | 7.386          | 1236658  | 4.14   |
| 3 | 9.300          | 26323483 | 88.16  |
| 4 | 10.577         | 810476   | 2.71   |

(1S,2R,3R,4R)-3-cyclohexylbicyclo[2.2.1]hept-5-en-2-yl(pyridin-2-yl)methanone **5m**

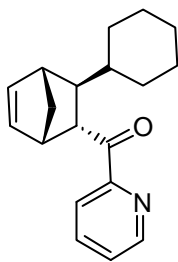

Yield: 22.1 mg (79%), colorless oil, 77:23 dr, 96% ee; HPLC (Daicel chiralcel ADH, *n*-hexane/*i*-PrOH 98/2, 1.0 mL/min, 254 nm)  $t_{R(\text{major})} = 6.09$  min,  $t_{R(\text{minor})} = 6.99$  min;  $^1\text{H NMR}$  (400 MHz,  $\text{CDCl}_3$ )  $\delta$  8.72 (d,  $J = 4.4$  Hz, 1H), 8.06 (d,  $J = 7.6$  Hz, 0.23H), 7.98 (d,  $J = 8.0$  Hz, 0.77H), 7.82 (t,  $J = 7.2$  Hz, 1H), 7.47 (t,  $J = 5.6$  Hz, 1H), 6.33 (s, 1H), 6.19 (s, 0.23H), 5.69 (t,  $J = 2.4$  Hz, 0.77H), 4.12 (s, 0.78H), 3.51 (d,  $J = 4.4$  Hz, 0.22H), 3.30 (s, 0.75H), 3.00 (s, 0.25H), 2.89 (d,  $J = 16.8$  Hz, 1H), 1.99 – 1.56 (m, 7H), 1.29 – 0.85 (m, 7H).  $^{13}\text{C NMR}$  (100 MHz,  $\text{CDCl}_3$ )  $\delta$  201.9, 153.7, 148.8, 139.4, 136.9, 131.7, 126.8, 122.2, 51.4, 48.5, 48.1, 47.8, 44.7, 42.3, 32.9, 32.5, 26.6, 26.5, 26.3. ESI-HRMS calcd for  $[\text{C}_{19}\text{H}_{23}\text{NO} + \text{H}^+]$ : 282.1852, found 282.1864.

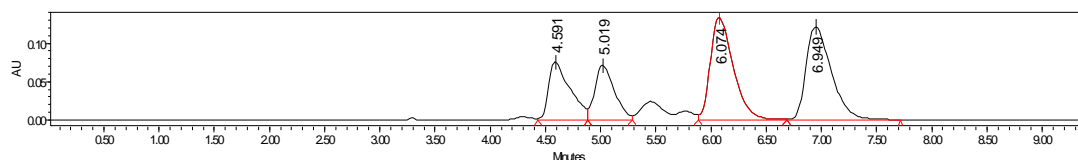

|   | Retention Time | Area    | % Area |
|---|----------------|---------|--------|
| 1 | 4.591          | 1032015 | 17.92  |
| 2 | 5.019          | 880697  | 15.29  |
| 3 | 6.074          | 1923229 | 33.39  |
| 4 | 6.949          | 1923134 | 33.39  |

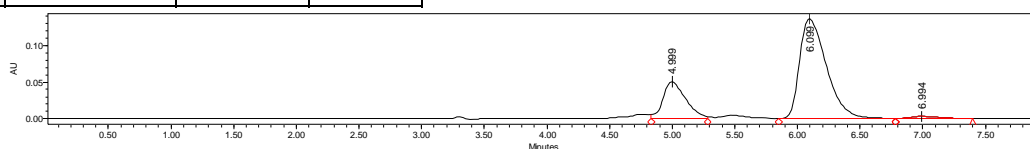

|   | Retention Time | Area    | % Area |
|---|----------------|---------|--------|
| 1 | 4.999          | 622921  | 23.18  |
| 2 | 6.099          | 2020720 | 75.20  |
| 3 | 6.994          | 43526   | 1.62   |

#### 4. Determination methods of relative and absolute configurations of products **5**

The relative and absolute configurations of products **5** were determined by optical rotations and spectral data. The configuration of **5a** was the opposite enantiomer of the product reported in the literature.<sup>3</sup>

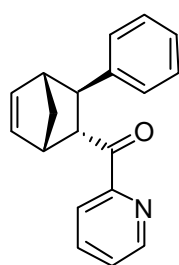

DA product *endo*-**5a** (93:7 dr and 96% ee) we obtained:  $[\alpha]^{18.6}_D = -184.6$  ( $c = 0.51$ ,  $\text{CHCl}_3$ ).

HPLC (Daicel chiralcel ODH, *n*-hexane/*i*-PrOH 98/2, 1.0 mL/min, 254 nm)

Major *exo*  $t_R = 6.108$  min, minor *exo*  $t_R = 6.772$  min, major *endo* (-)  $t_R = 7.592$  min, minor *endo* (+)  $t_R = 9.837$  min.

<sup>1</sup>H NMR (400 MHz,  $\text{CDCl}_3$ )  $\delta$  8.60 (d,  $J = 4.4$  Hz, 1H), 7.94 (d,  $J = 8.0$  Hz, 1H), 7.74 (td,  $J = 7.6$ , 1.6 Hz, 1H), 7.37 (ddd,  $J = 7.6$ , 4.8, 1.2 Hz, 1H), 7.27 – 7.16 (m, 4H), 7.11 – 7.06 (m, 1H), 6.42 (dd,  $J = 5.6$ , 3.2 Hz, 1H), 5.75 (dd,  $J = 5.6$ , 2.8 Hz, 1H), 4.46 (dd,  $J = 5.2$ , 4.4 Hz, 1H), 3.47 (s, 1H), 3.38 (d,  $J = 4.4$  Hz, 1H), 3.01 (s, 1H), 2.00 (d,  $J = 8.4$  Hz, 1H), 1.54 (dd,  $J = 8.8$ , 2.0 Hz, 1H).

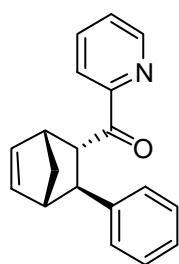

DA product *endo*-**5a** (>98% de and 90% ee) reported in literature:  $[\alpha]^{25}_D = +176.6$  ( $c = 0.81$ ,  $\text{CHCl}_3$ ).

HPLC (Daicel chiralcel ODH, *n*-hexane/*i*-PrOH 98/2, 1.0 mL/min, 254 nm)

Major *exo*  $t_R = 6.5$  min, minor *exo*  $t_R = 7.2$  min, minor *endo* (-)  $t_R = 7.9$  min, major *endo* (+)  $t_R = 9.5$  min.

<sup>1</sup>H NMR (300 MHz,  $\text{CDCl}_3$ )  $\delta$  8.67 (1H, d,  $J = 4.8$  Hz), 8.00 (1H, d,  $J = 7.8$  Hz), 7.81 (1H, dt,  $J = 1.7$ , 7.7 Hz), 7.44 (1H, ddd,  $J = 1.2$ , 4.8, 7.5 Hz), 7.37-7.22 (m, 4H), 7.15 (tt,  $J = 1.7$ , 6.9 Hz), 6.49 (1H, dd,  $J = 3.2$ , 5.6 Hz), 5.82 (1H, dd,  $J = 2.8$ , 5.6 Hz), 4.53 (1H, dd,  $J = 3.4$ , 5.2 Hz), 3.54 (1H, s), 3.45 (1H, dd,  $J = 1.3$ , 5.0 Hz), 3.08 (1H, s), 2.06 (1H, d,  $J = 8.4$  Hz), 1.61 (1H, dd,  $J = 1.7$ , 8.5 Hz).

#### 5. Experimental procedure for the reduction of **3d**

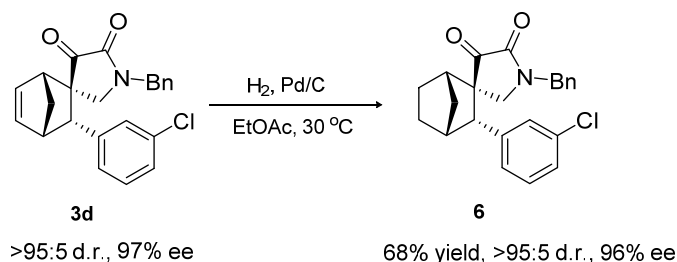

To a solution of **3d** (37.7 mg, 0.1 mmol) in EtOAc (1.0 mL) at 30 °C, under magnetic stirring

and hydrogen atmosphere, was added Pd/C (1.8 mg). The mixture was allowed to stir for 3 h. After complete consumption of starting material, the product **6** was purified on silica gel chromatography (EtOAc: Pet = 1: 3). The results were 68% yield, > 95:5 d.r. and 96% ee.

## 6. Gram scale experiment

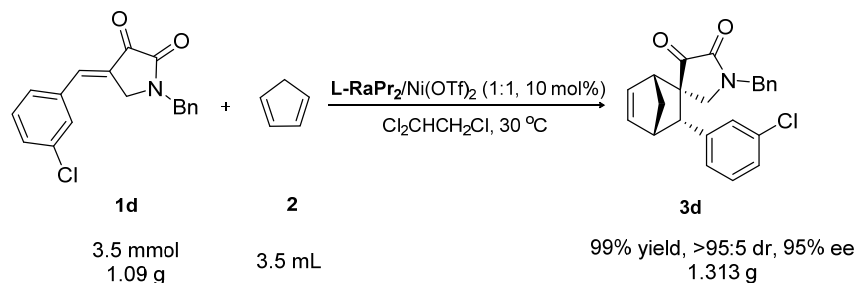

**L-RaPr<sub>2</sub>** (245 mg, 0.35 mmol), Ni(OTf)<sub>2</sub> (126 mg, 0.35 mmol), and **1d** (1.09 g, 3.5 mmol) in Cl<sub>2</sub>CHCH<sub>2</sub>Cl (3.5 mL) were added to an over-dried reaction tube under nitrogen atmosphere and then stirred at 30 °C for 1 h. Subsequently, cyclopentadiene **2** (3.5 mL) was added under 30 °C, the reaction mixture continued stirring for 1 h. After completion, the residue was purified by flash chromatography on silica gel to afford the desired product **3d** (1.313 g, 99% yield) as a white solid. The product was determined by HPLC and NMR analysis.

## 7. Operando IR experiments

Trends

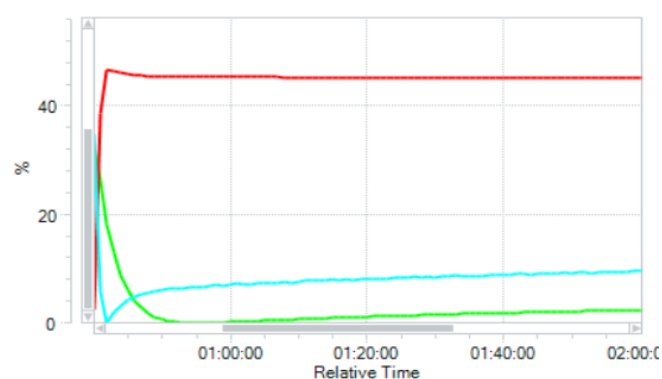

Peak at 1624 cm<sup>-1</sup> **1a**

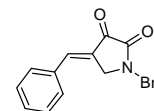

Peak at 1369 cm<sup>-1</sup> **2**

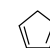

Peak at 709 cm<sup>-1</sup> **3a**

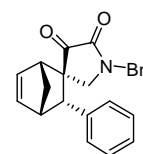

## 8. ESI-MS analysis of the solution of catalyst/substrate

17:16:36

160324\_LY\_L\_NI\_1A 17 (0.291) Cm (14:36)

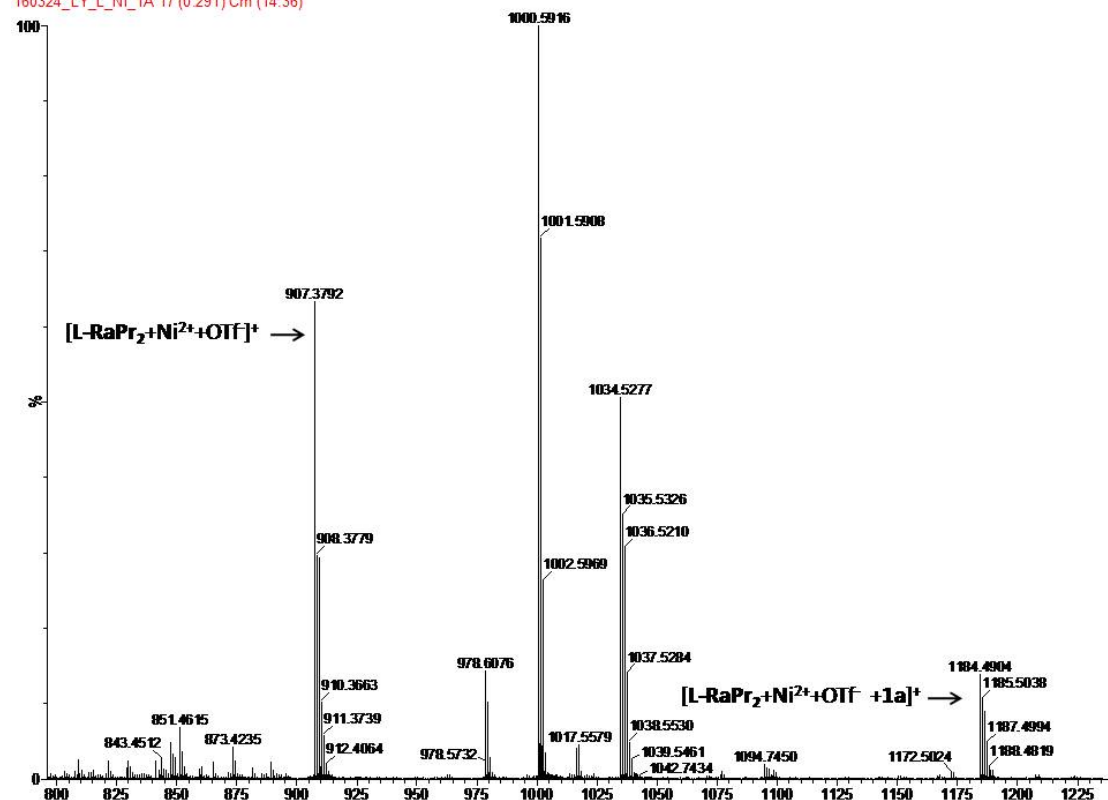

17:20:42

160324\_LY\_L\_NI\_4A 8 (0.137) Cm (3:36)

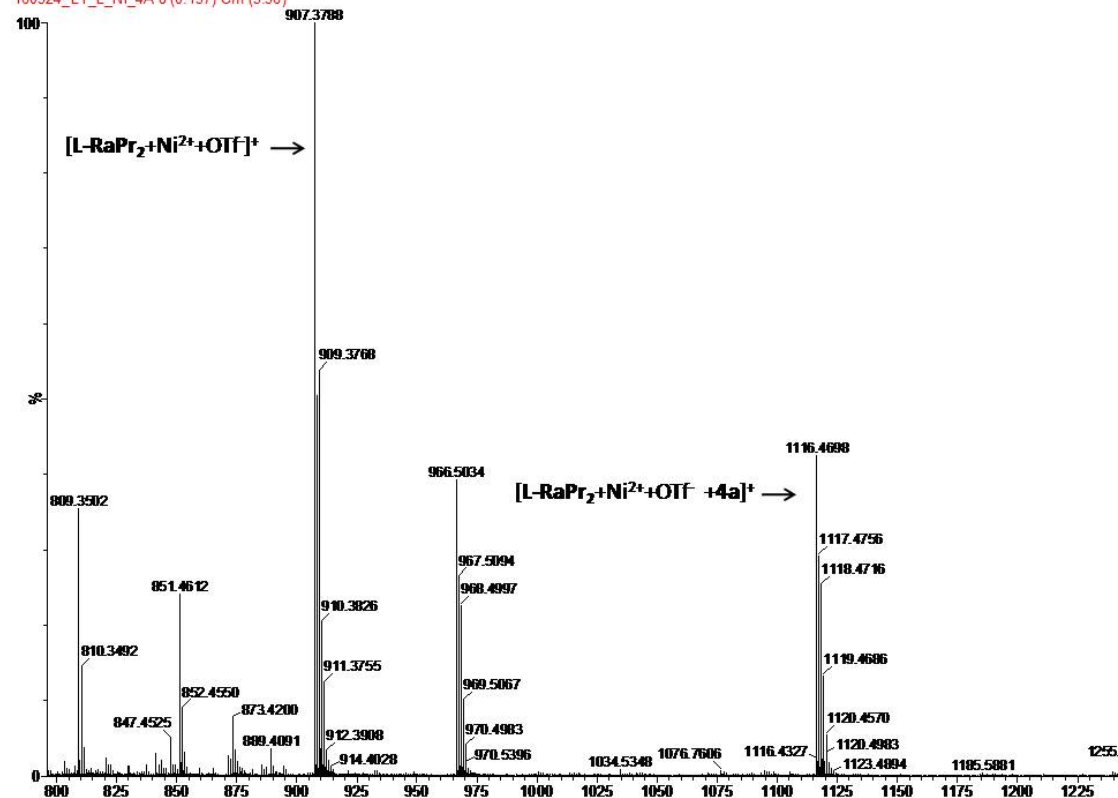

## 9. Copies of CD Spectra and their Absolute Configurations

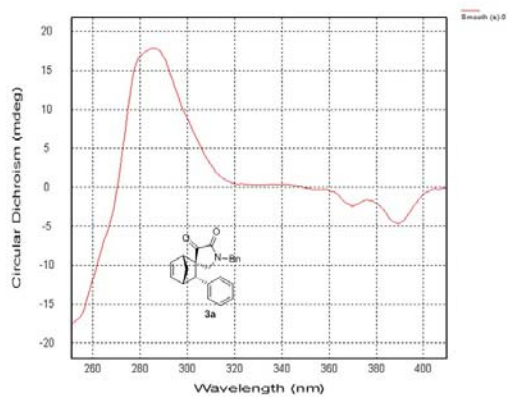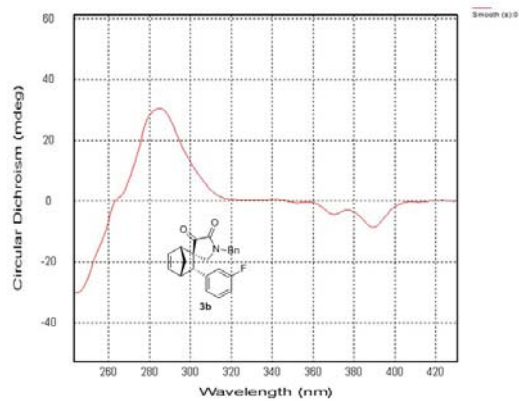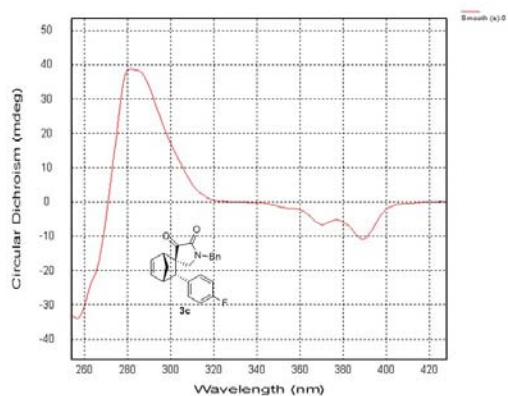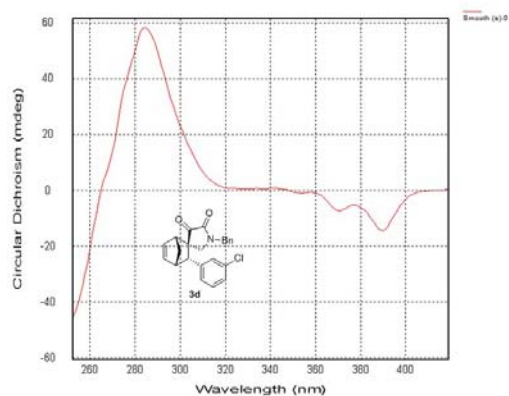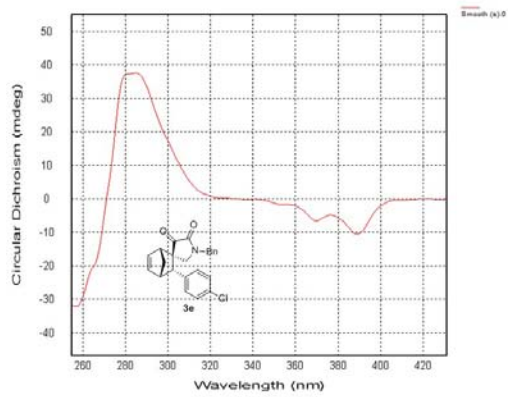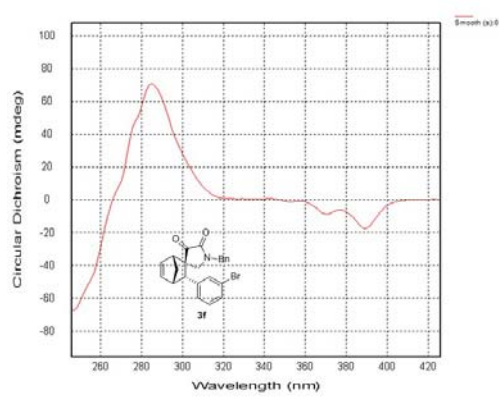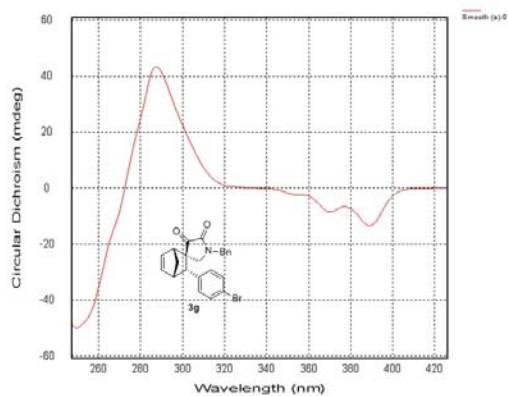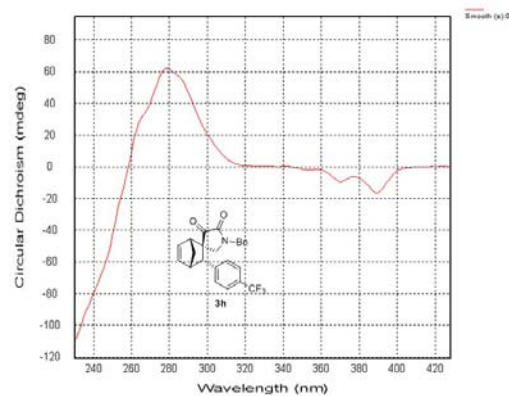



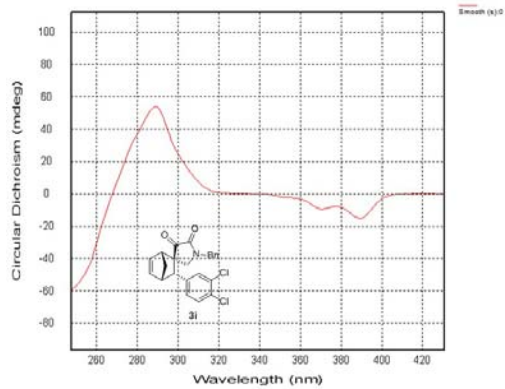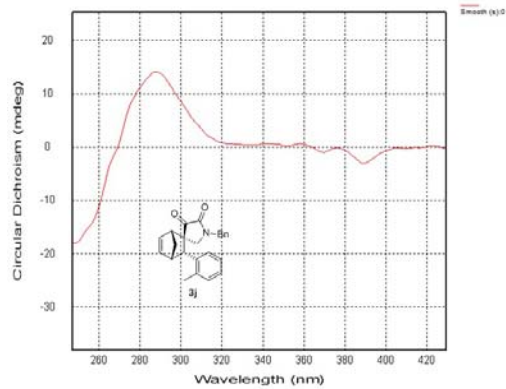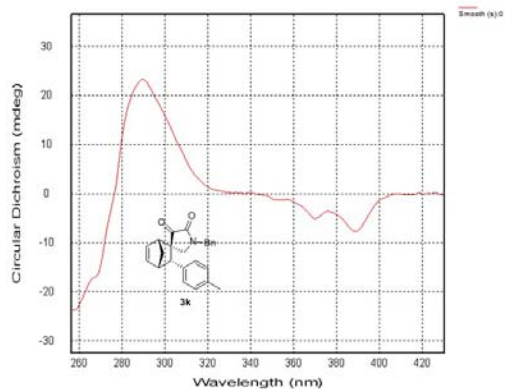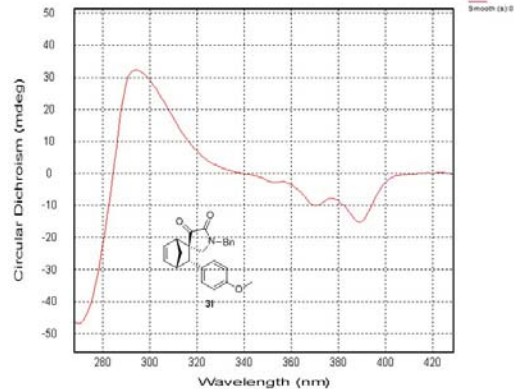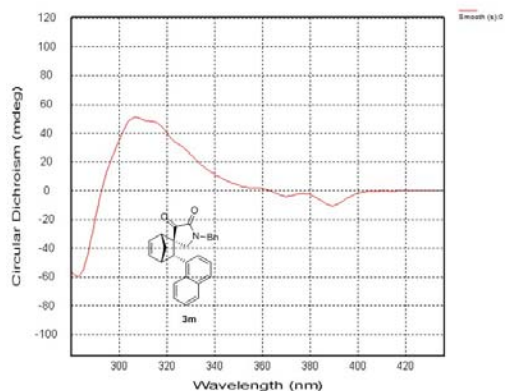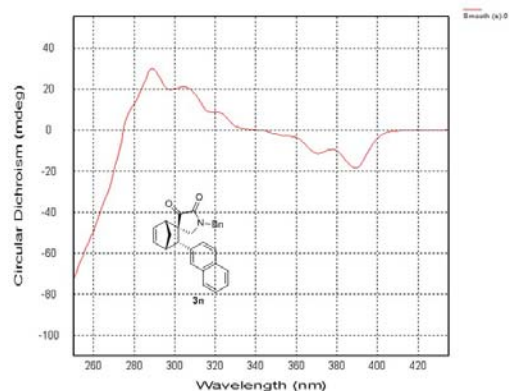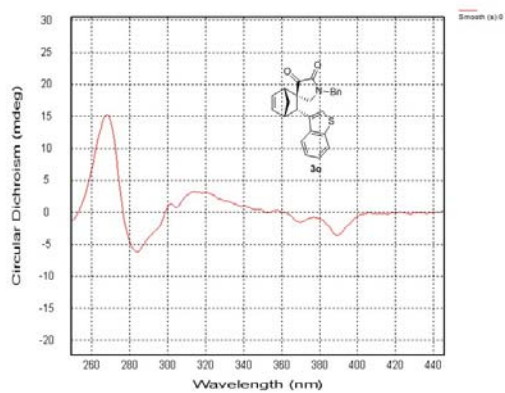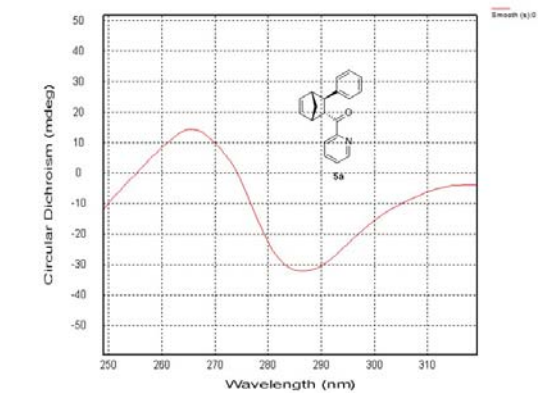



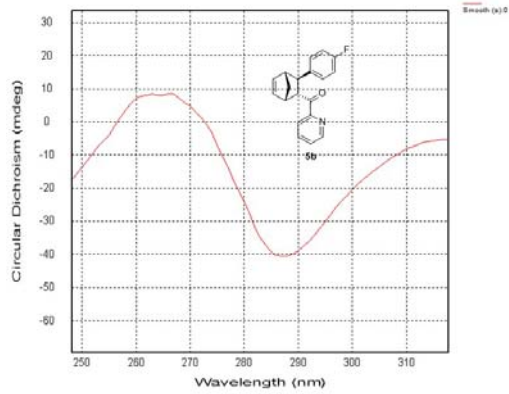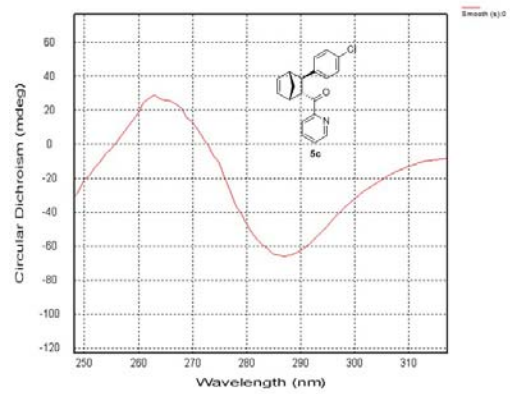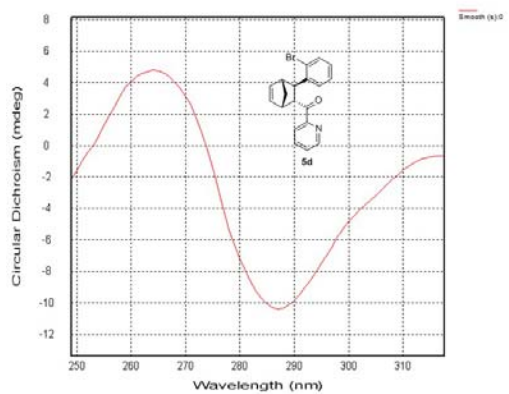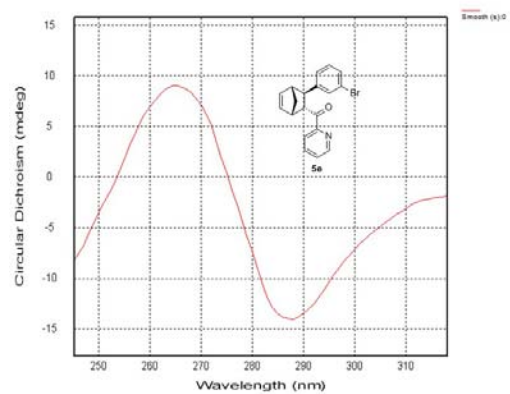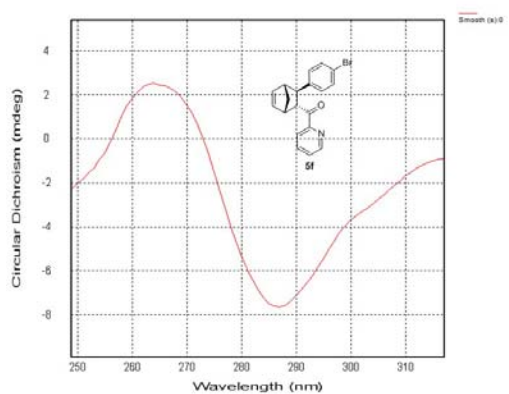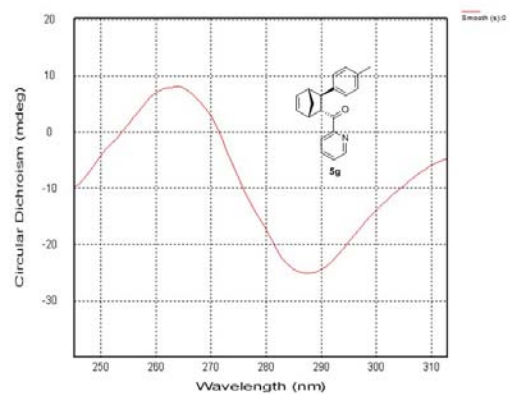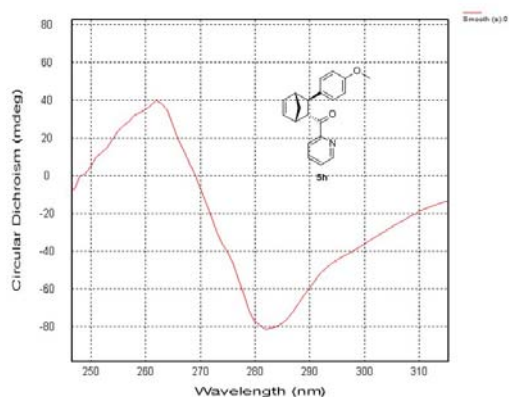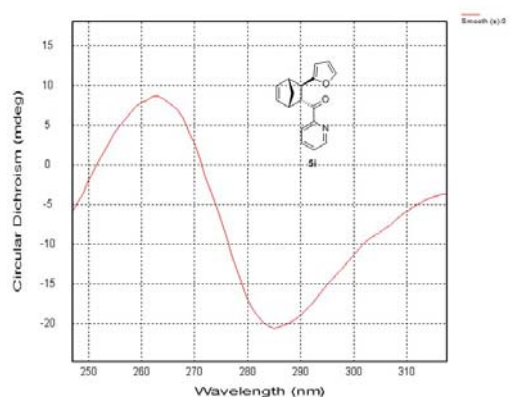

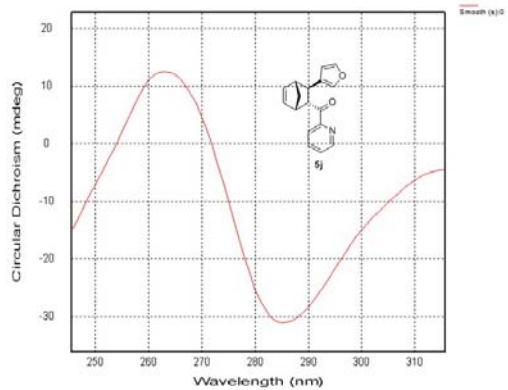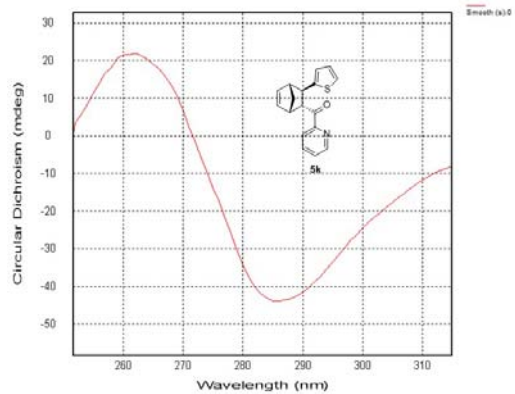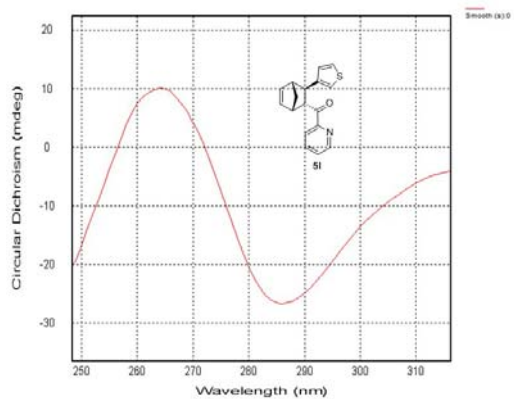

# 10. Copies of <sup>1</sup>H NMR and <sup>13</sup>C NMR Spectra for Products

3a

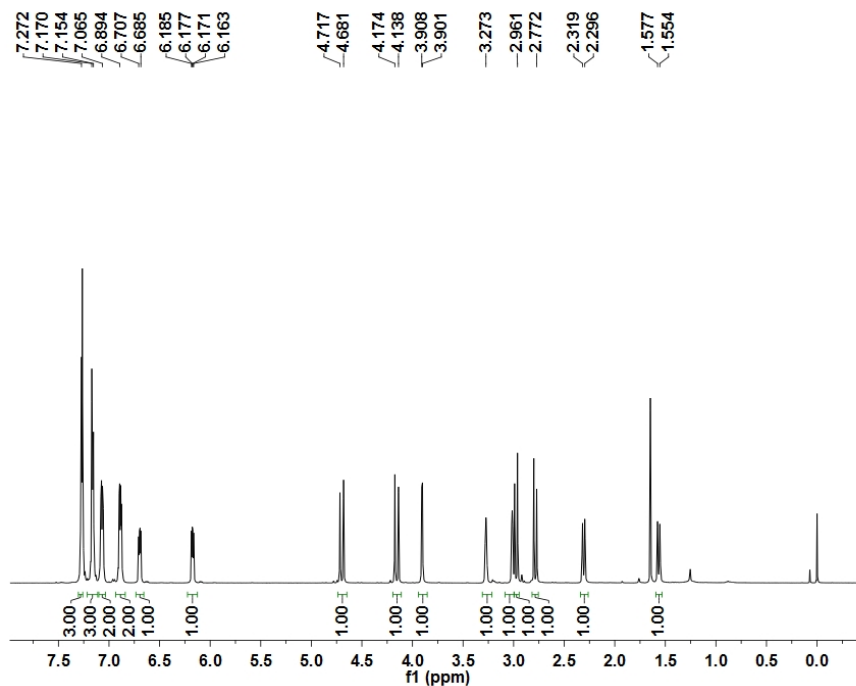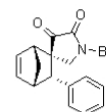

Current Data Parameters

F2 - Acquisition Parameters  
 DATE: 2015-12-07T11:53:58  
 PULPROG: zg30  
 TD: 32768  
 Solvent: CDCl3  
 NS: 32  
 DS: undefined  
 SWH: 8223.7 Hz  
 AQ: undefined  
 TE: 0 C

===== CHANNEL f1 =====  
 NUC1: 1H  
 P1: 9.93 usec  
 SF01: undefined MHz

F2 - Processing Parameters  
 SI: 65536  
 DC: 0.05  
 LB: 0.30 Hz  
 First Point: 0.50  
 FT: Hyper Quadrature  
 Phase: Manual  
 Ph0: 95.74  
 Ph1: 13.41

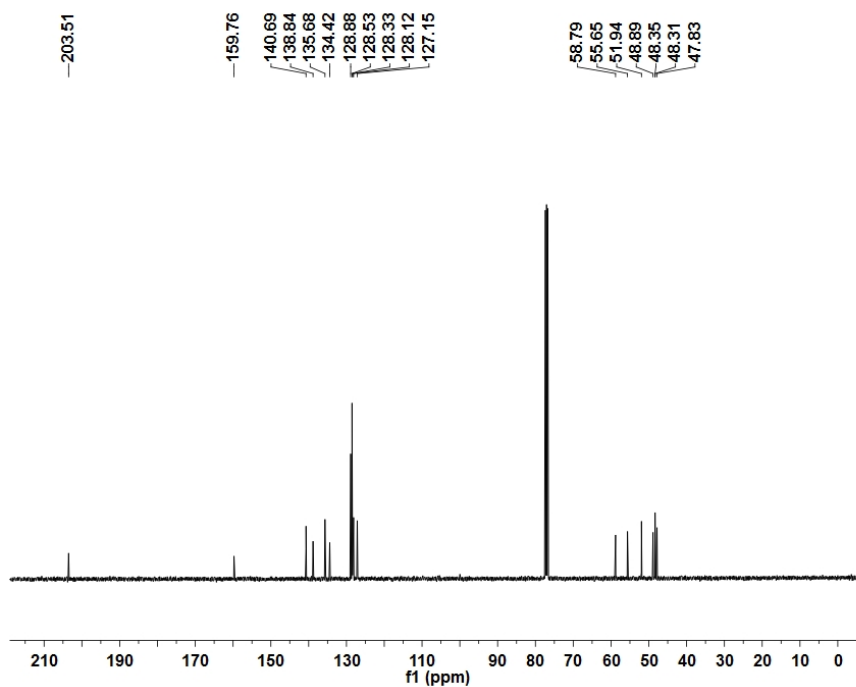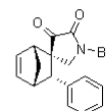

Current Data Parameters

F2 - Acquisition Parameters  
 DATE: 2015-12-07T12:24:09  
 PULPROG: zgpg30  
 TD: 32768  
 Solvent: CDCl3  
 NS: 512  
 DS: undefined  
 SWH: 24038.5 Hz  
 AQ: undefined  
 TE: 0 C

===== CHANNEL f1 =====  
 NUC1: 13C  
 P1: 9.63 usec  
 SF01: undefined MHz

F2 - Processing Parameters  
 SI: 65536  
 DC: 0.05  
 LB: 1.00 Hz  
 First Point: 0.50  
 FT: Hyper Quadrature  
 Phase: Manual  
 Ph0: -71.17  
 Ph1: 72.67

3b

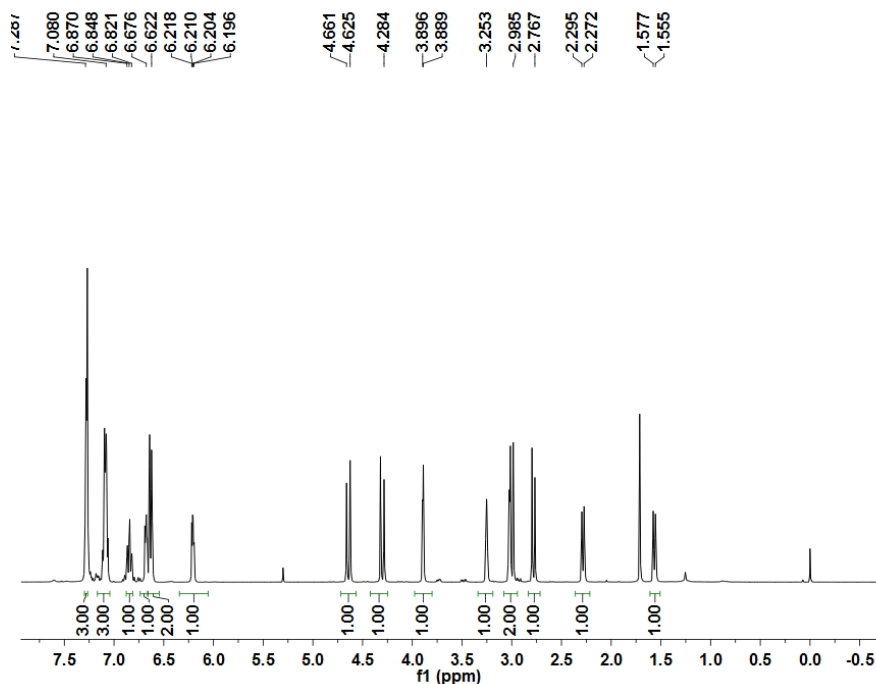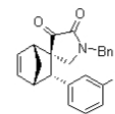

Current Data Parameters

F2 - Acquisition Parameters  
 DATE: 2015-11-18T18:02:23  
 PULPROG: zg30  
 TD: 32768  
 Solvent: CDCl3  
 NS: 32  
 DS: undefined  
 SWH: 8223.7 Hz  
 AQ: undefined  
 TE: 0 C

===== CHANNEL f1 =====  
 NUC1: 1H  
 P1: 9.93 usec  
 SFO1: undefined MHz

F2 - Processing Parameters  
 SI: 65536  
 DC: 0.05  
 LB: 0.30 Hz  
 First Point: 0.50  
 FT: Hyper Quadrature  
 Phase: Manual  
 Ph0: 95.65  
 Ph1: 16.11

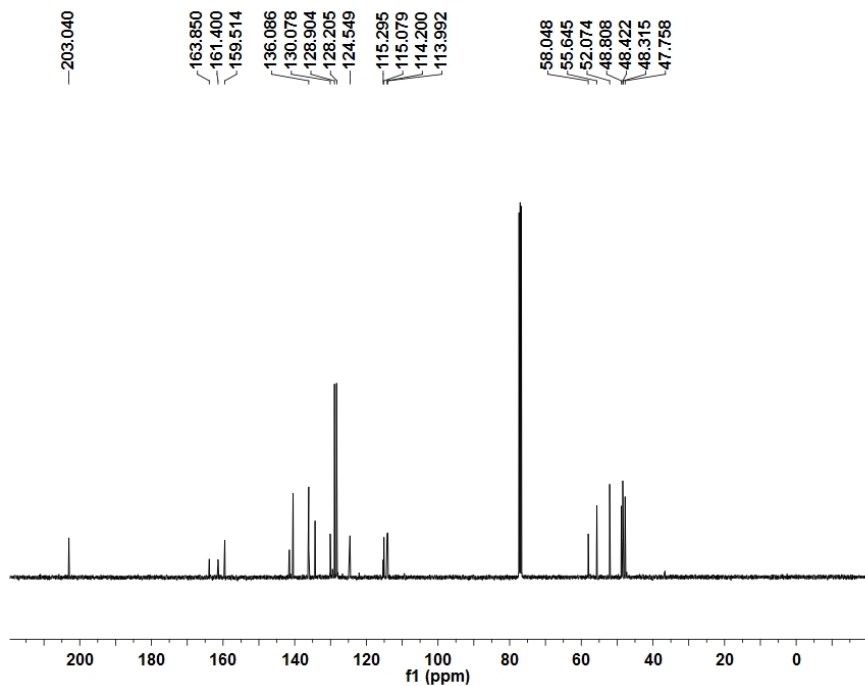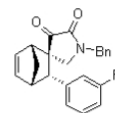

Current Data Parameters

F2 - Acquisition Parameters  
 DATE: 2015-11-18T18:32:37  
 PULPROG: zgpg30  
 TD: 32768  
 Solvent: CDCl3  
 NS: 512  
 DS: undefined  
 SWH: 24038.5 Hz  
 AQ: undefined  
 TE: 0 C

===== CHANNEL f1 =====  
 NUC1: 13C  
 P1: 9.63 usec  
 SFO1: undefined MHz

F2 - Processing Parameters  
 SI: 65536  
 DC: 0.05  
 LB: 1.00 Hz  
 First Point: 0.50  
 FT: Hyper Quadrature  
 Phase: Manual  
 Ph0: -52.96  
 Ph1: 52.30

3c

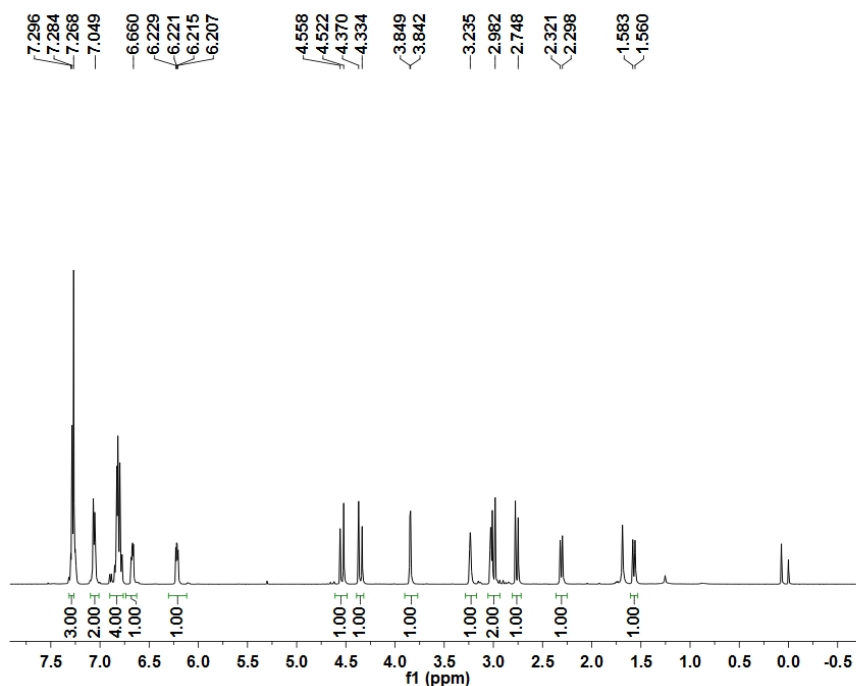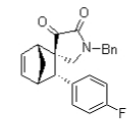

Current Data Parameters

F2 - Acquisition Parameters  
 DATE: 2015-11-18T20:24:26  
 PULPROG: zg30  
 TD: 32768  
 Solvent: CDCl3  
 NS: 32  
 DS: undefined  
 SWH: 8223.7 Hz  
 AQ: undefined  
 TE: 0 C

===== CHANNEL f1 =====  
 NUC1: 1H  
 P1: 9.93 usec  
 SFO1: undefined MHz

F2 - Processing Parameters  
 SI: 65536  
 DC: 0.05  
 LB: 0.30 Hz  
 First Point: 0.50  
 FT: Hyper Quadrature  
 Phase: Manual  
 Ph0: -263.23  
 Ph1: 14.47

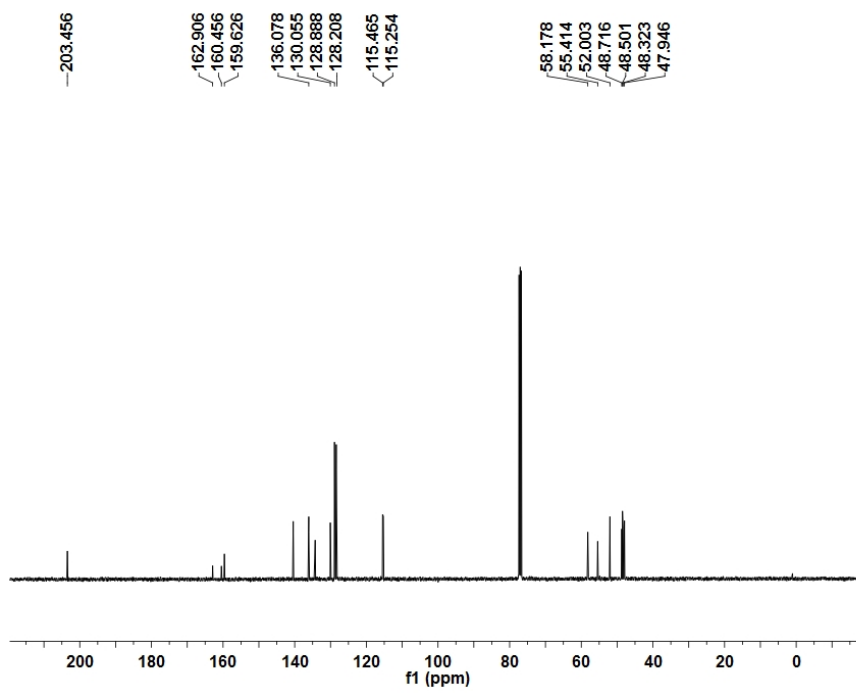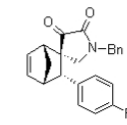

Current Data Parameters

F2 - Acquisition Parameters  
 DATE: 2015-11-18T20:54:38  
 PULPROG: zgpg30  
 TD: 32768  
 Solvent: CDCl3  
 NS: 512  
 DS: undefined  
 SWH: 24038.5 Hz  
 AQ: undefined  
 TE: 0 C

===== CHANNEL f1 =====  
 NUC1: 13C  
 P1: 9.63 usec  
 SFO1: undefined MHz

F2 - Processing Parameters  
 SI: 65536  
 DC: 0.05  
 LB: 1.00 Hz  
 First Point: 0.50  
 FT: Hyper Quadrature  
 Phase: Manual  
 Ph0: -63.48  
 Ph1: 64.77

3d

7.123  
7.087  
7.070  
6.922  
6.709  
6.671  
6.226  
6.218  
6.212  
6.204

4.651  
4.615  
4.303  
3.866  
3.859  
3.251  
2.989  
2.762  
2.293  
2.271  
1.580  
1.557

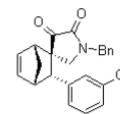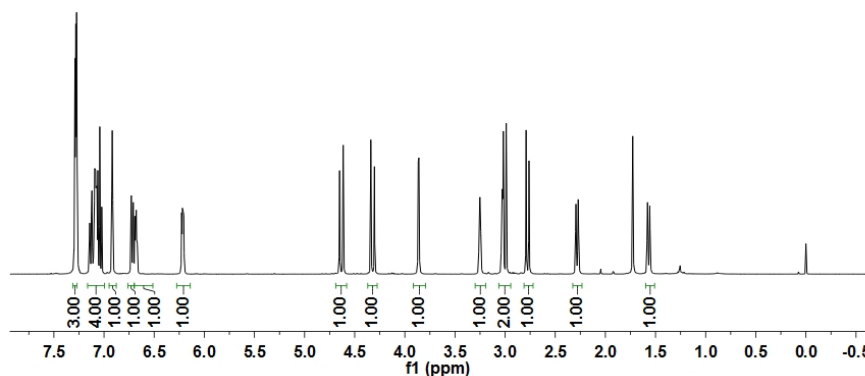

Current Data Parameters

F2 - Acquisition Parameters  
DATE: 2015-11-18T18:38:14  
PULPROG: zg30  
TD: 32768  
Solvent: CDCl3  
NS: 32  
DS: undefined  
SWH: 8223.7 Hz  
AQ: undefined  
TE: 0 C

===== CHANNEL f1 =====  
NUC1: 1H  
P1: 9.93 usec  
SFO1: undefined MHz

F2 - Processing Parameters  
SI: 65536  
DC: 0.05  
LB: 0.30 Hz  
First Point: 0.50  
FT: Hyper Quadrature  
Phase: Manual  
Ph0: 95.86  
Ph1: 16.83

203.022  
159.509  
136.168  
134.387  
134.283  
129.757  
128.914  
128.370  
128.293  
128.213  
127.386  
126.968  
58.096  
55.603  
52.083  
48.782  
48.372  
48.311  
47.788

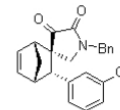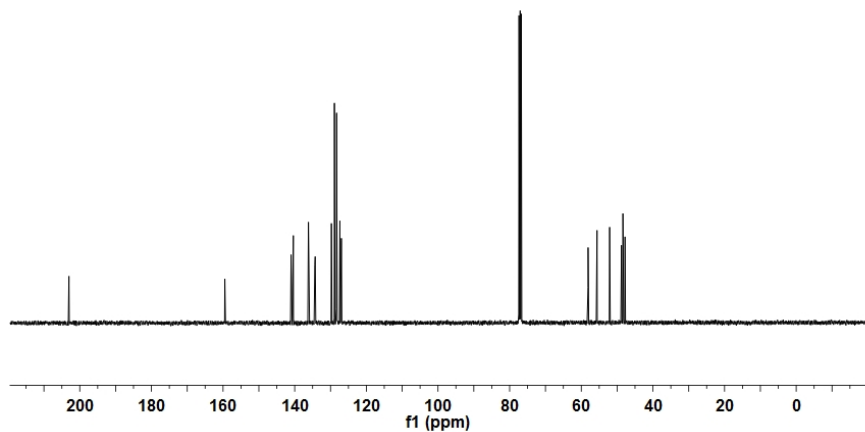

Current Data Parameters

F2 - Acquisition Parameters  
DATE: 2015-11-18T19:08:25  
PULPROG: zgpg30  
TD: 32768  
Solvent: CDCl3  
NS: 512  
DS: undefined  
SWH: 24038.5 Hz  
AQ: undefined  
TE: 0 C

===== CHANNEL f1 =====  
NUC1: 13C  
P1: 9.63 usec  
SFO1: undefined MHz

F2 - Processing Parameters  
SI: 65536  
DC: 0.05  
LB: 1.00 Hz  
First Point: 0.50  
FT: Hyper Quadrature  
Phase: Manual  
Ph0: -61.97  
Ph1: 70.58

3e

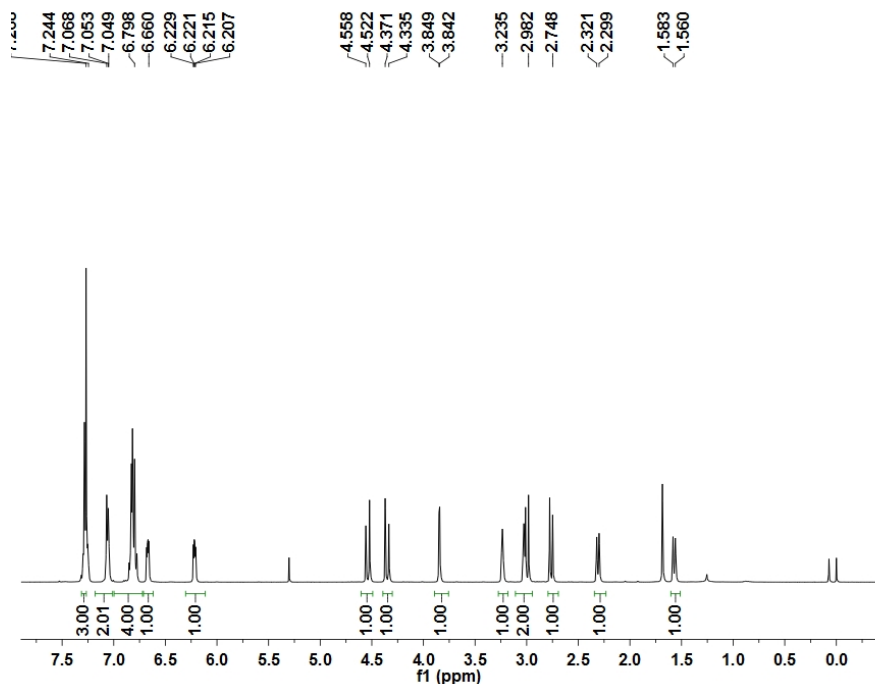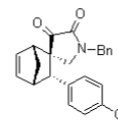

Current Data Parameters

F2 - Acquisition Parameters  
 DATE: 2015-11-18T21:00:15  
 PULPROG: zg30  
 TD: 32768  
 Solvent: CDCl3  
 NS: 32  
 DS: undefined  
 SWH: 8223.7 Hz  
 AQ: undefined  
 TE: 0 C

===== CHANNEL f1 =====  
 NUC1: 1H  
 P1: 9.93 usec  
 SFO1: undefined MHz

F2 - Processing Parameters  
 SI: 65536  
 DC: 0.05  
 LB: 0.30 Hz  
 First Point: 0.50  
 FT: Hyper Quadrature  
 Phase: Manual  
 Ph0: 95.81  
 Ph1: 17.41

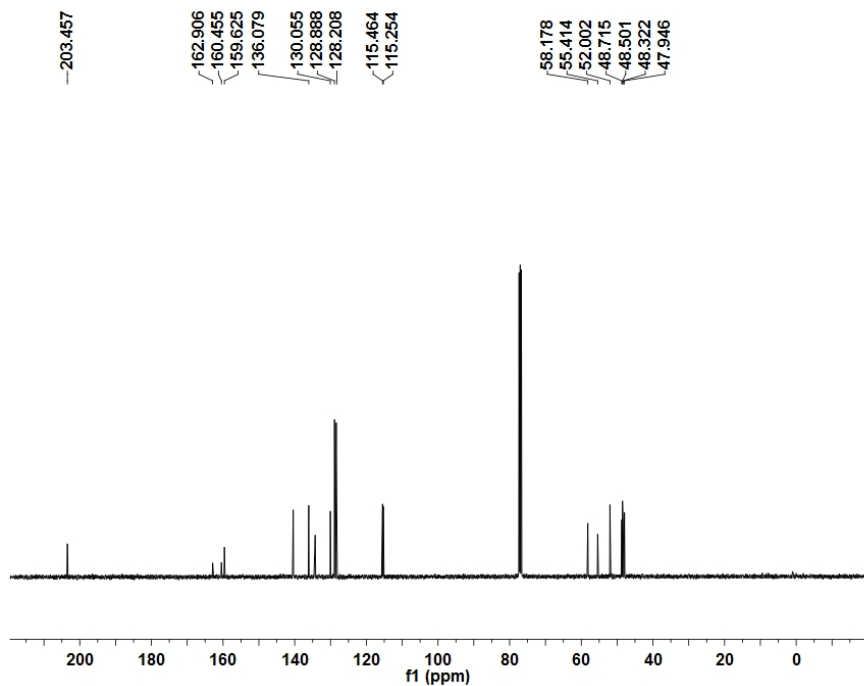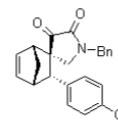

Current Data Parameters

F2 - Acquisition Parameters  
 DATE: 2015-11-18T21:30:27  
 PULPROG: zgpg30  
 TD: 32768  
 Solvent: CDCl3  
 NS: 512  
 DS: undefined  
 SWH: 24038.5 Hz  
 AQ: undefined  
 TE: 0 C

===== CHANNEL f1 =====  
 NUC1: 13C  
 P1: 9.63 usec  
 SFO1: undefined MHz

F2 - Processing Parameters  
 SI: 65536  
 DC: 0.05  
 LB: 1.00 Hz  
 First Point: 0.50  
 FT: Hyper Quadrature  
 Phase: Manual  
 Ph0: -57.03  
 Ph1: 52.29

3f

7.085  
7.080  
7.000  
6.980  
6.961  
6.666  
6.226  
6.218  
6.212  
6.204  
4.655  
4.619  
4.303  
3.856  
3.849  
3.249  
2.988  
2.792  
2.764  
2.290  
2.268  
1.578  
1.555

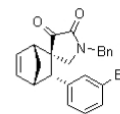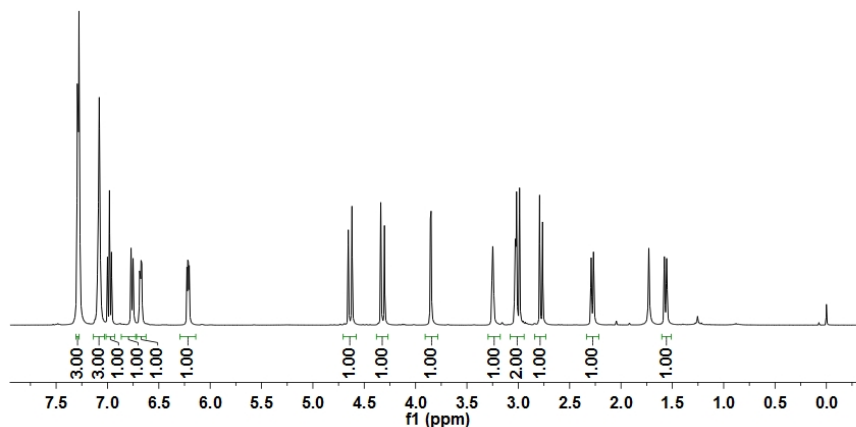

Current Data Parameters

F2 - Acquisition Parameters  
DATE: 2015-11-18T19:14:04  
PULPROG: zg30  
TD: 32768  
Solvent: CDCl3  
NS: 32  
DS: undefined  
SWH: 8223.7 Hz  
AQ: undefined  
TE: 0 C

===== CHANNEL f1 =====  
NUC1: 1H  
P1: 9.93 usec  
SFO1: undefined MHz

F2 - Processing Parameters  
SI: 65536  
DC: 0.05  
LB: 0.30 Hz  
First Point: 0.50  
FT: Hyper Quadrature  
Phase: Manual  
Ph0: -263.96  
Ph1: 16.43

203.006  
159.505  
136.192  
134.277  
131.300  
130.330  
130.030  
128.929  
128.297  
128.220  
127.393  
122.669  
58.067  
55.620  
52.081  
48.771  
48.372  
48.315  
47.789

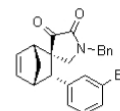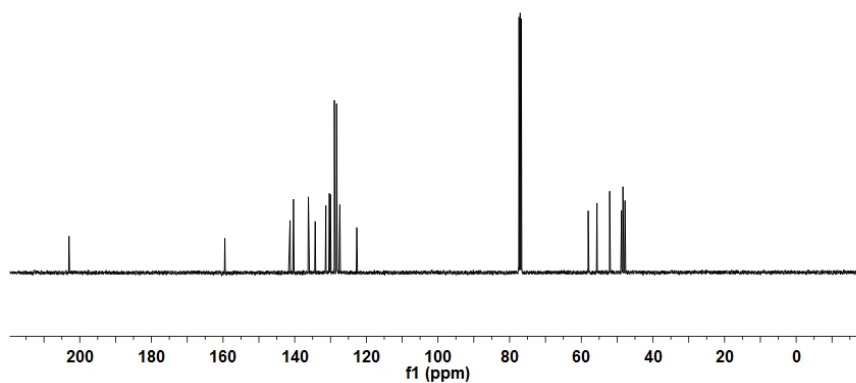

Current Data Parameters

F2 - Acquisition Parameters  
DATE: 2015-11-18T19:44:16  
PULPROG: zgpg30  
TD: 32768  
Solvent: CDCl3  
NS: 512  
DS: undefined  
SWH: 24038.5 Hz  
AQ: undefined  
TE: 0 C

===== CHANNEL f1 =====  
NUC1: 13C  
P1: 9.63 usec  
SFO1: undefined MHz

F2 - Processing Parameters  
SI: 65536  
DC: 0.05  
LB: 1.00 Hz  
First Point: 0.50  
FT: Hyper Quadrature  
Phase: Manual  
Ph0: -60.93  
Ph1: 67.62



3g

7.306  
7.282  
7.261  
7.222  
7.068  
7.048  
6.645  
6.228  
6.214  
6.206  
4.518  
4.482  
4.448  
4.412  
3.818  
3.811  
3.232  
2.984  
2.746  
2.321  
2.298  
1.582  
1.560

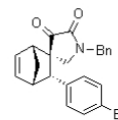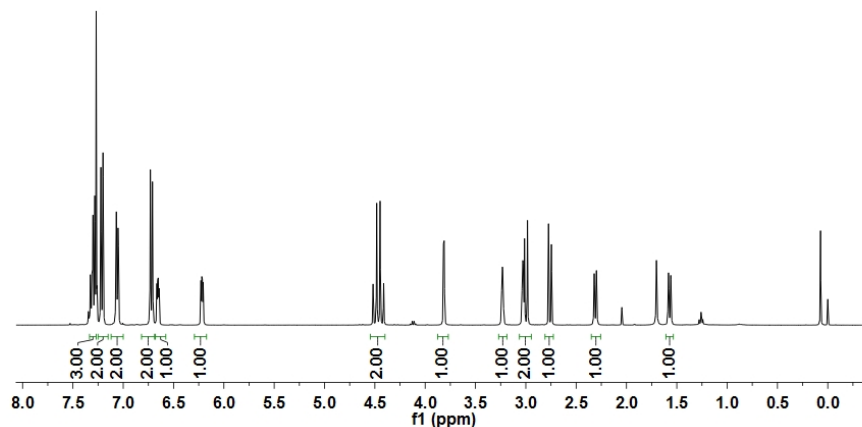

Current Data Parameters

F2 - Acquisition Parameters  
DATE: 2015-11-18T21:36:03  
PULPROG: zg30  
TD: 32768  
Solvent: CDCl3  
NS: 32  
DS: undefined  
SWH: 8223.7 Hz  
AQ: undefined  
TE: 0 C

===== CHANNEL f1 =====  
NUC1: 1H  
P1: 9.93 usec  
SFO1: undefined MHz

F2 - Processing Parameters  
SI: 65536  
DC: 0.05  
LB: 0.30 Hz  
First Point: 0.50  
FT: Hyper Quadrature  
Phase: Manual  
Ph0: 93.93  
Ph1: 19.54

-203.306  
-159.527  
136.158  
131.582  
128.945  
128.274  
121.109  
58.358  
55.276  
52.110  
48.684  
48.326  
47.889

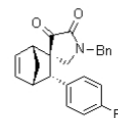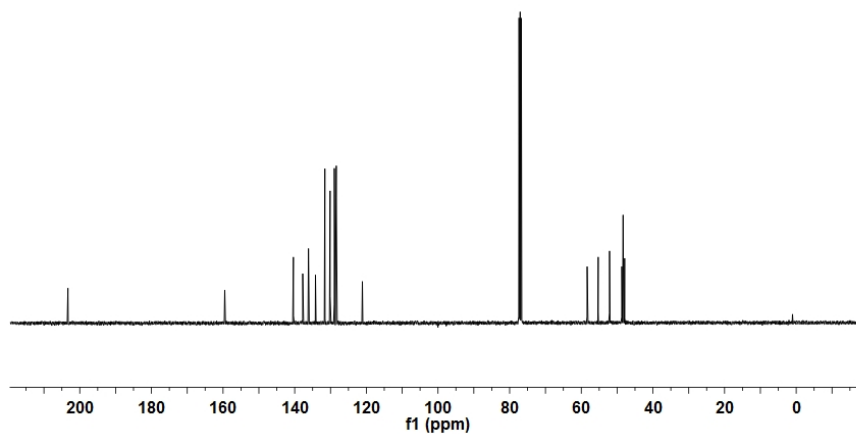

Current Data Parameters

F2 - Acquisition Parameters  
DATE: 2015-11-18T22:06:15  
PULPROG: zgpg30  
TD: 32768  
Solvent: CDCl3  
NS: 512  
DS: undefined  
SWH: 24038.5 Hz  
AQ: undefined  
TE: 0 C

===== CHANNEL f1 =====  
NUC1: 13C  
P1: 9.63 usec  
SFO1: undefined MHz

F2 - Processing Parameters  
SI: 65536  
DC: 0.05  
LB: 1.00 Hz  
First Point: 0.50  
FT: Hyper Quadrature  
Phase: Manual  
Ph0: -58.55  
Ph1: 61.33

3i

7.333  
7.275  
7.257  
7.090  
7.071  
6.944  
6.673  
6.252  
6.244  
6.238  
6.230

4.480  
3.941  
3.935  
3.288  
3.012  
2.724  
2.339  
2.317  
1.609  
1.586

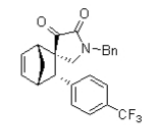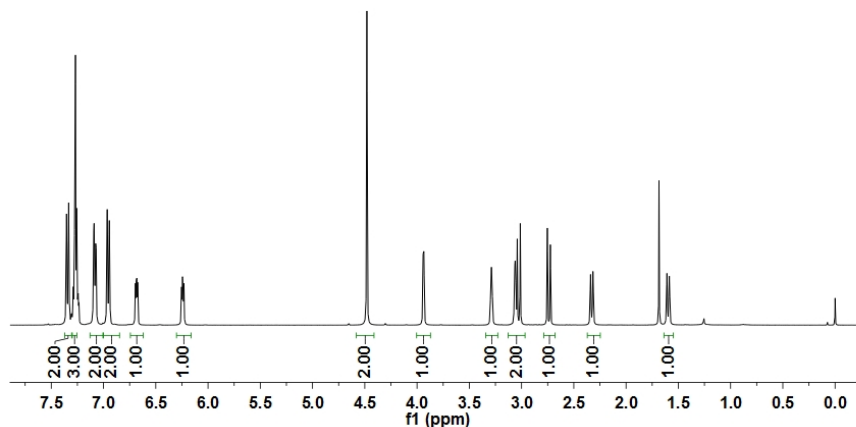

Current Data Parameters

F2 - Acquisition Parameters  
DATE: 2015-11-19T18:33:15  
PULPROG: zg30  
TD: 32768  
Solvent: CDCl3  
NS: 32  
DS: undefined  
SWH: 8223.7 Hz  
AQ: undefined  
TE: 0 C

===== CHANNEL f1 =====  
NUC1: 1H  
P1: 9.93 usec  
SFO1: undefined MHz

F2 - Processing Parameters  
SI: 65536  
DC: 0.05  
LB: 0.30 Hz  
First Point: 0.50  
FT: Hyper Quadrature  
Phase: Manual  
Phi0: 96.35  
Phi1: 16.12

202.947  
159.364  
136.266  
134.265  
129.440  
129.117  
128.914  
128.773  
128.410  
128.386  
125.418  
125.381  
125.251  
122.548  
58.294  
55.245  
52.255  
48.725  
48.350  
48.234  
47.670

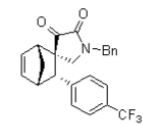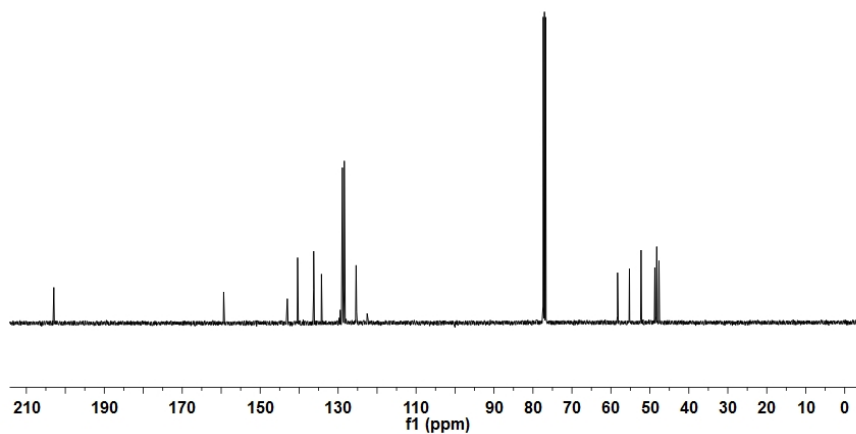

Current Data Parameters

F2 - Acquisition Parameters  
DATE: 2015-11-19T19:03:27  
PULPROG: zgpg30  
TD: 32768  
Solvent: CDCl3  
NS: 512  
DS: undefined  
SWH: 24038.5 Hz  
AQ: undefined  
TE: 0 C

===== CHANNEL f1 =====  
NUC1: 13C  
P1: 9.63 usec  
SFO1: undefined MHz

F2 - Processing Parameters  
SI: 65536  
DC: 0.05  
LB: 1.00 Hz  
First Point: 0.50  
FT: Hyper Quadrature  
Phase: Manual  
Phi0: -65.75  
Phi1: 69.77

3i

7.291  
7.255  
7.112  
7.091  
7.051  
6.997  
-6.619  
-6.272  
-6.264  
-6.258  
-6.250  
4.555  
4.519  
4.462  
4.426  
3.795  
3.788  
3.049  
3.041  
3.012  
-2.749  
-2.309  
-2.286  
-1.591  
-1.569

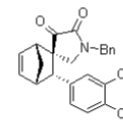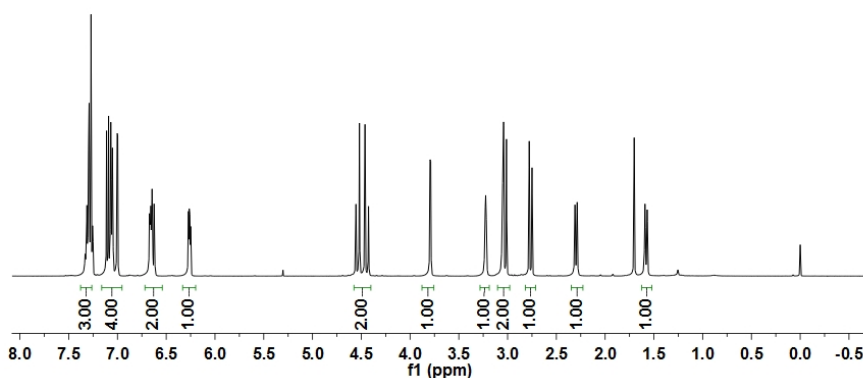

Current Data Parameters

F2 - Acquisition Parameters  
DATE: 2015-11-20T00:31:18  
PULPROG: zg30  
TD: 32768  
Solvent: CDCl3  
NS: 32  
DS: undefined  
SWH: 8223.7 Hz  
AQ: undefined  
TE: 0 C

===== CHANNEL f1 =====  
NUC1: 1H  
P1: 9.93 usec  
SFO1: undefined MHz

F2 - Processing Parameters  
SI: 65536  
DC: 0.05  
LB: 0.30 Hz  
First Point: 0.50  
FT: Hyper Quadrature  
Phase: Manual  
Ph0: 96.15  
Ph1: 16.16

-202.979  
-159.340  
136.570  
134.083  
132.551  
131.287  
130.357  
130.168  
128.915  
128.351  
128.305  
128.050  
57.845  
55.353  
52.182  
48.555  
48.469  
48.307  
47.941

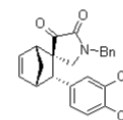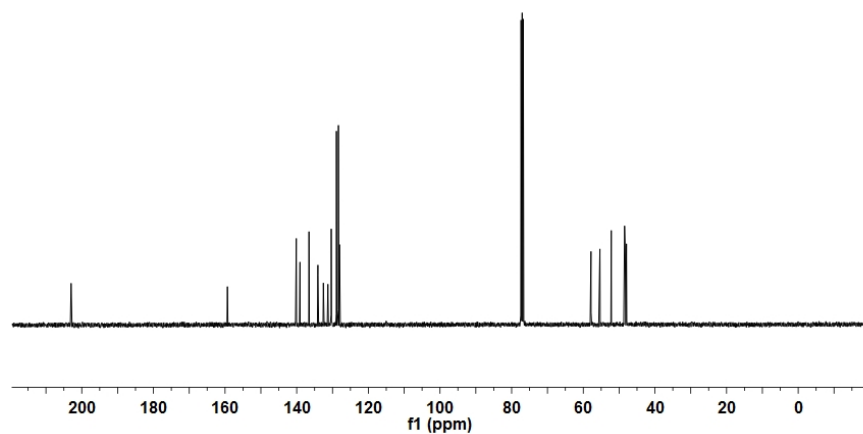

Current Data Parameters

F2 - Acquisition Parameters  
DATE: 2015-11-20T01:01:30  
PULPROG: zgpg30  
TD: 32768  
Solvent: CDCl3  
NS: 512  
DS: undefined  
SWH: 24038.5 Hz  
AQ: undefined  
TE: 0 C

===== CHANNEL f1 =====  
NUC1: 13C  
P1: 9.63 usec  
SFO1: undefined MHz

F2 - Processing Parameters  
SI: 65536  
DC: 0.05  
LB: 1.00 Hz  
First Point: 0.50  
FT: Hyper Quadrature  
Phase: Manual  
Ph0: -51.10  
Ph1: 39.03

3j

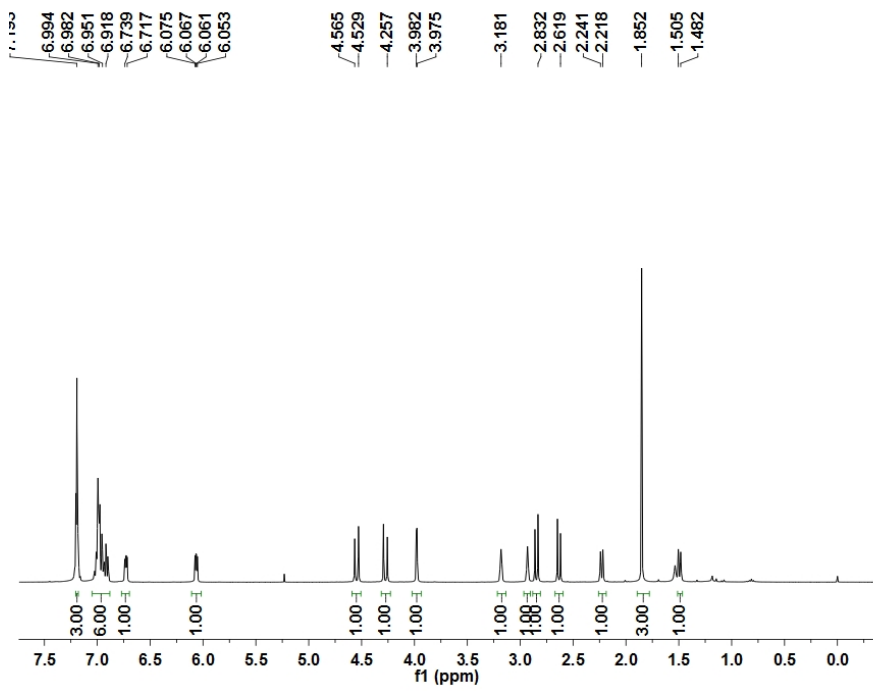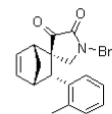

Current Data Parameters

F2 - Acquisition Parameters  
 DATE: 2016-01-23T01:51:27  
 PULPROG: zg30  
 TD: 32768  
 Solvent: CDCl3  
 NS: 64  
 DS: undefined  
 SWH: 8223.7 Hz  
 AQ: undefined  
 TE: 0 C

===== CHANNEL f1 =====  
 NUC1: 1H  
 P1: 9.93 usec  
 SFO1: undefined MHz

F2 - Processing Parameters  
 SI: 65536  
 DC: 0.05  
 LB: 0.30 Hz  
 First Point: 0.50  
 FT: Hyper Quadrature  
 Phase: Manual  
 Ph0: 97.73  
 Ph1: 11.56

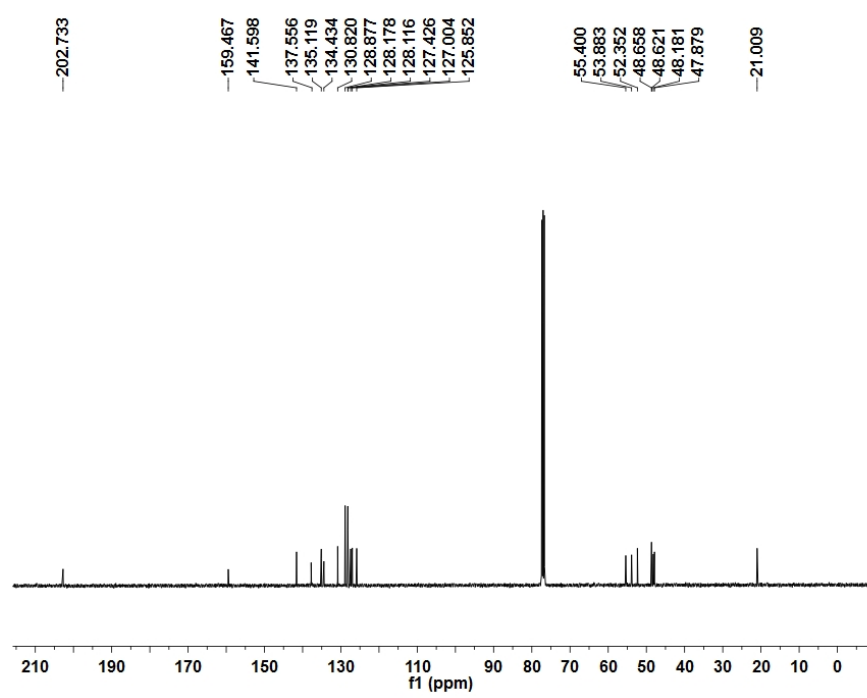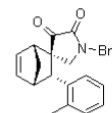

Current Data Parameters

F2 - Acquisition Parameters  
 DATE: 2016-01-23T02:50:53  
 PULPROG: zgpg30  
 TD: 32768  
 Solvent: CDCl3  
 NS: 1024  
 DS: undefined  
 SWH: 24038.5 Hz  
 AQ: undefined  
 TE: 0 C

===== CHANNEL f1 =====  
 NUC1: 13C  
 P1: 9.63 usec  
 SFO1: undefined MHz

F2 - Processing Parameters  
 SI: 65536  
 DC: 0.05  
 LB: 1.00 Hz  
 First Point: 0.50  
 FT: Hyper Quadrature  
 Phase: Manual  
 Ph0: -60.74  
 Ph1: 53.53

3k

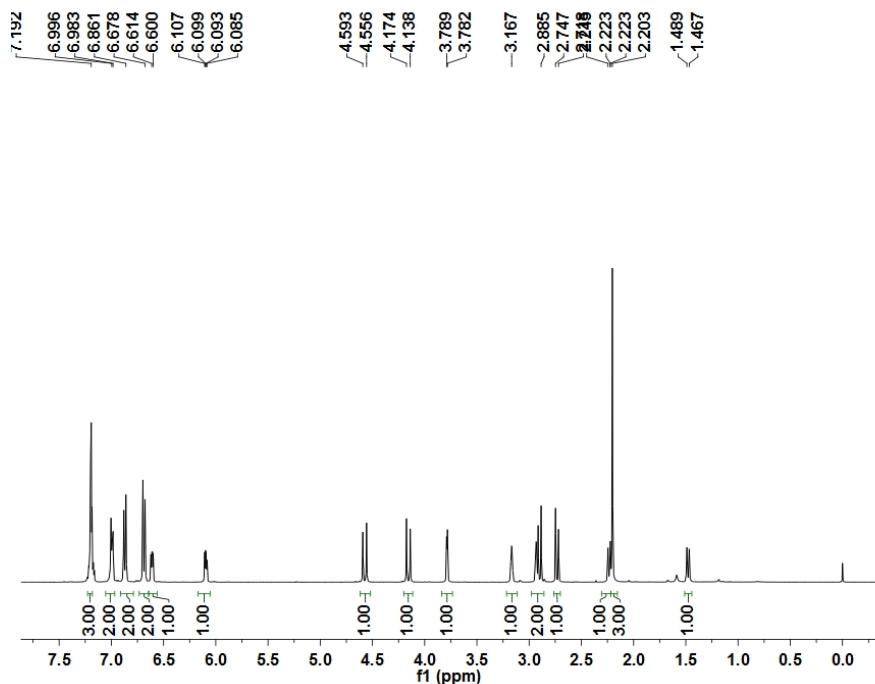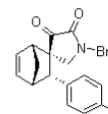

Current Data Parameters

F2 - Acquisition Parameters  
 DATE: 2016-01-23T20:15:15  
 PULPROG: zg30  
 TD: 32768  
 Solvent: CDCl3  
 NS: 64  
 DS: undefined  
 SWH: 8223.7 Hz  
 AQ: undefined  
 TE: 0 C

===== CHANNEL f1 =====  
 NUC1: 1H  
 P1: 9.93 usec  
 SFO1: undefined MHz

F2 - Processing Parameters  
 SI: 65536  
 DC: 0.05  
 LB: 0.30 Hz  
 First Point: 0.50  
 FT: Hyper Quadrature  
 Phase: Manual  
 Ph0: 98.23  
 Ph1: 14.49

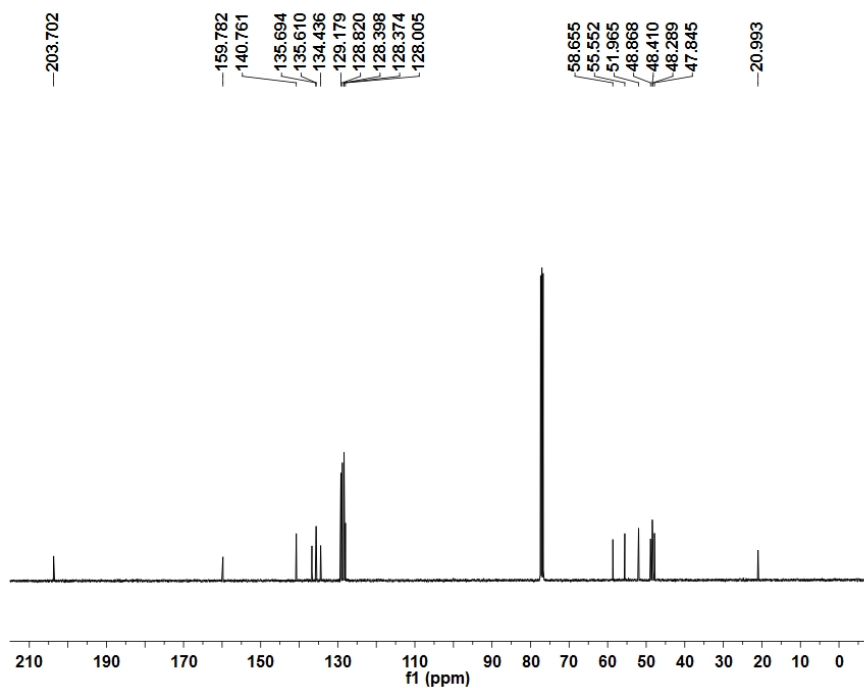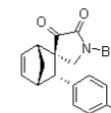

Current Data Parameters

F2 - Acquisition Parameters  
 DATE: 2016-01-23T21:14:41  
 PULPROG: zgpg30  
 TD: 32768  
 Solvent: CDCl3  
 NS: 1024  
 DS: undefined  
 SWH: 24038.5 Hz  
 AQ: undefined  
 TE: 0 C

===== CHANNEL f1 =====  
 NUC1: 13C  
 P1: 9.63 usec  
 SFO1: undefined MHz

F2 - Processing Parameters  
 SI: 65536  
 DC: 0.05  
 LB: 1.00 Hz  
 First Point: 0.50  
 FT: Hyper Quadrature  
 Phase: Manual  
 Ph0: -72.07  
 Ph1: 75.38

31

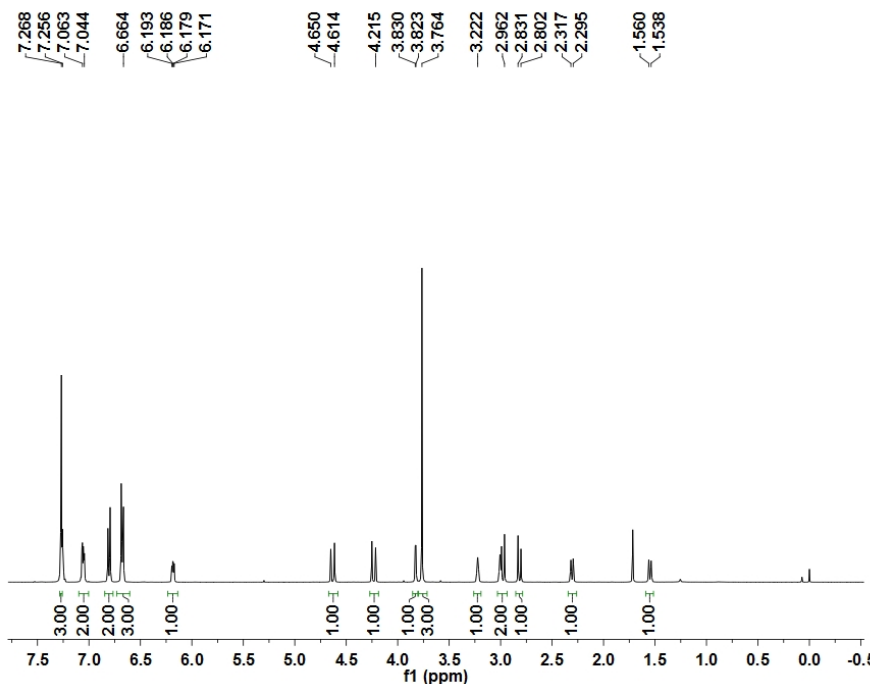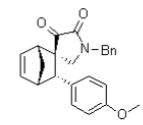

Current Data Parameters

F2 - Acquisition Parameters  
 DATE: 2015-11-19T17:57:26  
 PULPROG: zg30  
 TD: 32768  
 Solvent: CDCl3  
 NS: 16  
 DS: undefined  
 SWH: 8223.7 Hz  
 AQ: undefined  
 TE: 0 C

===== CHANNEL f1 =====  
 NUC1: 1H  
 P1: 9.93 usec  
 SFO1: undefined MHz

F2 - Processing Parameters  
 SI: 65536  
 DC: 0.05  
 LB: 0.30 Hz  
 First Point: 0.50  
 FT: Hyper Quadrature  
 Phase: Manual  
 Ph0: 94.63  
 Ph1: 17.79

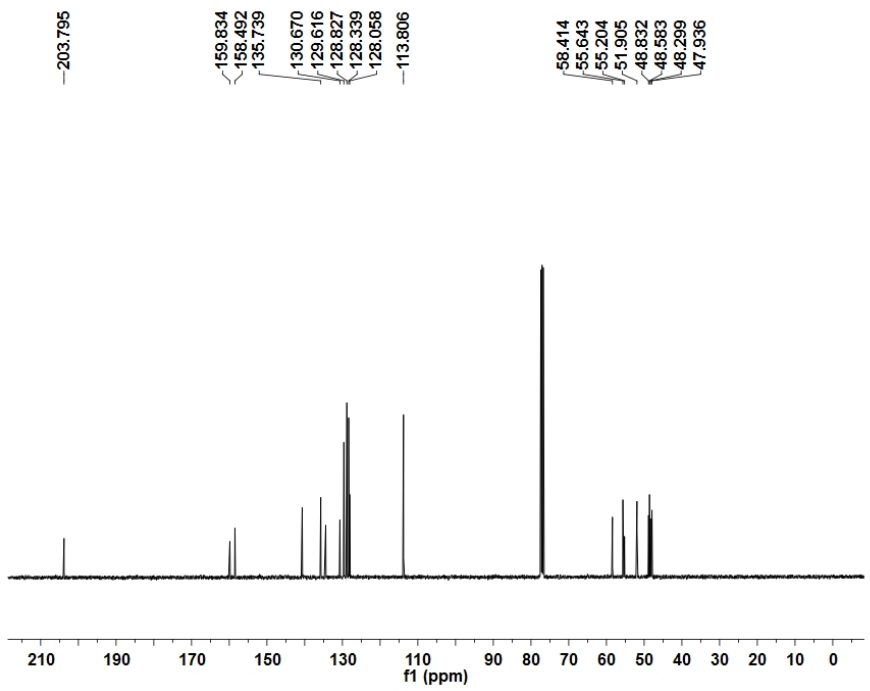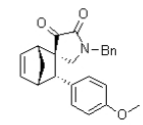

Current Data Parameters

F2 - Acquisition Parameters  
 DATE: 2015-11-19T18:27:38  
 PULPROG: zgpg30  
 TD: 32768  
 Solvent: CDCl3  
 NS: 512  
 DS: undefined  
 SWH: 24038.5 Hz  
 AQ: undefined  
 TE: 0 C

===== CHANNEL f1 =====  
 NUC1: 13C  
 P1: 9.63 usec  
 SFO1: undefined MHz

F2 - Processing Parameters  
 SI: 65536  
 DC: 0.05  
 LB: 1.00 Hz  
 First Point: 0.50  
 FT: Hyper Quadrature  
 Phase: Manual  
 Ph0: -68.92  
 Ph1: 71.95

3m

7.402  
7.386  
7.240  
7.202  
7.165  
7.053  
7.016  
6.960  
6.940  
6.922  
6.872  
6.858  
6.481  
6.081  
6.067  
4.515  
4.515  
4.509  
4.509  
4.136  
3.346  
2.986  
2.652  
2.420  
2.176  
1.620  
1.597

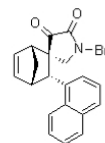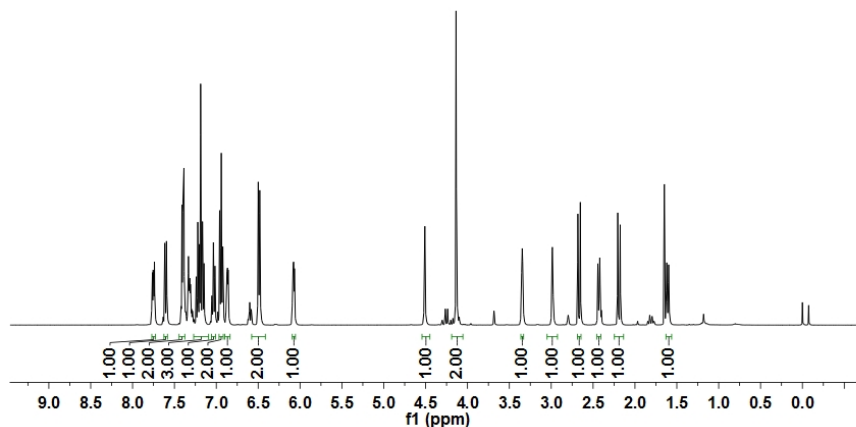

Current Data Parameters

F2 - Acquisition Parameters  
DATE: 2015-11-17T12:55:09  
PULPROG: zg30  
TD: 32768  
Solvent: CDCl3  
NS: 32  
DS: undefined  
SWH: 8223.7 Hz  
AQ: undefined  
TE: 0 C

===== CHANNEL f1 =====  
NUC1: 1H  
P1: 9.93 usec  
SFO1: undefined MHz

F2 - Processing Parameters  
SI: 65536  
DC: 0.05  
LB: 0.30 Hz  
First Point: 0.50  
FT: Hyper Quadrature  
Phase: Manual  
Ph0: 93.31  
Ph1: 21.31

-204.257  
-159.502  
141.484  
128.640  
127.675  
127.606  
126.986  
126.019  
124.992  
124.929  
122.921  
55.036  
54.778  
52.589  
48.480  
48.218  
47.929

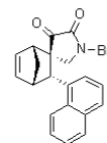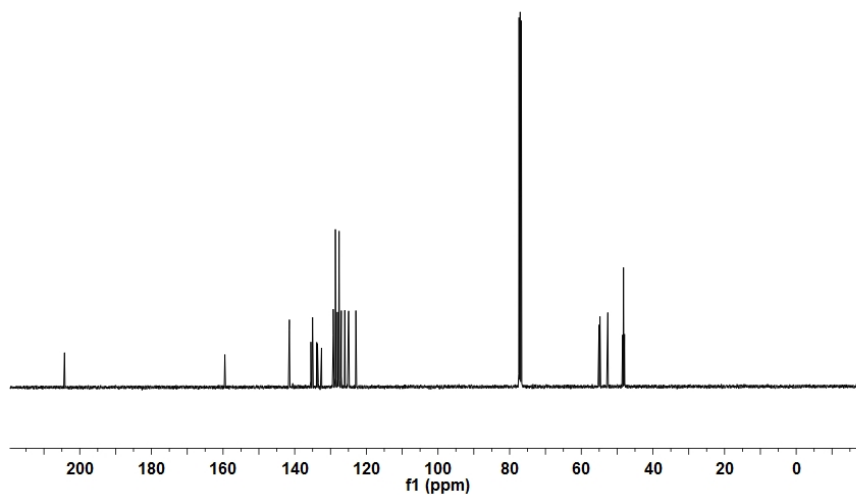

Current Data Parameters

F2 - Acquisition Parameters  
DATE: 2016-01-23T00:14:09  
PULPROG: zgpg30  
TD: 32768  
Solvent: CDCl3  
NS: 1024  
DS: undefined  
SWH: 24038.5 Hz  
AQ: undefined  
TE: 0 C

===== CHANNEL f1 =====  
NUC1: 13C  
P1: 9.63 usec  
SFO1: undefined MHz

F2 - Processing Parameters  
SI: 65536  
DC: 0.05  
LB: 1.00 Hz  
First Point: 0.50  
FT: Hyper Quadrature  
Phase: Manual  
Ph0: -64.14  
Ph1: 58.05

3n

7.742  
7.714  
7.543  
7.473  
7.463  
7.421  
6.928  
6.809  
6.239  
6.231  
6.225  
6.217  
4.583  
4.547  
4.243  
4.071  
4.064  
3.356  
2.985  
2.796  
2.396  
2.373  
1.631  
1.608

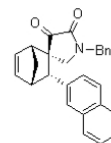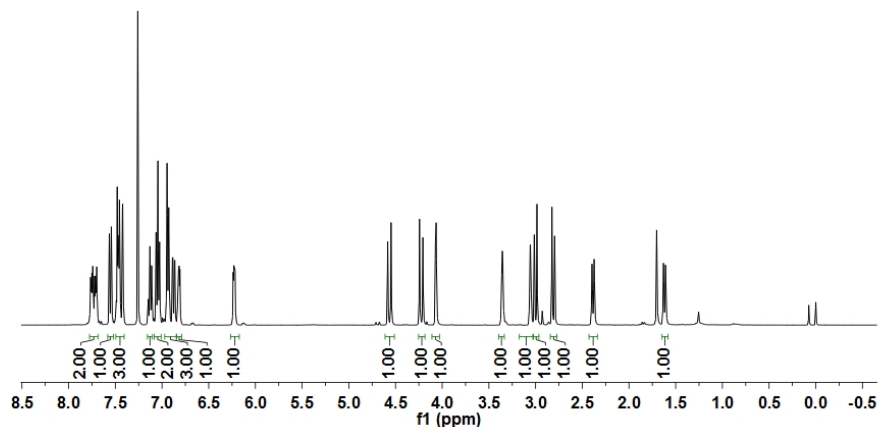

-203.691  
-159.750  
-135.828  
-128.685  
-128.172  
-127.980  
-127.805  
-127.589  
-127.142  
-126.548  
-126.389  
-126.047  
59.397  
55.453  
52.131  
48.865  
48.414  
48.267  
48.058

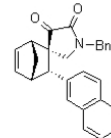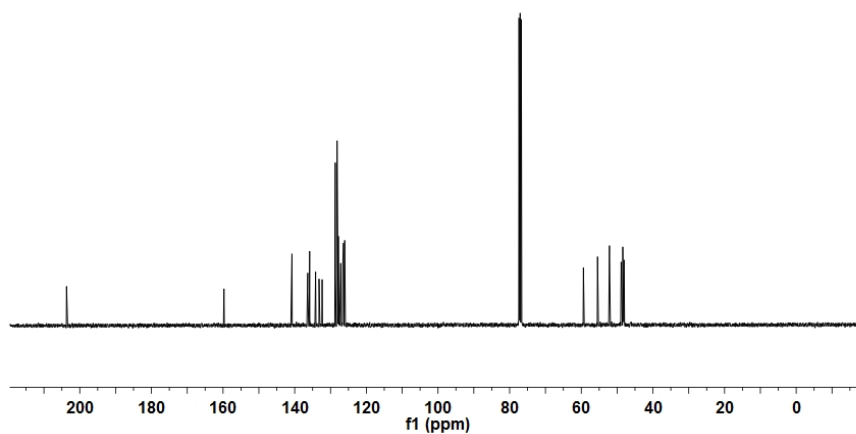



30

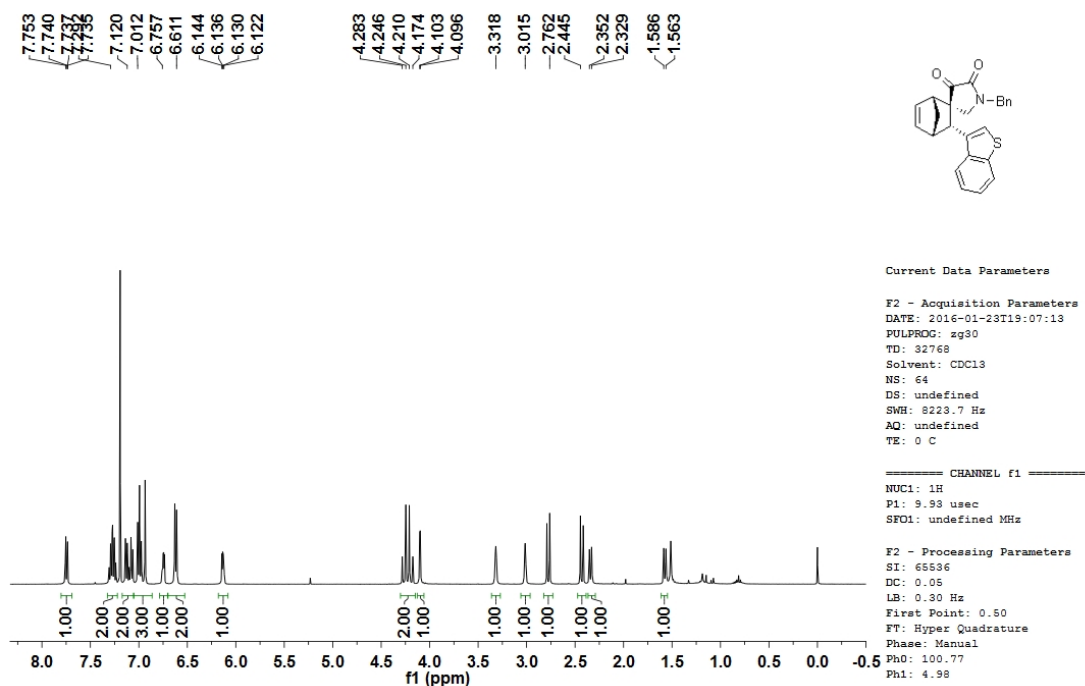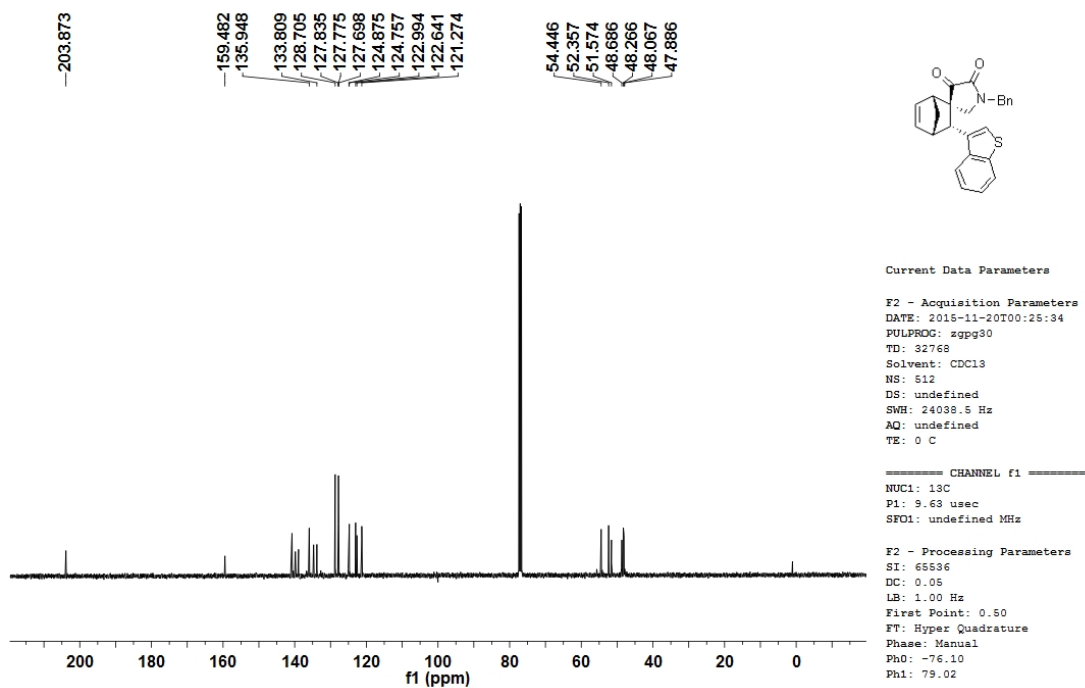

6

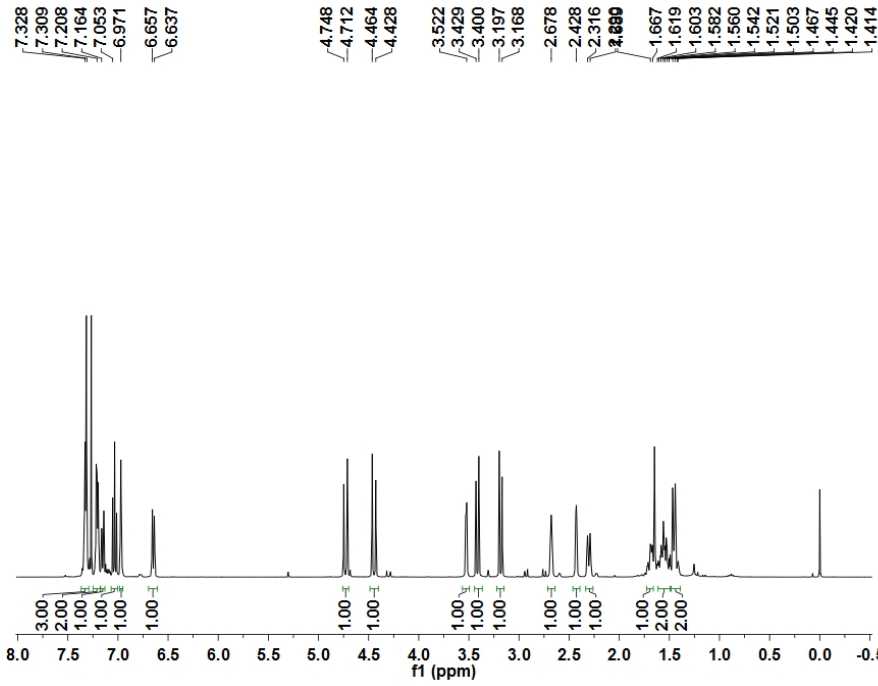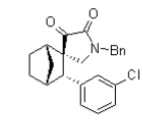

Current Data Parameters

F2 - Acquisition Parameters  
DATE: 2015-12-07T12:29:28  
PULPROG: zg30  
TD: 32768  
Solvent: CDCl3  
NS: 32  
DS: undefined  
SWH: 8223.7 Hz  
AQ: undefined  
TE: 0 C

===== CHANNEL f1 =====  
NUC1: 1H  
P1: 9.93 usec  
SFO1: undefined MHz

F2 - Processing Parameters  
SI: 65536  
DC: 0.05  
LB: 0.30 Hz  
First Point: 0.50  
FT: Hyper Quadrature  
Phase: Manual  
Ph0: 94.38  
Ph1: 17.71

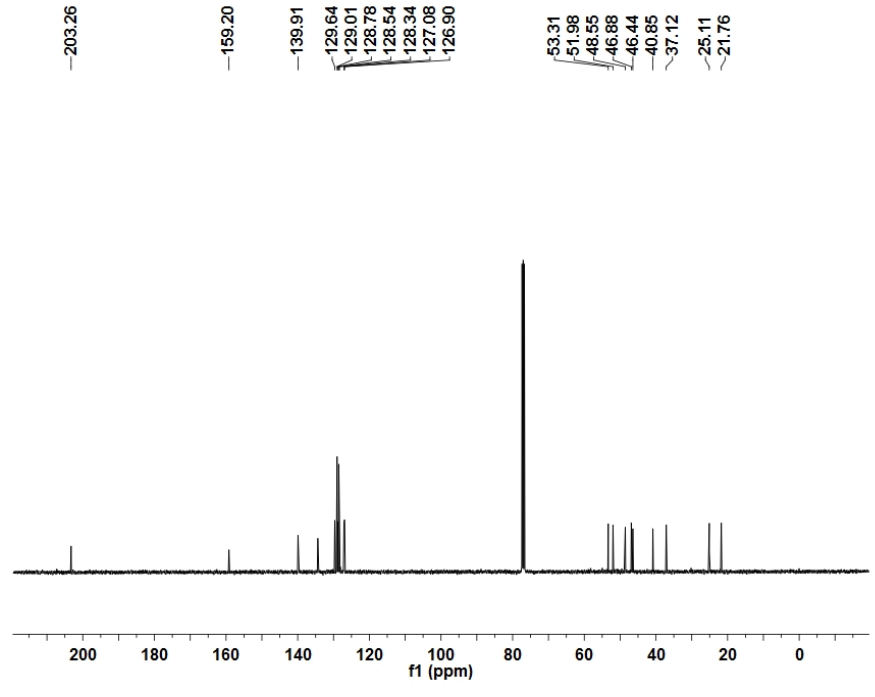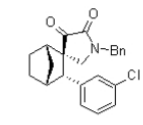

Current Data Parameters

F2 - Acquisition Parameters  
DATE: 2015-12-07T12:59:40  
PULPROG: zgpg30  
TD: 32768  
Solvent: CDCl3  
NS: 512  
DS: undefined  
SWH: 24038.5 Hz  
AQ: undefined  
TE: 0 C

===== CHANNEL f1 =====  
NUC1: 13C  
P1: 9.63 usec  
SFO1: undefined MHz

F2 - Processing Parameters  
SI: 65536  
DC: 0.05  
LB: 1.00 Hz  
First Point: 0.50  
FT: Hyper Quadrature  
Phase: Manual  
Ph0: -64.75  
Ph1: 61.55



5b

8.600  
8.596  
7.943  
7.755  
7.732  
7.373  
7.168  
6.860  
6.397  
5.760  
5.753  
5.746  
5.739  
4.396  
4.387  
4.383  
4.374  
3.467  
3.348  
3.336  
2.971  
2.968  
1.970  
1.949  
1.557  
1.552  
1.535  
1.531

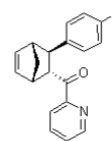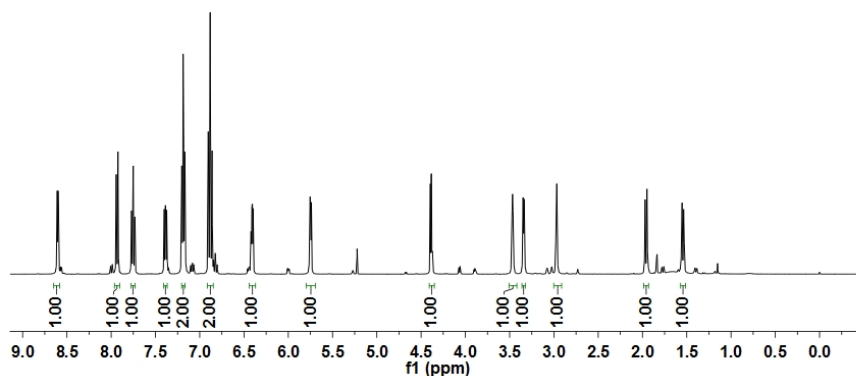

Current Data Parameters

F2 - Acquisition Parameters  
DATE: 2016-02-19T13:17:21  
PULPROG: zg30  
TD: 32768  
Solvent: CDCl3  
NS: 64  
DS: undefined  
SWH: 8223.7 Hz  
AQ: undefined  
TE: 293.8 C

===== CHANNEL f1 =====  
NUC1: 1H  
P1: 9.93 usec  
SFO1: undefined MHz

F2 - Processing Parameters  
SI: 65536  
DC: 0.05  
LB: 0.30 Hz  
First Point: 0.50  
FT: Hyper Quadrature  
Phase: Manual  
Ph0: 95.14  
Ph1: 16.13

201.01  
153.47  
148.89  
139.36  
132.91  
128.91  
122.25  
115.17  
114.96  
54.54  
49.38  
48.74  
48.16  
44.86

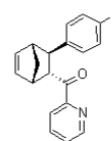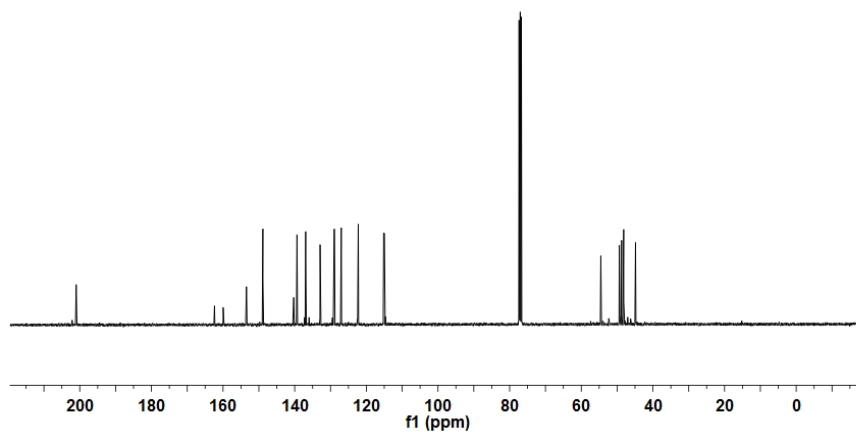

Current Data Parameters

F2 - Acquisition Parameters  
DATE: 2016-02-19T14:16:48  
PULPROG: zgpg30  
TD: 32768  
Solvent: CDCl3  
NS: 1024  
DS: undefined  
SWH: 24038.5 Hz  
AQ: undefined  
TE: 294.1 C

===== CHANNEL f1 =====  
NUC1: 13C  
P1: 9.63 usec  
SFO1: undefined MHz

F2 - Processing Parameters  
SI: 65536  
DC: 0.05  
LB: 1.00 Hz  
First Point: 0.50  
FT: Hyper Quadrature  
Phase: Manual  
Ph0: -65.65  
Ph1: 56.77

5c

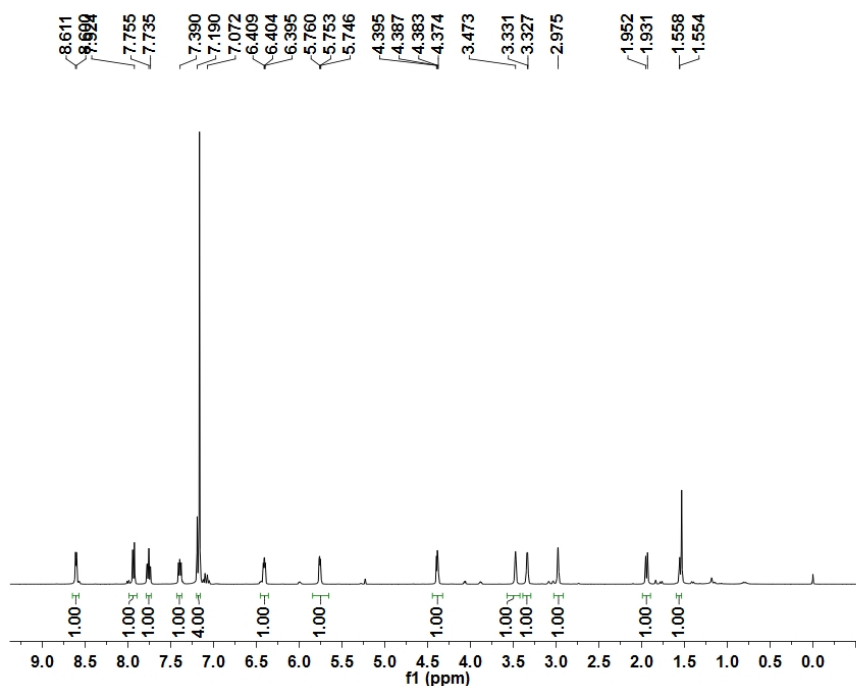

Current Data Parameters

F2 - Acquisition Parameters  
 DATE: 2016-01-14T13:02:59  
 PULPROG: zg30  
 TD: 32768  
 Solvent: CDCl3  
 NS: 64  
 DS: undefined  
 SWH: 8223.7 Hz  
 AQ: undefined  
 TE: 0 C

===== CHANNEL f1 =====  
 NUC1: 1H  
 P1: 9.93 usec  
 SFO1: undefined MHz

F2 - Processing Parameters  
 SI: 65536  
 DC: 0.05  
 LB: 0.30 Hz  
 First Point: 0.50  
 FT: Hyper Quadrature  
 Phase: Manual  
 Ph0: 99.19  
 Ph1: 11.43

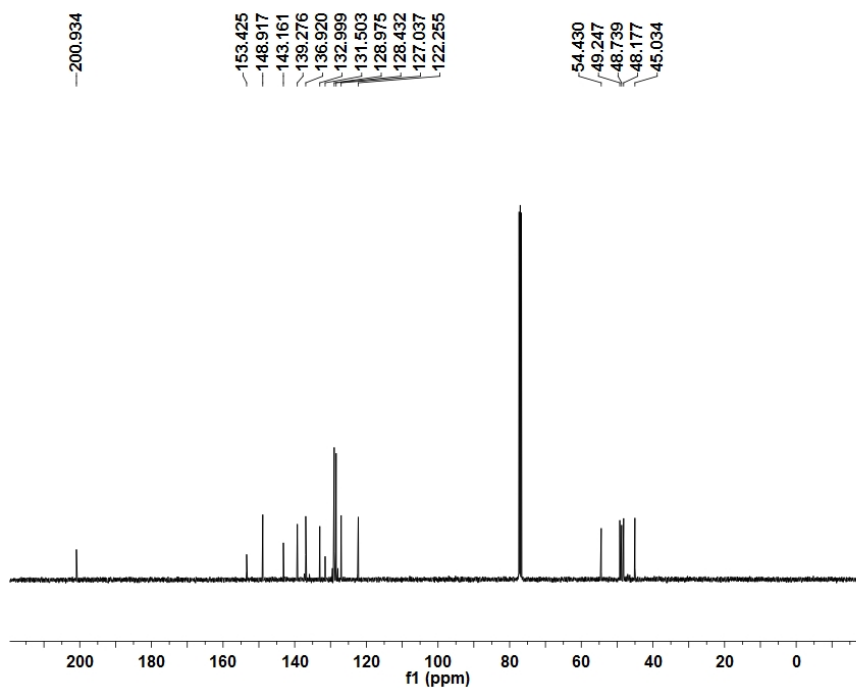

Current Data Parameters

F2 - Acquisition Parameters  
 DATE: 2016-01-14T13:33:11  
 PULPROG: zgpg30  
 TD: 32768  
 Solvent: CDCl3  
 NS: 512  
 DS: undefined  
 SWH: 24038.5 Hz  
 AQ: undefined  
 TE: 0 C

===== CHANNEL f1 =====  
 NUC1: 13C  
 P1: 9.63 usec  
 SFO1: undefined MHz

F2 - Processing Parameters  
 SI: 65536  
 DC: 0.05  
 LB: 1.00 Hz  
 First Point: 0.50  
 FT: Hyper Quadrature  
 Phase: Manual  
 Ph0: -70.99  
 Ph1: 63.55

5d

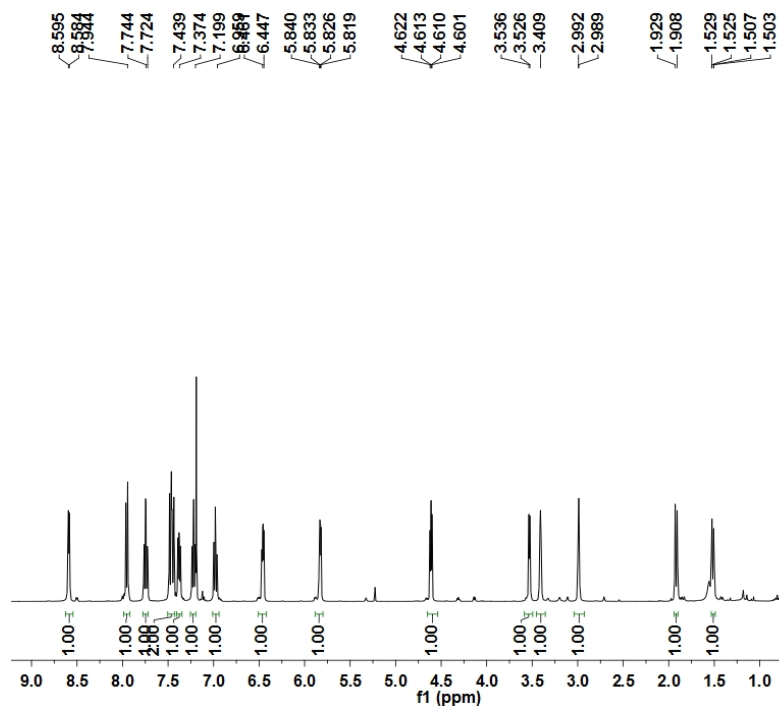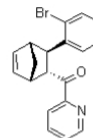

Current Data Parameters

F2 - Acquisition Parameters  
 DATE: 2016-01-18T12:16:20  
 PULPROG: zg30  
 TD: 32768  
 Solvent: CDCl3  
 NS: 64  
 DS: undefined  
 SWH: 8223.7 Hz  
 AQ: undefined  
 TE: 0 C

===== CHANNEL f1 =====  
 NUC1: 1H  
 P1: 9.93 usec  
 SFO1: undefined MHz

F2 - Processing Parameters  
 SI: 65536  
 DC: 0.05  
 LB: 0.30 Hz  
 First Point: 0.50  
 FT: Hyper Quadrature  
 Phase: Manual  
 Ph0: -263.20  
 Ph1: 13.11

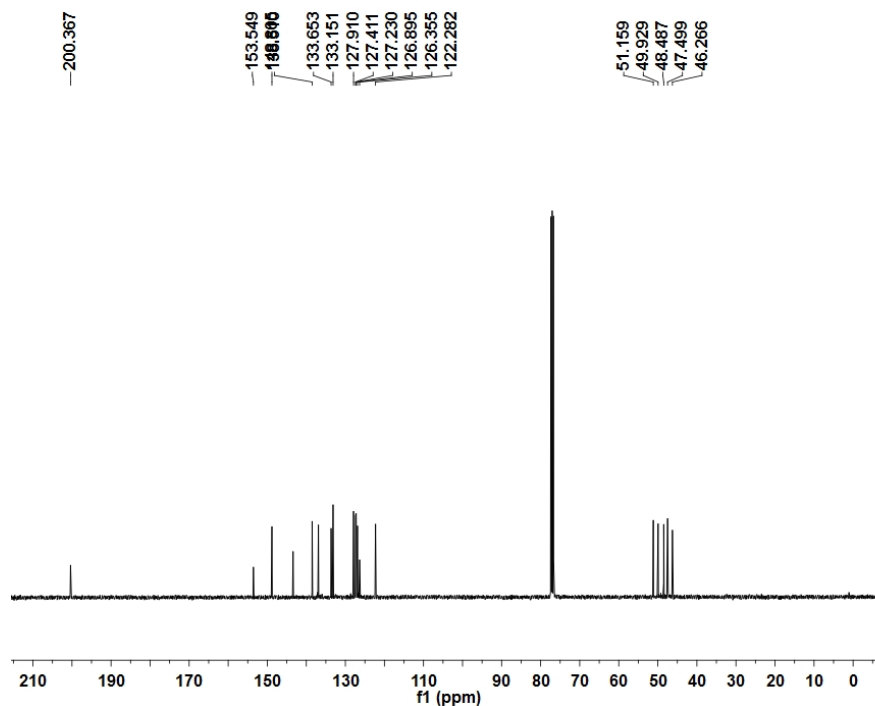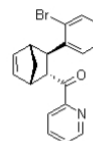

Current Data Parameters

F2 - Acquisition Parameters  
 DATE: 2016-01-18T13:15:46  
 PULPROG: zgpg30  
 TD: 32768  
 Solvent: CDCl3  
 NS: 1024  
 DS: undefined  
 SWH: 24038.5 Hz  
 AQ: undefined  
 TE: 0 C

===== CHANNEL f1 =====  
 NUC1: 13C  
 P1: 9.63 usec  
 SFO1: undefined MHz

F2 - Processing Parameters  
 SI: 65536  
 DC: 0.05  
 LB: 1.00 Hz  
 First Point: 0.50  
 FT: Hyper Quadrature  
 Phase: Manual  
 Ph0: -64.59  
 Ph1: 53.79

5e

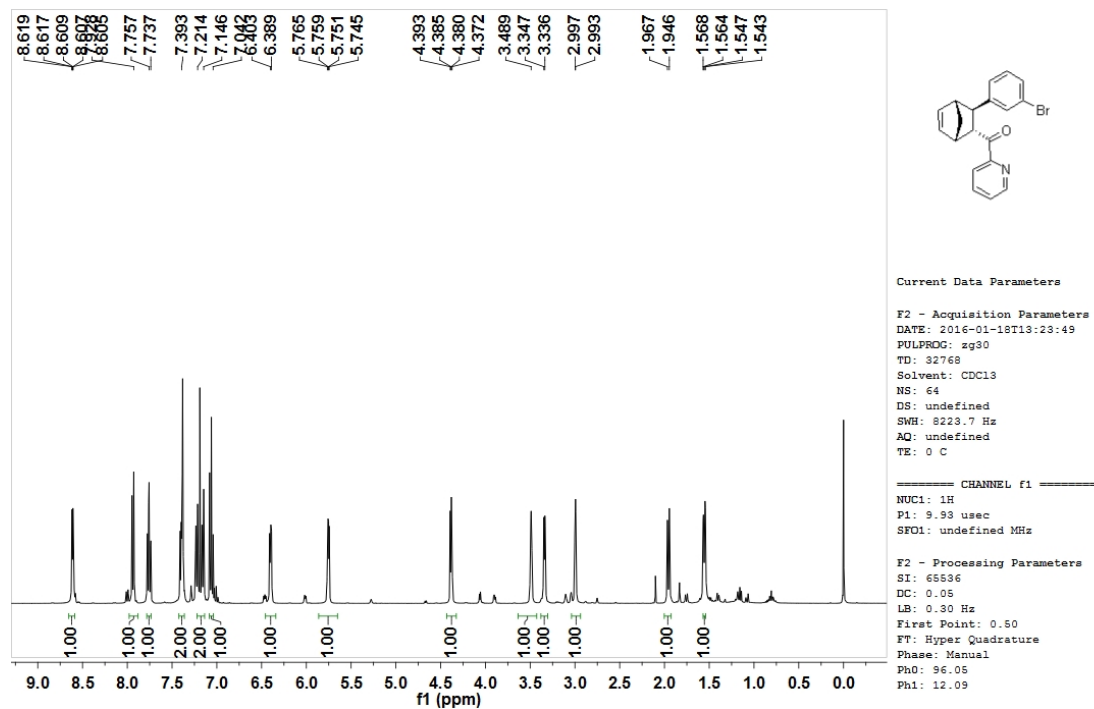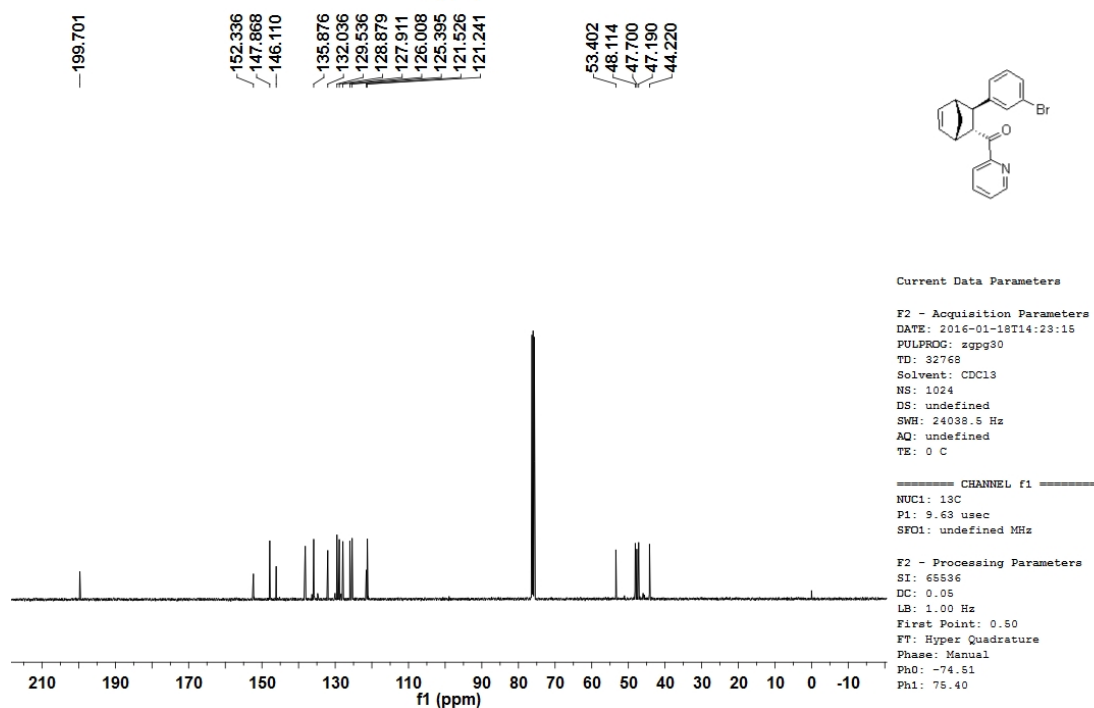

5f

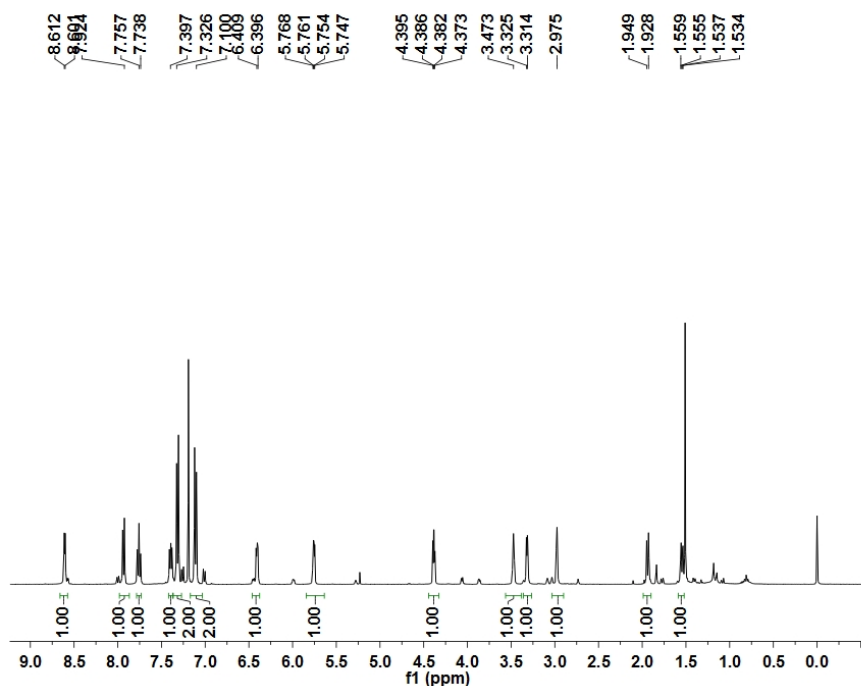

Current Data Parameters

F2 - Acquisition Parameters  
 DATE: 2016-01-14T13:41:08  
 PULPROG: zg30  
 TD: 32768  
 Solvent: CDCl3  
 NS: 64  
 DS: undefined  
 SWH: 8223.7 Hz  
 AQ: undefined  
 TE: 0 C

===== CHANNEL f1 =====  
 NUC1: 1H  
 P1: 9.93 usec  
 SFO1: undefined MHz

F2 - Processing Parameters  
 SI: 65536  
 DC: 0.05  
 LB: 0.30 Hz  
 First Point: 0.50  
 FT: Hyper Quadrature  
 Phase: Manual  
 Ph0: 101.01  
 Ph1: 8.18

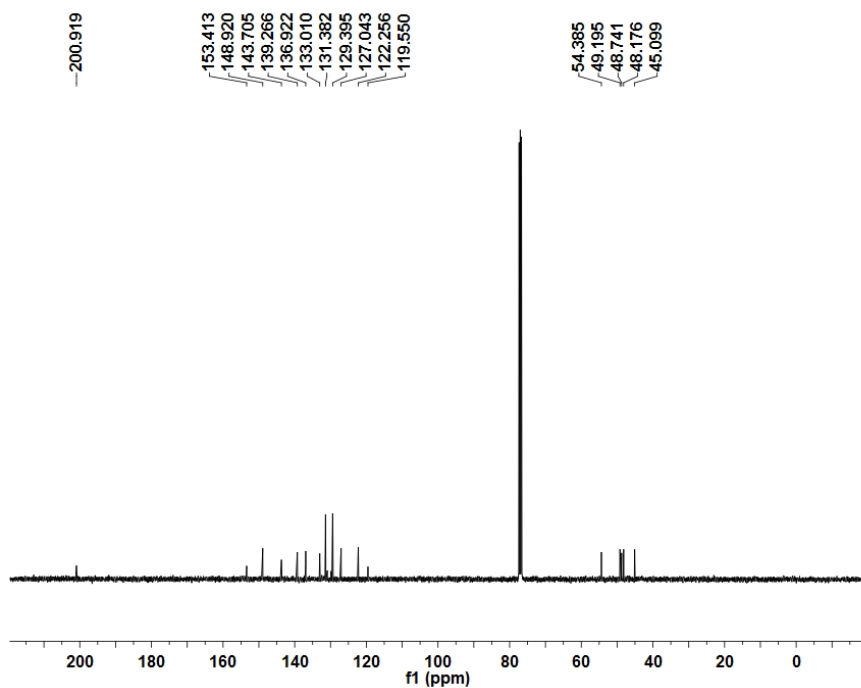

Current Data Parameters

F2 - Acquisition Parameters  
 DATE: 2016-01-14T14:11:19  
 PULPROG: zgpg30  
 TD: 32768  
 Solvent: CDCl3  
 NS: 512  
 DS: undefined  
 SWH: 24038.5 Hz  
 AQ: undefined  
 TE: 0 C

===== CHANNEL f1 =====  
 NUC1: 13C  
 P1: 9.63 usec  
 SFO1: undefined MHz

F2 - Processing Parameters  
 SI: 65536  
 DC: 0.05  
 LB: 1.00 Hz  
 First Point: 0.50  
 FT: Hyper Quadrature  
 Phase: Manual  
 Ph0: -15.18  
 Ph1: -14.30



5g

8.600  
8.598  
8.596  
8.594  
7.736  
7.717  
7.376  
7.366  
7.150  
6.998  
6.404  
5.752  
5.745  
5.738  
5.731  
4.457  
4.448  
4.444  
4.436  
3.457  
3.340  
3.328  
2.975  
2.971  
-2.226  
-1.983  
-1.535  
-1.530  
-1.513  
-1.509

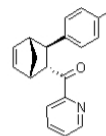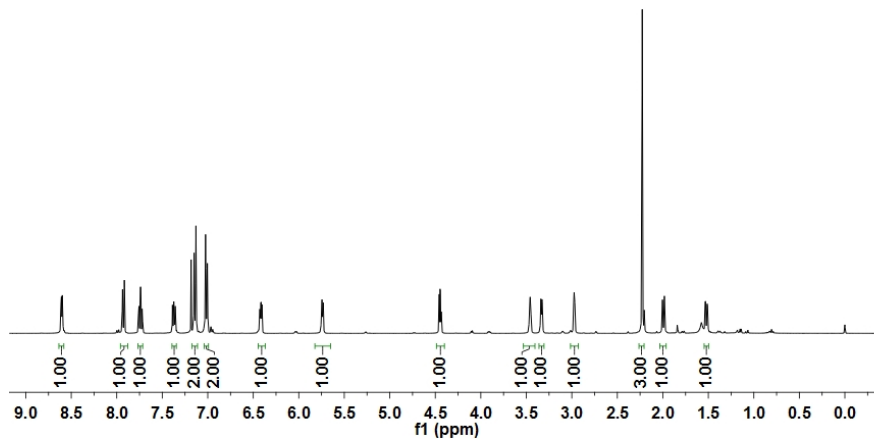

-201.232  
-153.605  
-148.881  
-141.546  
-139.491  
-136.841  
-135.321  
-132.770  
-129.066  
-127.569  
-126.892  
-122.202  
54.150  
49.616  
48.743  
48.224  
45.257  
-20.938

Current Data Parameters

F2 - Acquisition Parameters  
DATE: 2016-01-19T17:21:17  
PULPROG: zg30  
TD: 32768  
Solvent: CDCl3  
NS: 64  
DS: undefined  
SWH: 8223.7 Hz  
AQ: undefined  
TE: 0 C

===== CHANNEL f1 =====  
NUC1: 1H  
P1: 9.93 usec  
SFO1: undefined MHz

F2 - Processing Parameters  
SI: 65536  
DC: 0.05  
LB: 0.30 Hz  
First Point: 0.50  
FT: Hyper Quadrature  
Phase: Manual  
Ph0: 93.53  
Ph1: 14.65

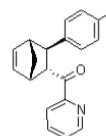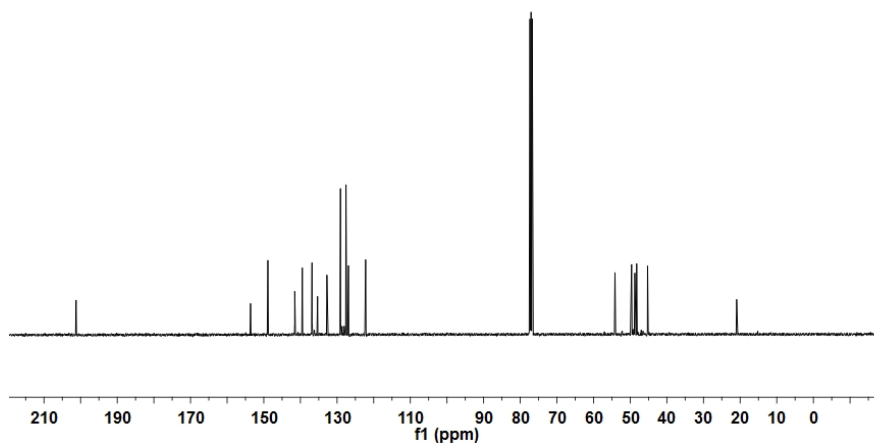

Current Data Parameters

F2 - Acquisition Parameters  
DATE: 2016-01-19T18:20:52  
PULPROG: zgpg30  
TD: 32768  
Solvent: CDCl3  
NS: 1024  
DS: undefined  
SWH: 24038.5 Hz  
AQ: undefined  
TE: 0 C

===== CHANNEL f1 =====  
NUC1: 13C  
P1: 9.63 usec  
SFO1: undefined MHz

F2 - Processing Parameters  
SI: 65536  
DC: 0.05  
LB: 1.00 Hz  
First Point: 0.50  
FT: Hyper Quadrature  
Phase: Manual  
Ph0: -62.41  
Ph1: 56.28

5h

8.607  
8.605  
8.603  
8.600  
7.750  
7.726  
7.376  
7.148  
6.734  
6.403  
5.752  
5.745  
5.738  
5.731  
4.432  
4.423  
4.419  
4.411  
3.702  
3.308  
2.954  
2.951  
1.999  
1.978  
1.540  
1.536  
1.519  
1.515

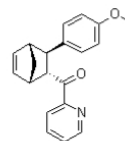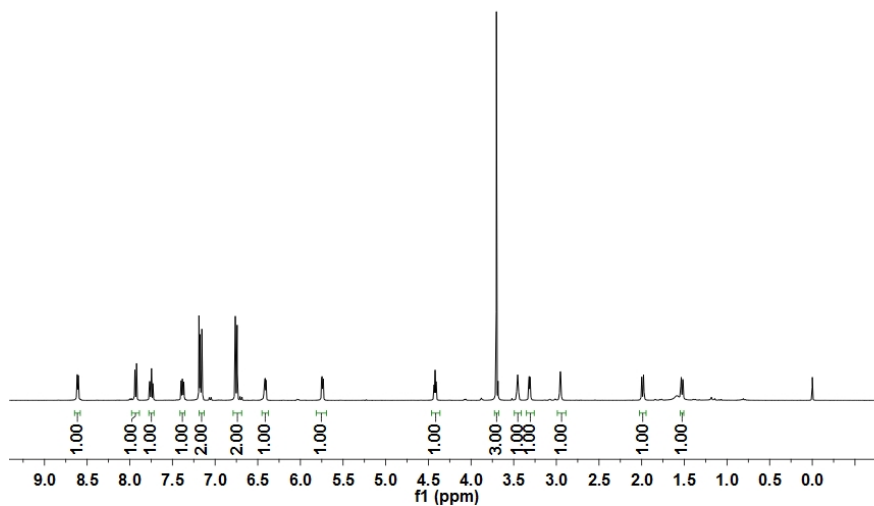

-201.244  
157.733  
153.585  
148.866  
136.873  
128.568  
126.907  
122.213  
113.755  
55.278  
54.272  
49.684  
48.711  
48.184  
44.876

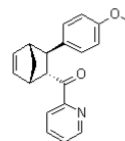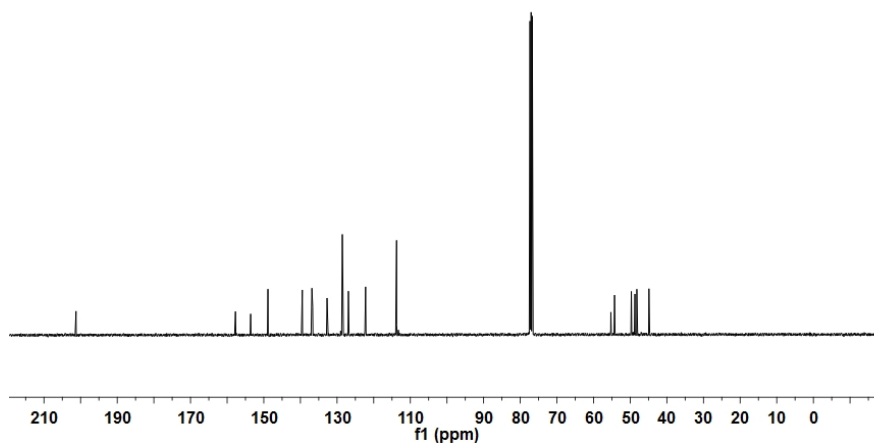

5i

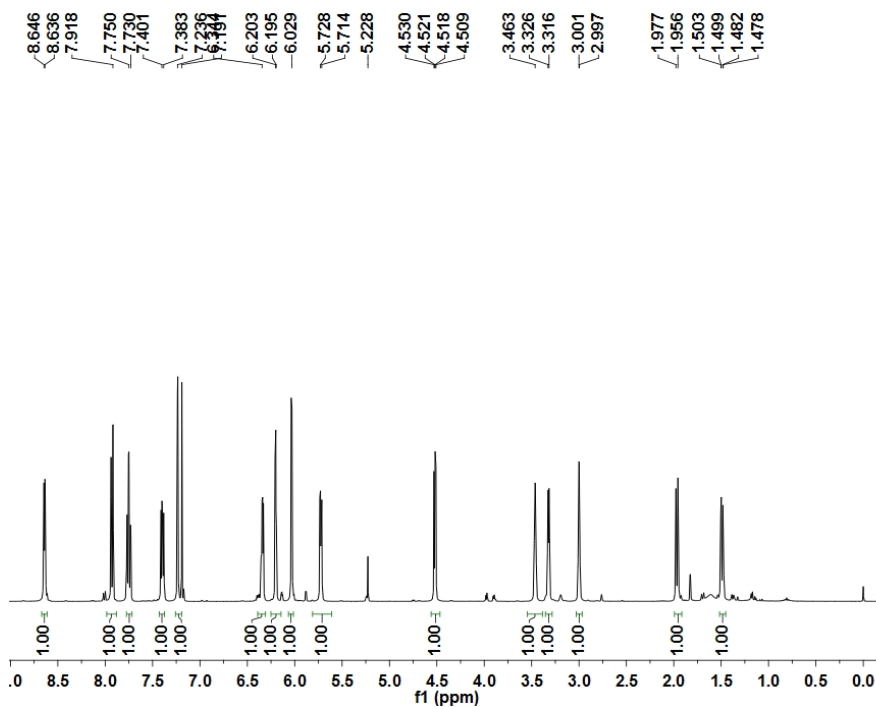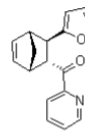

Current Data Parameters

F2 - Acquisition Parameters  
 DATE: 2016-02-16T21:48:32  
 PULPROG: zg30  
 TD: 32768  
 Solvent: CDCl3  
 NS: 64  
 DS: undefined  
 SWH: 8223.7 Hz  
 AQ: undefined  
 TE: 293.5 C

===== CHANNEL f1 =====  
 NUC1: 1H  
 P1: 9.93 usec  
 SFO1: undefined MHz

F2 - Processing Parameters  
 SI: 65536  
 DC: 0.05  
 LB: 0.30 Hz  
 First Point: 0.50  
 FT: Hyper Quadrature  
 Phase: Manual  
 Ph0: 95.05  
 Ph1: 14.98

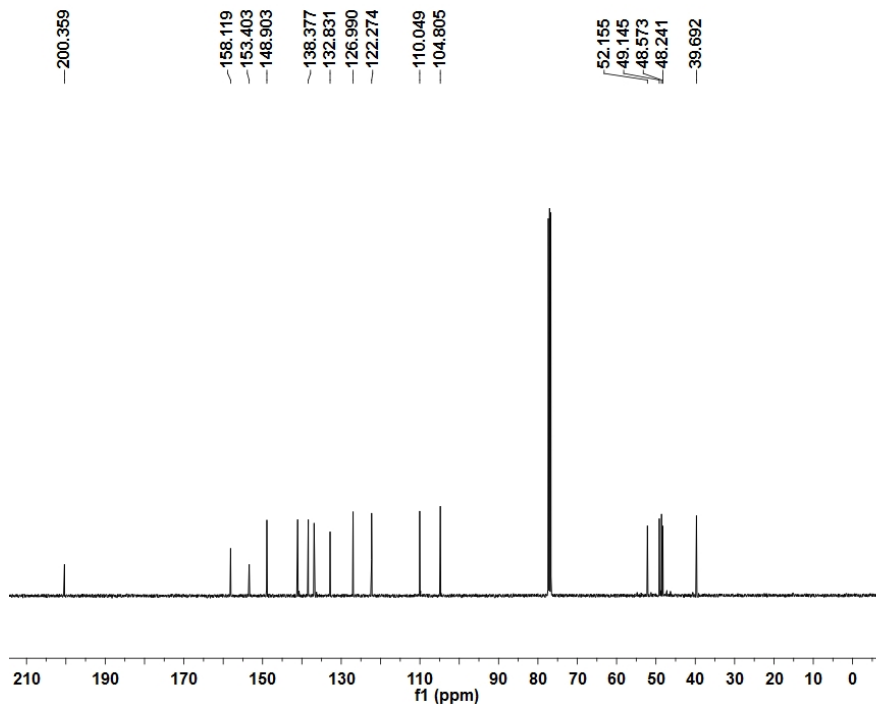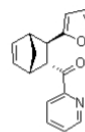

Current Data Parameters

F2 - Acquisition Parameters  
 DATE: 2016-02-16T22:47:58  
 PULPROG: zgpg30  
 TD: 32768  
 Solvent: CDCl3  
 NS: 1024  
 DS: undefined  
 SWH: 24038.5 Hz  
 AQ: undefined  
 TE: 293.9 C

===== CHANNEL f1 =====  
 NUC1: 13C  
 P1: 9.63 usec  
 SFO1: undefined MHz

F2 - Processing Parameters  
 SI: 65536  
 DC: 0.05  
 LB: 1.00 Hz  
 First Point: 0.50  
 FT: Hyper Quadrature  
 Phase: Manual  
 Ph0: -51.61  
 Ph1: 49.54

5j

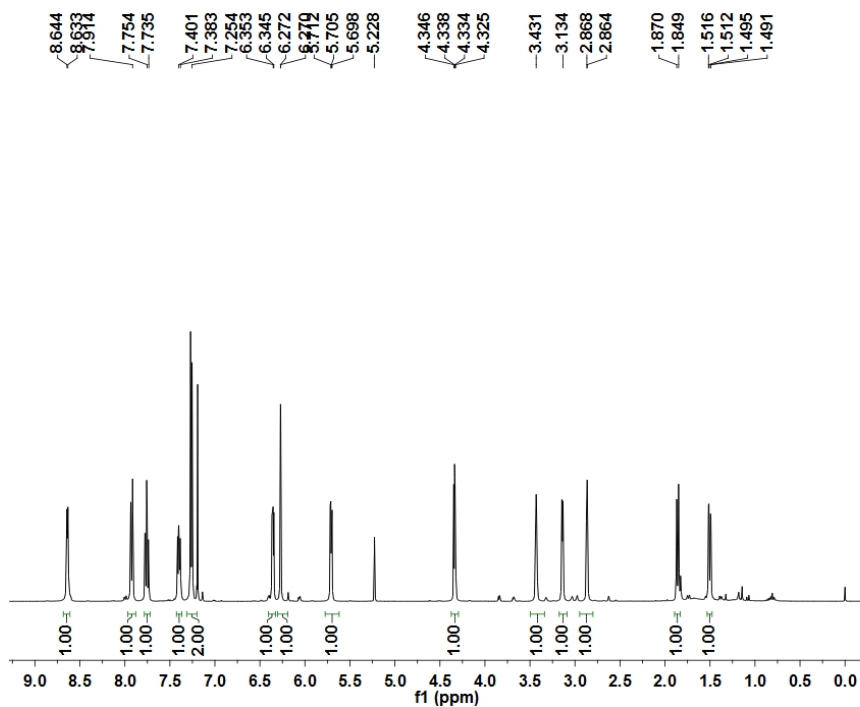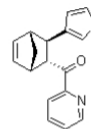

Current Data Parameters

F2 - Acquisition Parameters  
 DATE: 2016-02-16T22:55:58  
 PULPROG: zg30  
 TD: 32768  
 Solvent: CDCl3  
 NS: 64  
 DS: undefined  
 SWH: 8223.7 Hz  
 AQ: undefined  
 TE: 293.5 C

===== CHANNEL f1 =====  
 NUC1: 1H  
 P1: 9.93 usec  
 SFO1: undefined MHz

F2 - Processing Parameters  
 SI: 65536  
 DC: 0.05  
 LB: 0.30 Hz  
 First Point: 0.50  
 FT: Hyper Quadrature  
 Phase: Manual  
 Ph0: 94.39  
 Ph1: 14.00

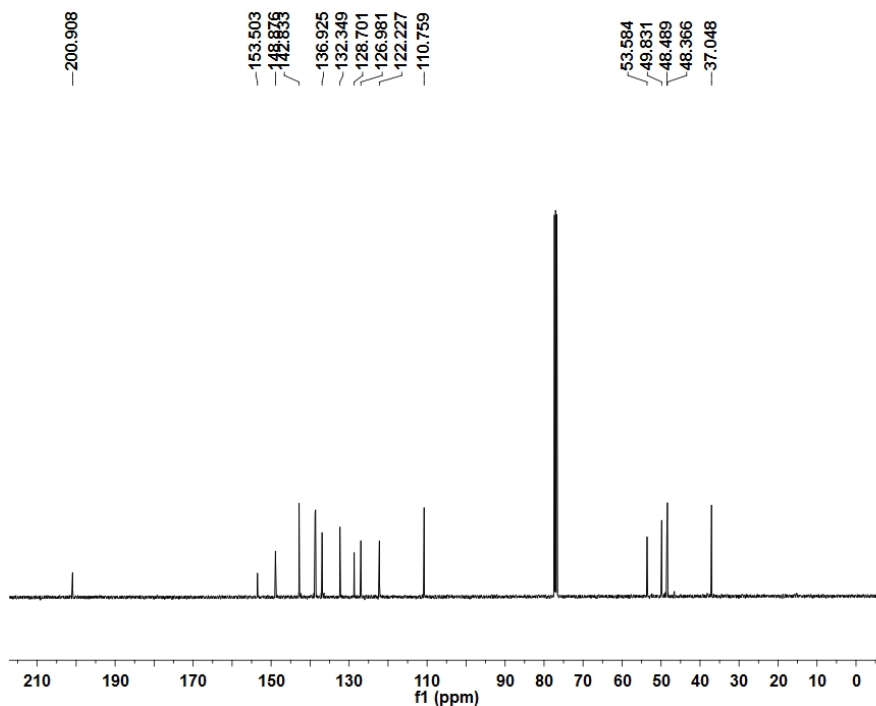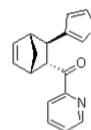

Current Data Parameters

F2 - Acquisition Parameters  
 DATE: 2016-02-16T23:55:25  
 PULPROG: zgpg30  
 TD: 32768  
 Solvent: CDCl3  
 NS: 1024  
 DS: undefined  
 SWH: 24038.5 Hz  
 AQ: undefined  
 TE: 293.9 C

===== CHANNEL f1 =====  
 NUC1: 13C  
 P1: 9.63 usec  
 SFO1: undefined MHz

F2 - Processing Parameters  
 SI: 65536  
 DC: 0.05  
 LB: 1.00 Hz  
 First Point: 0.50  
 FT: Hyper Quadrature  
 Phase: Manual  
 Ph0: -71.52  
 Ph1: 74.19

5k

8.640  
8.636  
8.629  
8.625  
7.721  
7.766  
7.727  
7.393  
7.374  
7.036  
6.884  
6.368  
5.740  
5.733  
5.726  
5.719  
4.512  
4.503  
4.500  
4.491  
3.558  
3.554  
3.483  
2.990  
2.988  
2.987  
2.055  
2.034  
1.581  
1.577  
1.560  
1.555

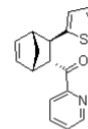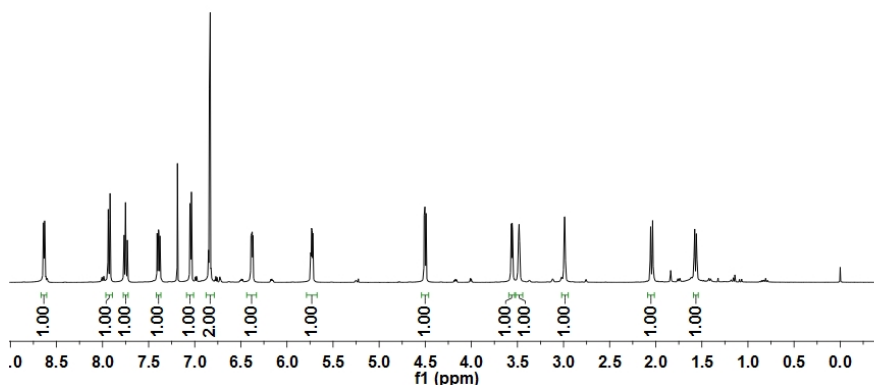

-200.416  
153.369  
149.035  
148.932  
136.885  
132.691  
127.010  
126.673  
123.713  
122.989  
122.251  
55.687  
51.523  
48.604  
48.565  
41.583

Current Data Parameters

F2 - Acquisition Parameters  
DATE: 2016-01-26T17:47:52  
PULPROG: zg30  
TD: 32768  
Solvent: CDCl3  
NS: 64  
DS: undefined  
SWH: 8223.7 Hz  
AQ: undefined  
TE: 0 C

===== CHANNEL f1 =====  
NUC1: 1H  
P1: 9.93 usec  
SFO1: undefined MHz

F2 - Processing Parameters  
SI: 65536  
DC: 0.05  
LB: 0.30 Hz  
First Point: 0.50  
FT: Hyper Quadrature  
Phase: Manual  
Ph0: 96.23  
Ph1: 8.33

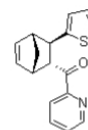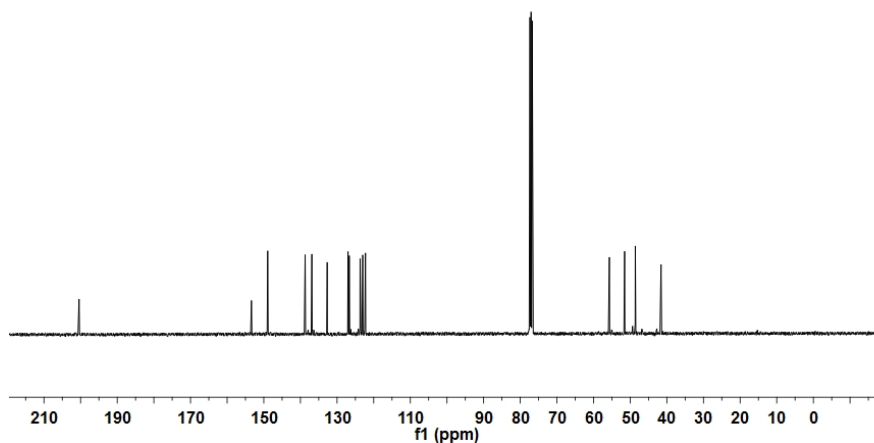

Current Data Parameters

F2 - Acquisition Parameters  
DATE: 2016-01-26T18:47:18  
PULPROG: zgpg30  
TD: 32768  
Solvent: CDCl3  
NS: 1024  
DS: undefined  
SWH: 24038.5 Hz  
AQ: undefined  
TE: 0 C

===== CHANNEL f1 =====  
NUC1: 13C  
P1: 9.63 usec  
SFO1: undefined MHz

F2 - Processing Parameters  
SI: 65536  
DC: 0.05  
LB: 1.00 Hz  
First Point: 0.50  
FT: Hyper Quadrature  
Phase: Manual  
Ph0: -74.45  
Ph1: 73.91

51

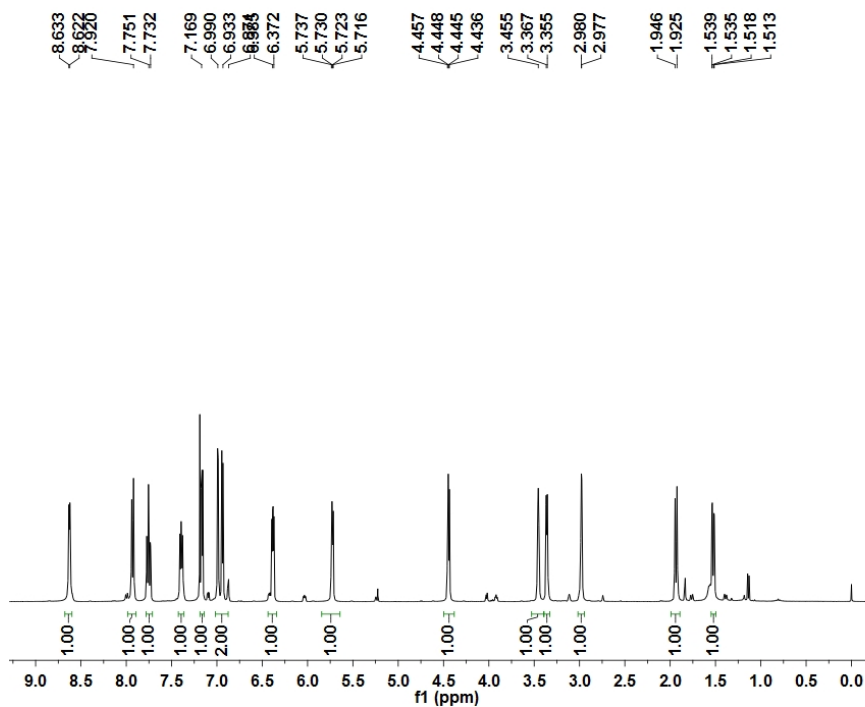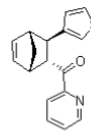

Current Data Parameters

F2 - Acquisition Parameters  
 DATE: 2016-01-26T16:40:23  
 PULPROG: zg30  
 TD: 32768  
 Solvent: CDCl3  
 NS: 64  
 DS: undefined  
 SWH: 8223.7 Hz  
 AQ: undefined  
 TE: 0 C

===== CHANNEL f1 =====  
 NUC1: 1H  
 P1: 9.93 usec  
 SFO1: undefined MHz

F2 - Processing Parameters  
 SI: 65536  
 DC: 0.05  
 LB: 0.30 Hz  
 First Point: 0.50  
 FT: Hyper Quadrature  
 Phase: Manual  
 Ph0: -262.89  
 Ph1: 9.93

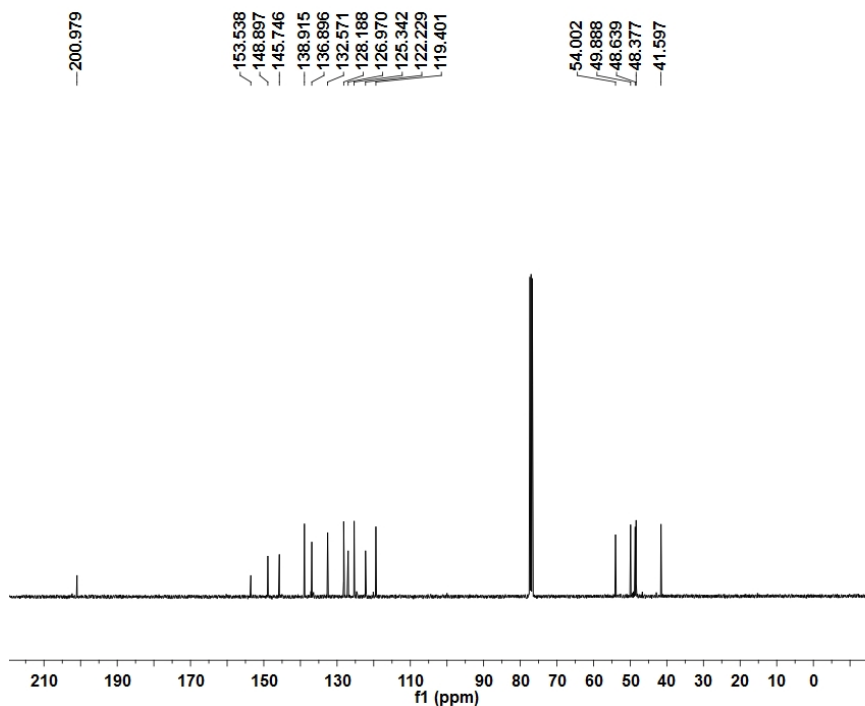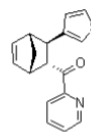

Current Data Parameters

F2 - Acquisition Parameters  
 DATE: 2016-01-26T17:39:49  
 PULPROG: zgpg30  
 TD: 32768  
 Solvent: CDCl3  
 NS: 1024  
 DS: undefined  
 SWH: 24038.5 Hz  
 AQ: undefined  
 TE: 0 C

===== CHANNEL f1 =====  
 NUC1: 13C  
 P1: 9.63 usec  
 SFO1: undefined MHz

F2 - Processing Parameters  
 SI: 65536  
 DC: 0.05  
 LB: 1.00 Hz  
 First Point: 0.50  
 FT: Hyper Quadrature  
 Phase: Manual  
 Ph0: -59.29  
 Ph1: 60.42

5m

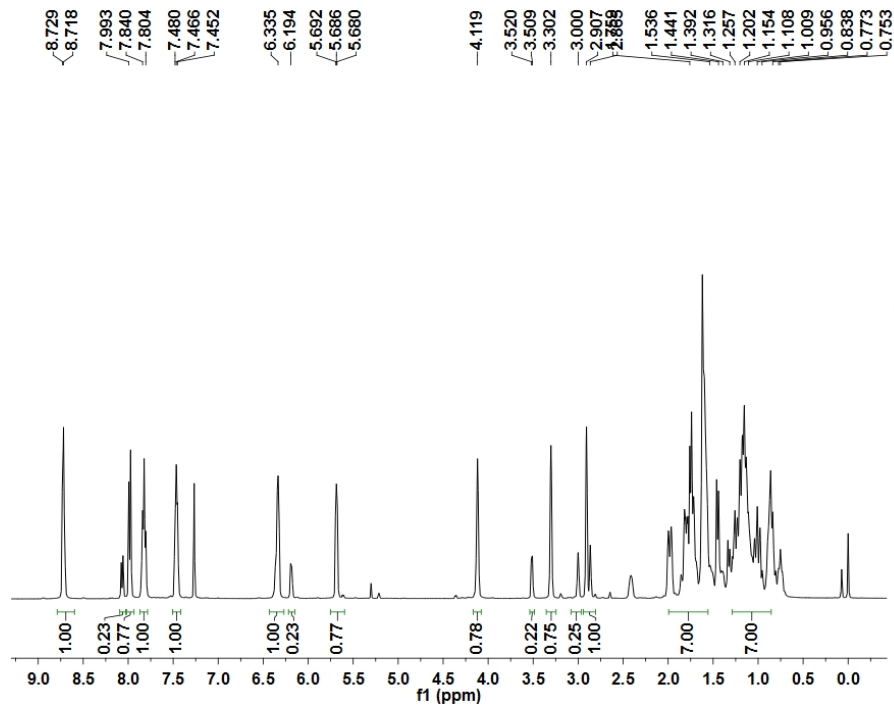

Current Data Parameters

F2 - Acquisition Parameters  
 DATE: 2016-05-17T04:06:16  
 PULPROG: zg30  
 TD: 32768  
 Solvent: CDCl3  
 NS: 64  
 DS: undefined  
 SWH: 8223.7 Hz  
 AQ: undefined  
 TE: 295.5 C

CHANNEL f1  
 NUC1: 1H  
 P1: 9.93 usec  
 SFO1: undefined MHz

F2 - Processing Parameters  
 SI: 65536  
 DC: 0.05  
 LB: 0.30 Hz  
 First Point: 0.50  
 FT: Hyper Quadrature  
 Phase: Manual  
 Ph0: 93.75  
 Ph1: 22.48

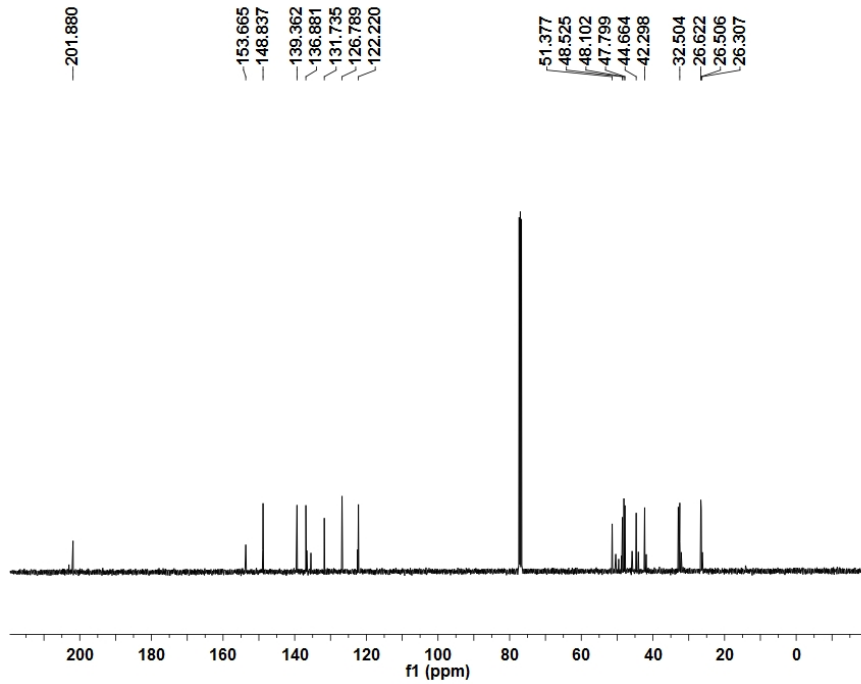

Current Data Parameters

F2 - Acquisition Parameters  
 DATE: 2016-05-17T04:36:33  
 PULPROG: zgpg30  
 TD: 32768  
 Solvent: CDCl3  
 NS: 512  
 DS: undefined  
 SWH: 24038.5 Hz  
 AQ: undefined  
 TE: 296 C

CHANNEL f1  
 NUC1: 13C  
 P1: 9.63 usec  
 SFO1: undefined MHz

F2 - Processing Parameters  
 SI: 65536  
 DC: 0.05  
 LB: 1.00 Hz  
 First Point: 0.50  
 FT: Hyper Quadrature  
 Phase: Manual  
 Ph0: -67.71  
 Ph1: 57.26

5p

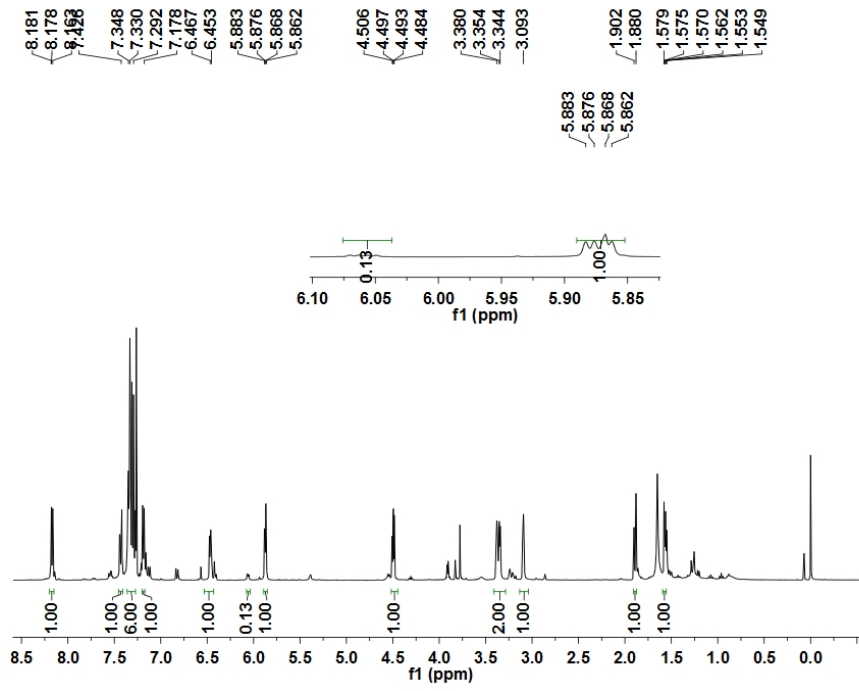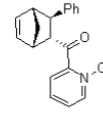

Current Data Parameters

F2 - Acquisition Parameters  
 DATE: 2016-04-05T01:35:49  
 PULPROG: zg30  
 TD: 32768  
 Solvent: CDCl3  
 NS: 32  
 DS: undefined  
 SWH: 8223.7 Hz  
 AQ: undefined  
 TE: 0 C

===== CHANNEL f1 =====  
 NUC1: 1H  
 P1: 9.93 usec  
 SFO1: undefined MHz

F2 - Processing Parameters  
 SI: 65536  
 DC: 0.05  
 LB: 0.30 Hz  
 First Point: 0.50  
 FT: Hyper Quadrature  
 Phase: Manual  
 Ph0: 102.48  
 Ph1: -0.69

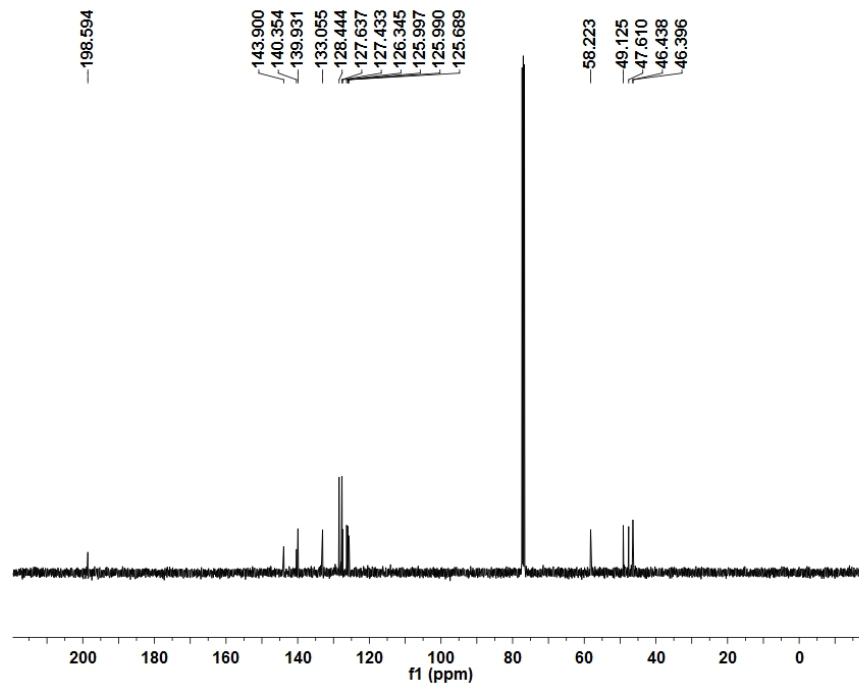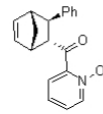

Current Data Parameters

F2 - Acquisition Parameters  
 DATE: 2016-04-05T01:51:24  
 PULPROG: zgpg30  
 TD: 32768  
 Solvent: CDCl3  
 NS: 256  
 DS: undefined  
 SWH: 24038.5 Hz  
 AQ: undefined  
 TE: 0 C

===== CHANNEL f1 =====  
 NUC1: 13C  
 P1: 9.63 usec  
 SFO1: undefined MHz

F2 - Processing Parameters  
 SI: 65536  
 DC: 0.05  
 LB: 1.00 Hz  
 First Point: 0.50  
 FT: Hyper Quadrature  
 Phase: Manual  
 Ph0: -26.17  
 Ph1: -1.84



## 11. References

1. (a) Y. H. Wen, X. Huang, J. L. Huang, Y. Xiong, B. Qin and X. M. Feng, *Synlett*, 2005, 2445; (b) Z. P. Yu, X. H. Liu, Z. H. Dong, M. S. Xie and X. M. Feng, *Angew. Chem., Int. Ed.*, 2008, **47**, 1308; (c) K. Zheng, B. Qin, X. H. Liu and X. M. Feng, *J. Org. Chem.*, 2007, **72**, 8478; (d) X. Zhang, D. H. Chen, X. H. Liu and X. M. Feng, *J. Org. Chem.*, 2007, **72**, 5227; (e) X. Zhou, D. J. Shang, Q. Zhang, L. L. Lin, X. H. Liu and X. M. Feng, *Org. Lett.*, 2009, **11**, 1401.
2. (a) X. Chen, L. Zhu, L. Fang, S. Yan and J. Lin, *RSC Adv.*, 2014, **4**, 9926; (b) S. Zhang, Y.-C. Luo, X.-Q. Hu, Z.-Y. Wang, Y.-M. Liang and P.-F. Xu, *J. Org. Chem.* 2015, **80**, 7288.
3. (a) S. Barroso, G. Blay, and J. R. Pedro, *Org. Lett.*, 2007, **9**, 1983; N. Molleti, N. K. Rana and V. K. Singh, *Org. Lett.*, 2012, **14**, 4322.
